# Supplementary material for: Synthesis and characterization of new ruthenium N-heterocyclic carbene Hoveyda II-type complexes. Study of reactivity in ring closing metathesis reactions
Source: Royal Society of Chemistry journal article supplement (doi:10.1039/c2dt31540h), 2012-01-01
Supplement: c2dt31540h.pdf [file c2dt31540h.pdf]

## Supporting Information Part 1

### Synthesis and characterization of new ruthenium *N*-heterocyclic carbene Hoveyda II-type complexes. Study of reactivity in ring closing metathesis reaction

Estíbaliz Merino,\* Evelyne Poli, Urbano Díaz\* and Daniel Brunel

General procedures

<sup>1</sup>H-NMR spectra of the reaction mixtures in the kinetics

**Scheme 1.** Synthesis of complex **2**.

**Scheme 2.** Synthetic route of the complex **3**.

**Scheme 3.** Synthetic route of the complex **4**.

Physical data.

<sup>1</sup>H and <sup>13</sup>C-NMR spectra of the intermediates and ruthenium complexes **2**, **3** and **4**.

CVs of cycles of ruthenium complexes **1**, **2**, **3** and **4**.

#### General procedures

All the reactions were carried out under nitrogen atmosphere. Glassware was dried in an oven at 110 °C before use. 1,3-Bis(2,4,6-trimethylphenyl)imidazolium chloride was purchased from Strem. The Hoveyda-Grubbs first- and second- generation catalysts were purchased from Aldrich. The solvents were purified by passage through a neutral alumina column under nitrogen. CD<sub>2</sub>Cl<sub>2</sub> was distilled from CaH<sub>2</sub> into a Schlenk tube and freeze/pump/thawed 3 times. Analytical thin-layer chromatography (TLC) was performed on Merck silica gel aluminium plates with F-254 indicator, visualised by irradiation with UV light. Column chromatography was performed using silica gel Merck 60 (particle size 0.040-0.063 mm). <sup>1</sup>H-NMR and <sup>13</sup>C-NMR were recorded on a Bruker AV 300 spectrometer in CDCl<sub>3</sub>. Data are reported in the following order: chemical shift (δ) in ppm; multiplicities are indicated s

(singlet), bs (broad singlet), d (doublet), t (triplet), sept (septuplet), m (multiplet); coupling constants ( $J$ ) are in Hertz (Hz).

### **Stock Solution Preparation**

Inside a glovebox, a flask is charged with catalyst (0.016 mmol) and  $\text{CD}_2\text{Cl}_2$  added to prepare 1.0 mL of stock solution (0.016 M).

### **RCM of Diethyldiallyl malonate**

An NMR tube with a screw-cap septum top was charged inside a glovebox with catalyst stock solution (0.016 M, 50  $\mu\text{L}$ , 0.80  $\mu\text{mol}$ , 1.0 mol%) and  $\text{CD}_2\text{Cl}_2$  (0.75 mL). The sample was equilibrated at 30°C in the NMR probe before diethyldiallyl malonate (19.3  $\mu\text{L}$ , 19.2 mg, 0.080 mmol, 0.1 M) was added via syringe. The conversion to dimethyl 3-cyclopentene-1,1-dicarboxylate was determined by comparing the ratio of the integrals of the methylene protons in the starting material,  $\delta$  2.64 (dt), with those in the product,  $\delta$  3.02 (s).

### **RCM of *N,N'*-diallyl-4-methylbenzenesulfonamide**

An NMR tube with a screw-cap septum top was charged inside a glovebox with catalyst stock solution (0.016 M, 50  $\mu\text{L}$ , 0.80  $\mu\text{mol}$ , 1.0 mol%) and  $\text{CD}_2\text{Cl}_2$  (0.75 mL). The sample was equilibrated at 30°C in the NMR probe before *N,N'*-diallyl-4-methylbenzenesulfonamide (20.1 mg, 0.080 mmol, 0.1 M) was added via syringe. The conversion to 1-tosyl-2,5-dihydro-1H-pyrrole was determined by comparing the ratio of the integrals of the methylene protons in the starting material,  $\delta$  3.82 (dt), with those in the product,  $\delta$  4.12 (s).

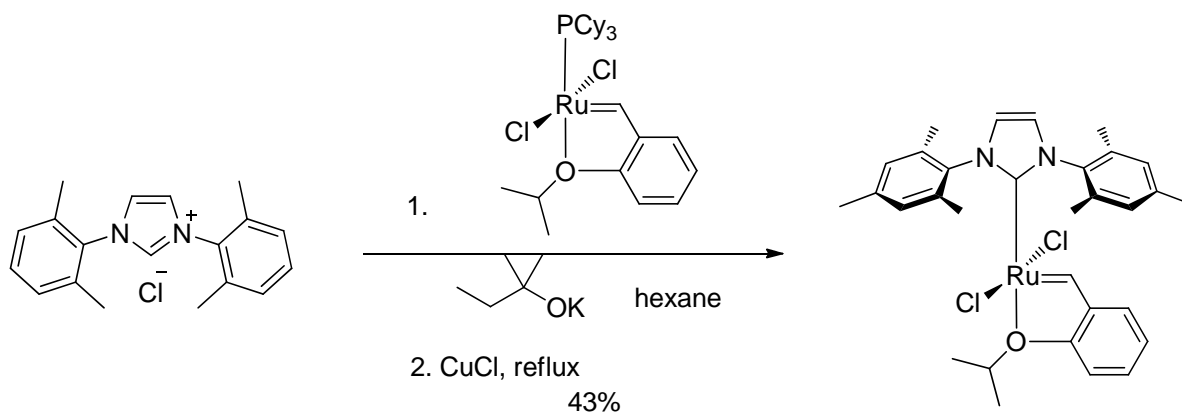

**Scheme 1.** Synthesis of complex **2**.

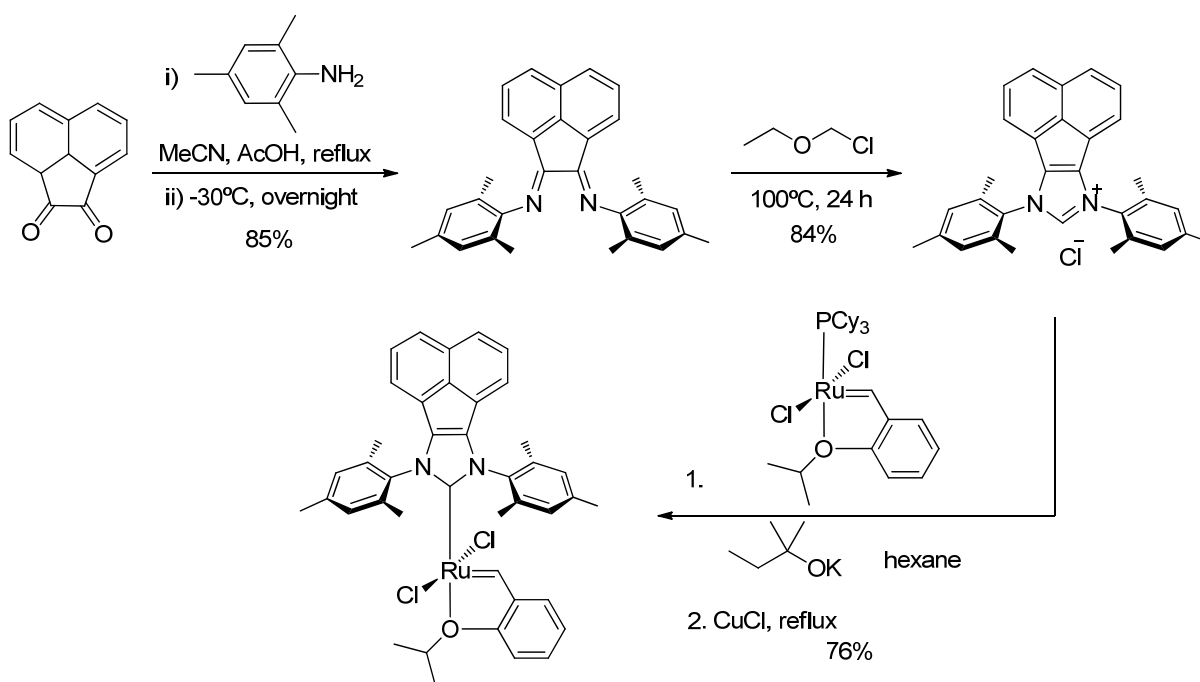

**Scheme 2.** Synthetic route of the complex **3**.

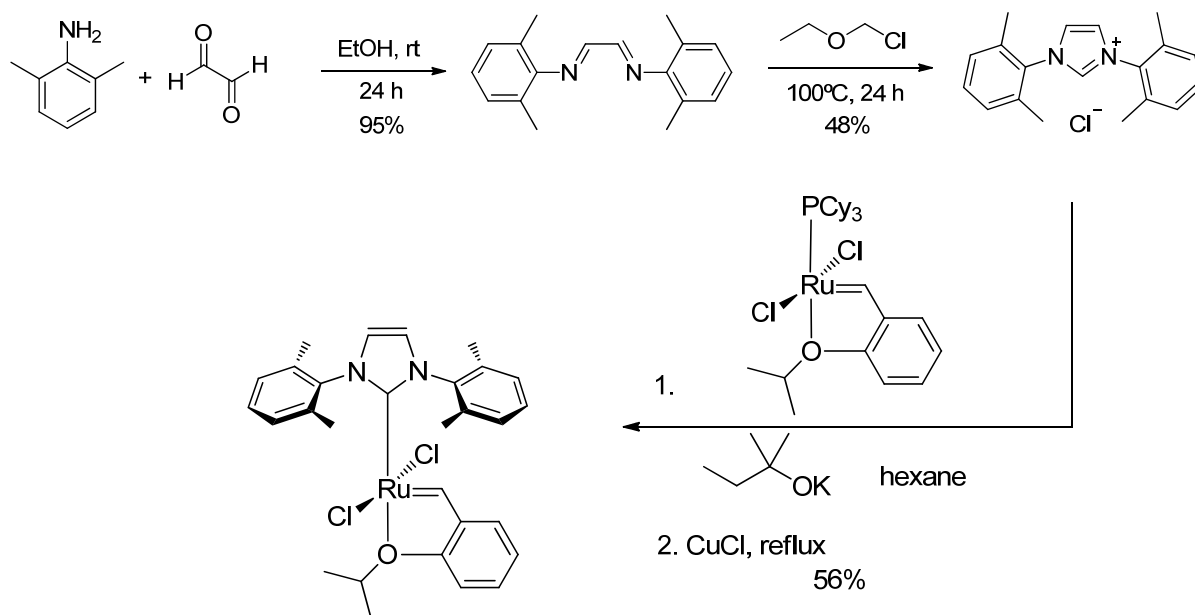

**Scheme 3.** Synthetic route of the complex 4.

### Electrochemical Experiments.

Cyclic voltammetric experiments were performed on an Epsilon Electrochemical Analyzer. A three-electrode cell was used which was equipped with platinum as working electrode, a platinum wire as a counter electrode, and an Ag/AgCl electrode as reference.

Electrochemical measurements were performed at room temperature, under nitrogen atmosphere at  $100 \text{ mV} \cdot \text{s}^{-1}$  in a solution of ruthenium complex in dry dichloromethane ( $10^{-3}$  M) containing tetra *n*-butylammonium hexafluorophosphate as the supporting electrolyte.

### <sup>1</sup>H NMR Spectra of the reaction mixtures

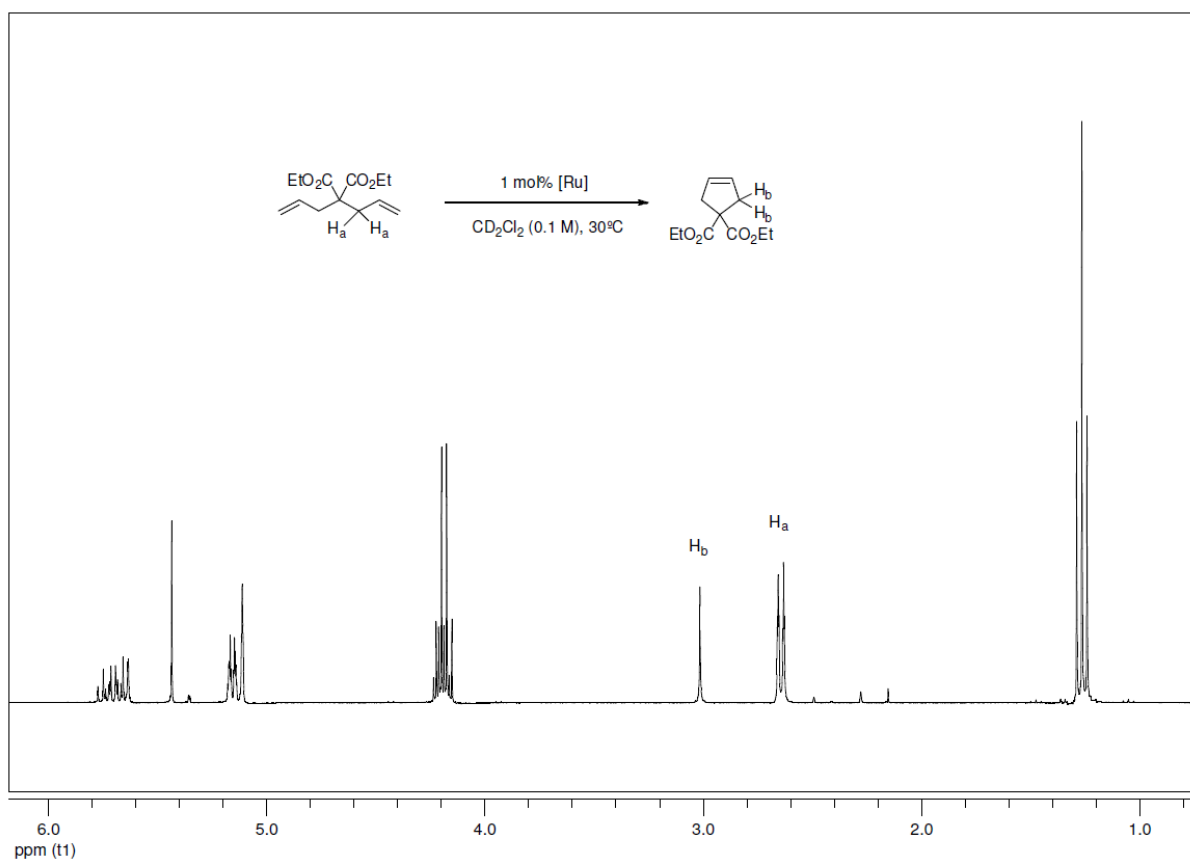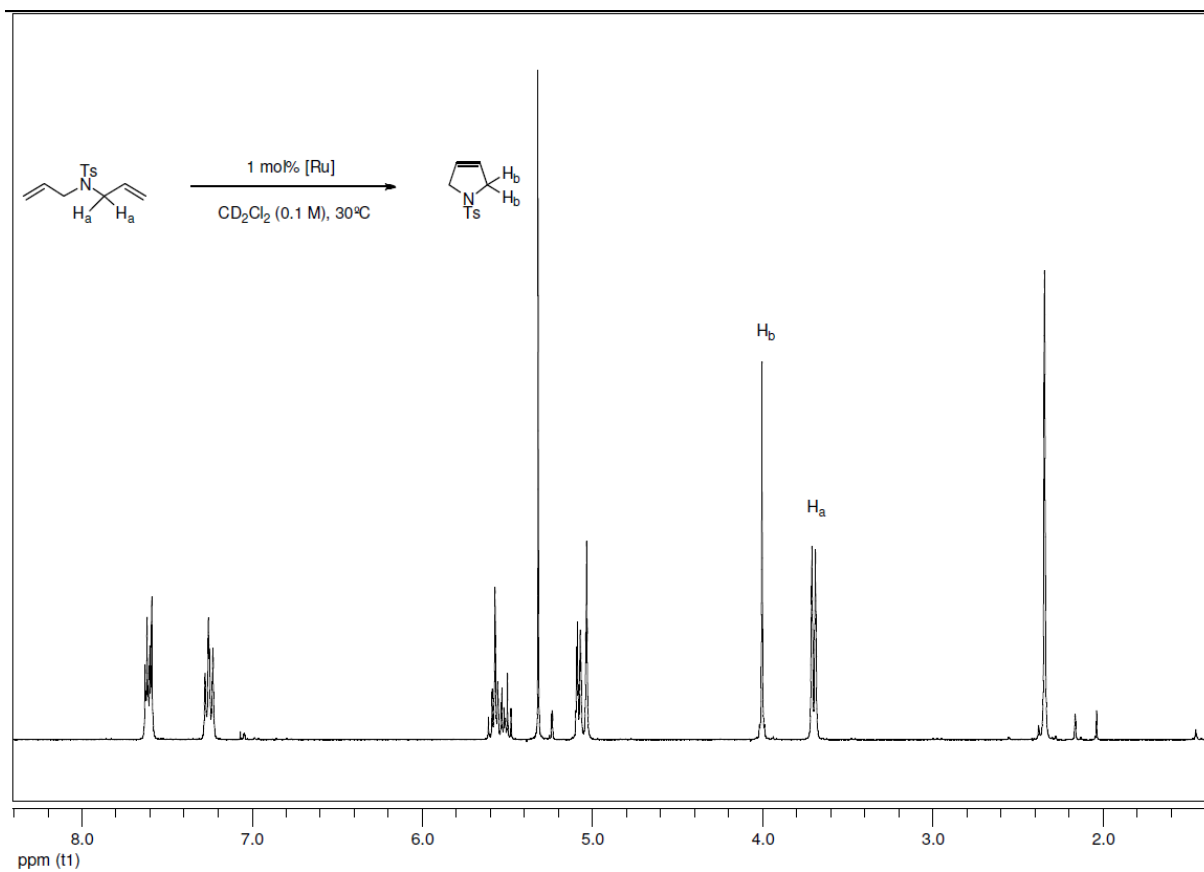

## Physical data

### Bis-[*N,N'*-(2,4,6-trimethylphenyl)imino]-acenaphthene<sup>1,2</sup>

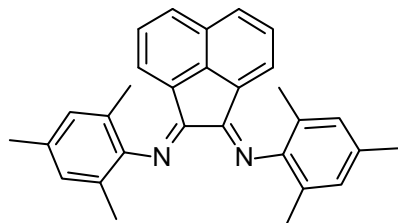

Acenaphthenequinone (15.0 g, 82 mmol) was suspended in acetonitrile (500 mL) and heated to 80°C for 1 hour. Acetic acid (156 mL) was added, and heating was continued until the acenaphthenequinone had completely dissolved. To this hot solution was added 2,4,6-trimethylaniline (25 g, 181 mmol) slowly with a dropping funnel over 20 min. The resulting solution was heated under reflux for another 3 h and cooled to room temperature. After one night at -30°C, the precipitated orange solid was filtered, washed with pentane and dried in air (28.6 g, 85% yield).

<sup>1</sup>H NMR (300 MHz, CDCl<sub>3</sub>): δ = 7.89 (d, *J* = 8.3 Hz, 2H), 7.40 (t, *J* = 7.4 Hz, 2H), 6.98 (s, 4H), 6.77 (d, *J* = 7.2 Hz, 2H), 2.38 (s, 6H), 2.10 (s, 12H); <sup>13</sup>C NMR (75 MHz, CDCl<sub>3</sub>): δ = 161.03, 146.74, 140.50, 132.76, 130.96, 129.67, 128.89, 128.73, 128.18, 124.55, 122.44, 20.90, 17.68.

### Mes(BIAN) imidazolium chloride<sup>3</sup>

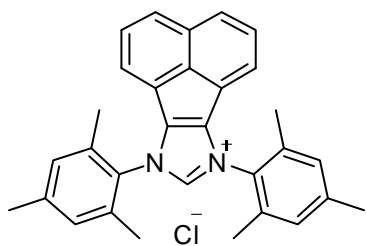

The compound Mes(BIAN) imidazolium chloride was prepared using the method published by Vasudevan *et al.*<sup>4</sup> Mes(BIAN) (1.00 g, 2.4 mmol) and ethoxy(methyl)chloride (4.5 mL, 48 mmol) were added to a Schlenk under nitrogen atmosphere. The reaction mixture was stirred at 100°C for 24 h. The reaction mixture is cooled at room temperature. Addition of 10 mL of diethyl ether, the resulting yellow solid was filtered, washed with diethyl ether and dried *in vacuo* to afford the product (935 mg, 84% yield).

$^1\text{H}$  NMR (300 MHz,  $\text{CDCl}_3$ ):  $\delta$  = 10.73 (bs, 1H), 7.99 (d,  $J$  = 8.3 Hz, 2H), 7.57 (dd,  $J$  = 8.2 and 7.1 Hz, 2H), 7.29 (d,  $J$  = 7.0 Hz, 2H), 7.14 (s, 4H), 2.41 (s, 6H), 2.29 (s, 12H);  $^{13}\text{C}$  NMR (75 MHz,  $\text{CDCl}_3$ ):  $\delta$  = 141.39, 136.59, 134.02, 130.43, 130.23, 130.17, 129.77, 129.56, 128.14, 123.21, 122.85, 21.22, 17.79; HRMS (ESI):  $m/z$ : calcd for  $\text{C}_{31}\text{H}_{29}\text{N}_2^+$   $m/z$  429.2325; found: 429.2337.

### **General procedure to synthesize the ruthenium complexes**

The complexes of ruthenium were prepared using the method published by Bieniek et al.<sup>5</sup> A dry Schlenk with a magnetic stirring bar was charged under a nitrogen atmosphere with the corresponding imidazolium salt (0.2 mmol) and dry *n*-hexane (2.4 mL). A solution of potassium *tert*-amylate in toluene (1.7 M solution in toluene, 122  $\mu\text{L}$ , 0.21 mmol) was added to a well-stirred suspension, and the resulting mixture was stirred under nitrogen at room temperature for 1 h. To the resulting solution was added the solid Hoveyda-Grubbs first-generation catalyst (100 mg, 0.17 mmol) in one portion. The Schlenk was equipped with a reflux condenser and the reaction mixture was refluxed for 2 h. After this time, the Schlenk is cooled at room temperature, and  $\text{CuCl}$  (0.29 mmol) was added in one portion. The resulting mixture was refluxed for 2 h. From this point, all manipulations were carried out in air. The reaction mixture was evaporated to dryness, and the resulting solid was redissolved in ethyl acetate. The solution was filtrated through a Büchner funnel with a glass frit filled with Celite and then concentrated in vacuo. The ruthenium complex was purified by precipitation or column chromatography.

**1,3-bis(2,4,6-trimethylphenyl)-2,3-dihydro-1H-imidazole  $\text{Cl}_2\text{Ru}(=\text{CH}-o\text{-O}-i\text{-PrC}_6\text{H}_4)$**

(2)

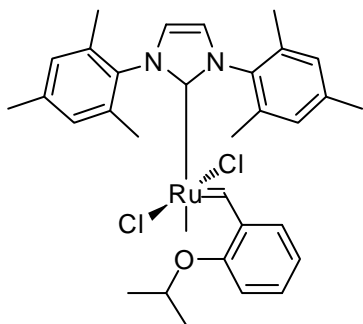

This ruthenium complex was prepared using the general method described previously. The pure product (45.3 mg, 43% yield) was obtained by purification by column chromatography (hexane/ethyl acetate).

$^1\text{H}$  NMR (300 MHz,  $\text{CDCl}_3$ ):  $\delta$  = 16.71 (s, 1H), 7.49 (ddd,  $J$  = 8.4, 7.4 and 1.7 Hz, 1H), 7.29-7.26 (m, 1H), 7.12 (m, 5H), 7.01 (dd,  $J$  = 7.5 and 1.6 Hz, 1H), 6.88 (td,  $J$  = 7.5 and 0.6 Hz, 1H), 6.83-6.77 (m, 1H), 4.93 (sept,  $J$  = 6.1 Hz, 1H), 2.45 (s, 6H), 2.27 (s, 12H), 1.36 (d,  $J$  = 6.1 Hz, 6H);  $^{13}\text{C}$  NMR (75 MHz,  $\text{CDCl}_3$ ):  $\delta$  = 293.3, 175.9, 152.4, 145.5, 139.5, 138.1, 135.9, 129.5, 129.0, 124.7, 122.4, 122.2, 112.9, 75.1, 21.2, 19.0. HRMS (ESI):  $m/z$  (%): calcd for  $\text{C}_{31}\text{H}_{36}\text{Cl}_2\text{N}_2\text{ORuNa}$ : 647.1146; found: 647.1127 [ $\text{M}^+\text{+Na}$ ]; IR (KBr) = 3410, 2920, 1620, 1480, 1310, 1110, 932, 751.

**$\text{Cl}_2\text{Ru}(=\text{CH}-o\text{-O}-i\text{-PrC}_6\text{H}_4)\text{Mes}(\text{BIAN})$  (3)**

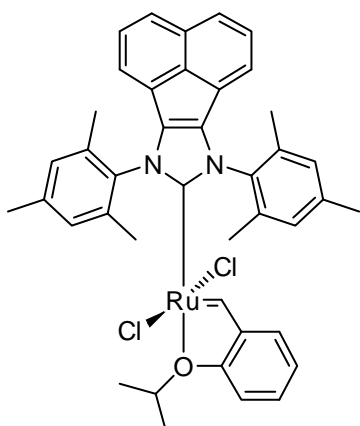

The complex with Mes(BIAN) was prepared using the general method described previously. The dark brown residue was dissolved in a 1:10 v/v mixture of  $\text{CH}_2\text{Cl}_2$  and methanol at room temperature. After concentration of this solution to ca. one-fourth of the initial volume using the rotary evaporator red crystals were precipitated. These crystals were filtered off on a Büchner funnel. The red crystals were washed twice with MeOH and dried in vacuo to give pure catalyst of ruthenium (94.3 mg, 76% yield).



$^1\text{H}$  NMR (300 MHz,  $\text{CDCl}_3$ ):  $\delta$  = 16.85 (s, 1H), 7.69 (d,  $J$  = 8.1 Hz, 2H), 7.51 (ddd,  $J$  = 8.4, 7.5 and 1.7 Hz, 1H), 7.38 (d,  $J$  = 8.3 Hz, 1H), 7.36 (d,  $J$  = 8.3 Hz, 1H), 7.20 (s, 4H), 7.05 (dd,  $J$  = 7.5 and 1.5 Hz, 1H), 6.96 - 6.84 (m, 4H), 4.98 (sept,  $J$  = 6.1 Hz, 1H), 2.51 (s, 6H), 2.37 (s, 12H), 1.41 (d,  $J$  = 6.1 Hz, 6H);  $^{13}\text{C}$  NMR (75 MHz,  $\text{CDCl}_3$ ):  $\delta$  = 293.22, 183.93, 152.50, 145.47, 139.71, 139.31, 137.86, 134.54, 129.52, 129.34, 129.23, 127.52, 127.48, 126.03, 122.46, 119.95, 113.03, 75.25, 21.35, 21.21, 19.19; IR (KBr) = 3410, 2920, 1740, 1610, 1490, 1240, 1110, 931, 753.

### Bis-(2,6-dimethylphenyl)-diazabutadiene

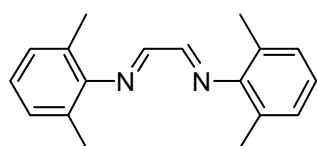

The compound bisimine was prepared using the method published by Türkmen *et al.*<sup>6</sup> To a solution of 2,6-dimethylaniline (3.4 mL, 27.57 mmol) in 275 mL of ethanol was added at 25°C a mixture of a 40% aqueous solution of glyoxal (1.6 mL, 34.46 mmol). The mixture was stirred for 24 h at room temperature. The resulting yellow solution was concentrated using rotary evaporator and the yellow precipitate was collected by filtration and dried in vacuum (3.46 g, 95% yield). The  $^1\text{H}$  and  $^{13}\text{C}$  NMR spectra were consistent with the reported data.<sup>7</sup>

$^1\text{H}$  NMR (300 MHz,  $\text{CDCl}_3$ ):  $\delta$  = 8.12 (s, 2H), 7.10 (d,  $J$  = 7.0 Hz, 4H), 7.01 (d,  $J$  = 8.5 Hz, 1H), 6.99 (d,  $J$  = 8.4 Hz, 1H), 2.19 (s, 12H);  $^{13}\text{C}$  NMR (75 MHz,  $\text{CDCl}_3$ ):  $\delta$  = 163.45, 149.85, 128.28, 126.42, 124.77, 18.22.

### 1,3-Bis-(2,6-dimethylphenyl)-1H-imidazol-3-ium trifluoromethanesulfonate

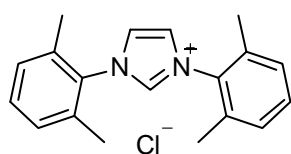

Bis-(2,6-dimethylphenyl)-diazabutadiene (1.00 g, 3.78 mmol) and ethoxy(methyl)chloride (7.0 mL, 75.65 mmol) were added to a Schlenk under nitrogen atmosphere. The reaction mixture was stirred at 100°C for 24 h. The reaction mixture is cooled at room temperature. The homogeneous solution was concentrated and the residue was dissolved in MeOH. The pure compound was

obtained by precipitation with diethyl ether, filtration and drying under vacuum (567 mg, 48% yield). The  $^1\text{H}$  and  $^{13}\text{C}$  NMR spectra were consistent with the reported data.<sup>8</sup>

$^1\text{H}$  NMR (300 MHz,  $\text{CDCl}_3$ ):  $\delta$  = 9.37 (s, 1H), 7.60 (d,  $J$  = 1.4 Hz, 2H), 7.39 (d,  $J$  = 7.3 Hz, 1H), 7.37 (d,  $J$  = 7.3 Hz, 1H), 7.23 (d,  $J$  = 7.7 Hz, 4H), 2.16 (s, 12H);  $^{13}\text{C}$  NMR (75 MHz,  $\text{CDCl}_3$ ):  $\delta$  = 137.91, 134.39, 132.83, 131.22, 129.25, 124.82, 17.31.

**1,3-bis(2,6-dimethylphenyl)-2,3-dihydro-1H-imidazole  $\text{Cl}_2\text{Ru}(=\text{CH}-o\text{-O-}i\text{-PrC}_6\text{H}_4)$  (4)**

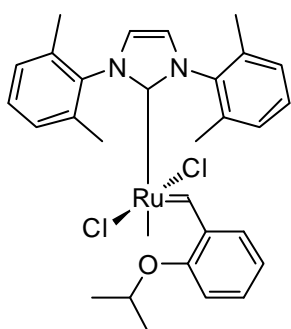

This ruthenium complex was prepared using the general method described previously. The pure product (55.8 mg, 56% yield) was obtained by purification by column chromatography (hexane/ethyl acetate).

$^1\text{H}$  NMR (300 MHz,  $\text{CD}_2\text{Cl}_2$ ):  $\delta$  = 16.52 (s, 1H), 7.60 (ddd,  $J$  = 8.4, 7.4 and 1.7 Hz, 1H), 7.52 (d,  $J$  = 8.1 Hz, 1H), 7.50 (d,  $J$  = 8.1 Hz, 1H), 7.36 (d,  $J$  = 8.0 Hz, 4H), 7.24 (s, 2H), 7.11 (dd,  $J$  = 7.6 and 1.6 Hz, 1H), 6.97 (td,  $J$  = 7.4 and 0.7 Hz, 1H), 6.90 (d,  $J$  = 8.4 Hz, 1H), 4.96 (sept,  $J$  = 6.2 Hz, 1H), 2.35 (s, 12H), 1.36 (d,  $J$  = 6.2 Hz, 6H);  $^{13}\text{C}$  NMR (75 MHz,  $\text{CD}_2\text{Cl}_2$ ):  $\delta$  = 289.0, 174.9, 152.3, 145.3, 138.4, 129.7, 129.1, 128.5, 125.0, 122.6, 121.9, 113.1, 75.4, 21.1, 19.0; HRMS (ESI):  $m/z$  (%): calcd for  $\text{C}_{29}\text{H}_{32}\text{N}_2\text{ORuNa}$ : 549.1456; found: 549.1497 [ $\text{M}^+ - \text{Cl}_2 + \text{Na}$ ]; IR (KBr) = 3410, 2920, 1620, 1480, 1310, 1110, 936, 749.

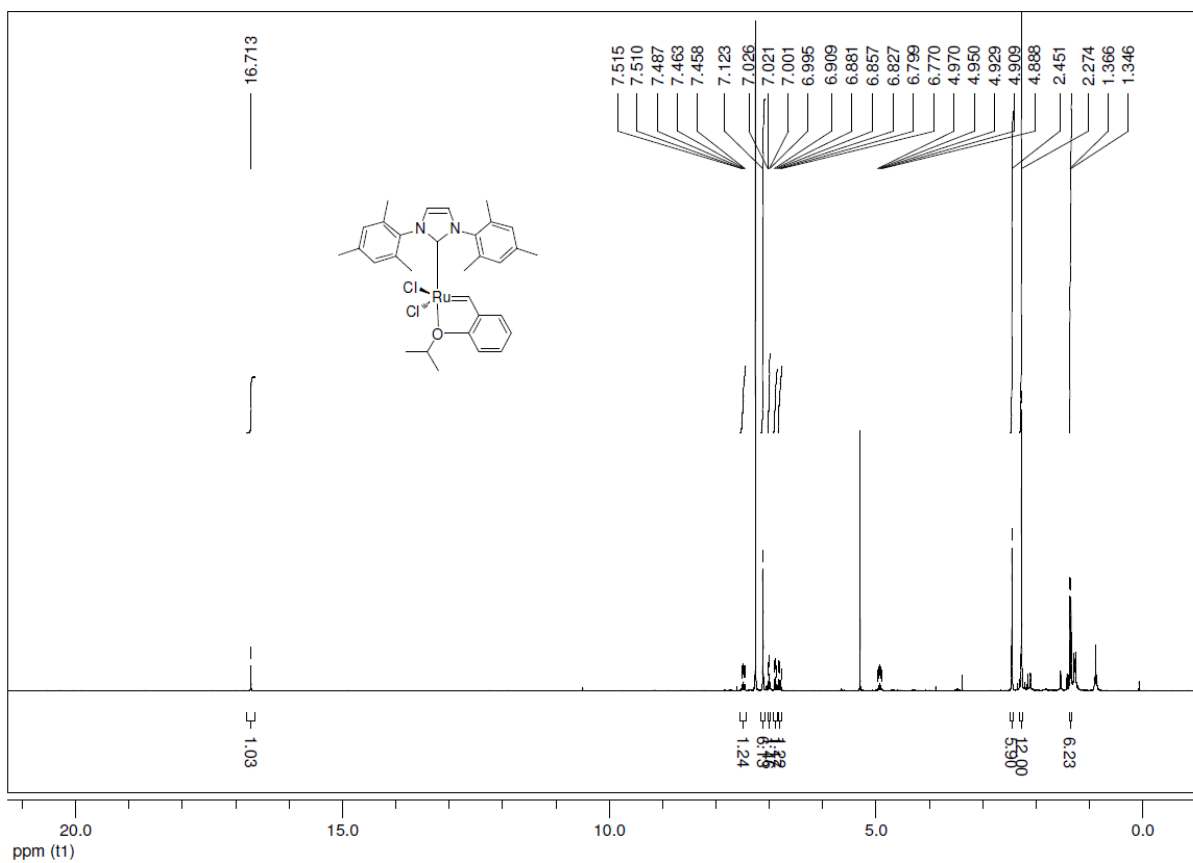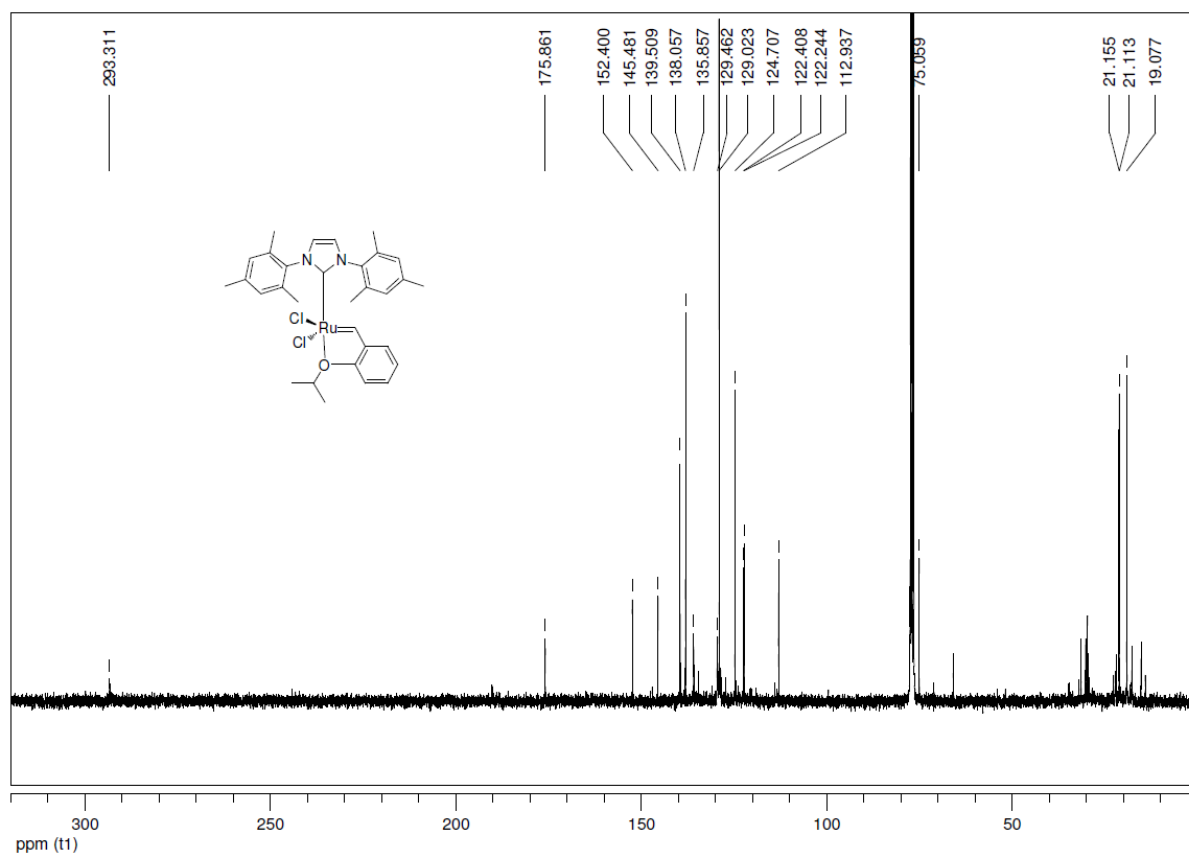

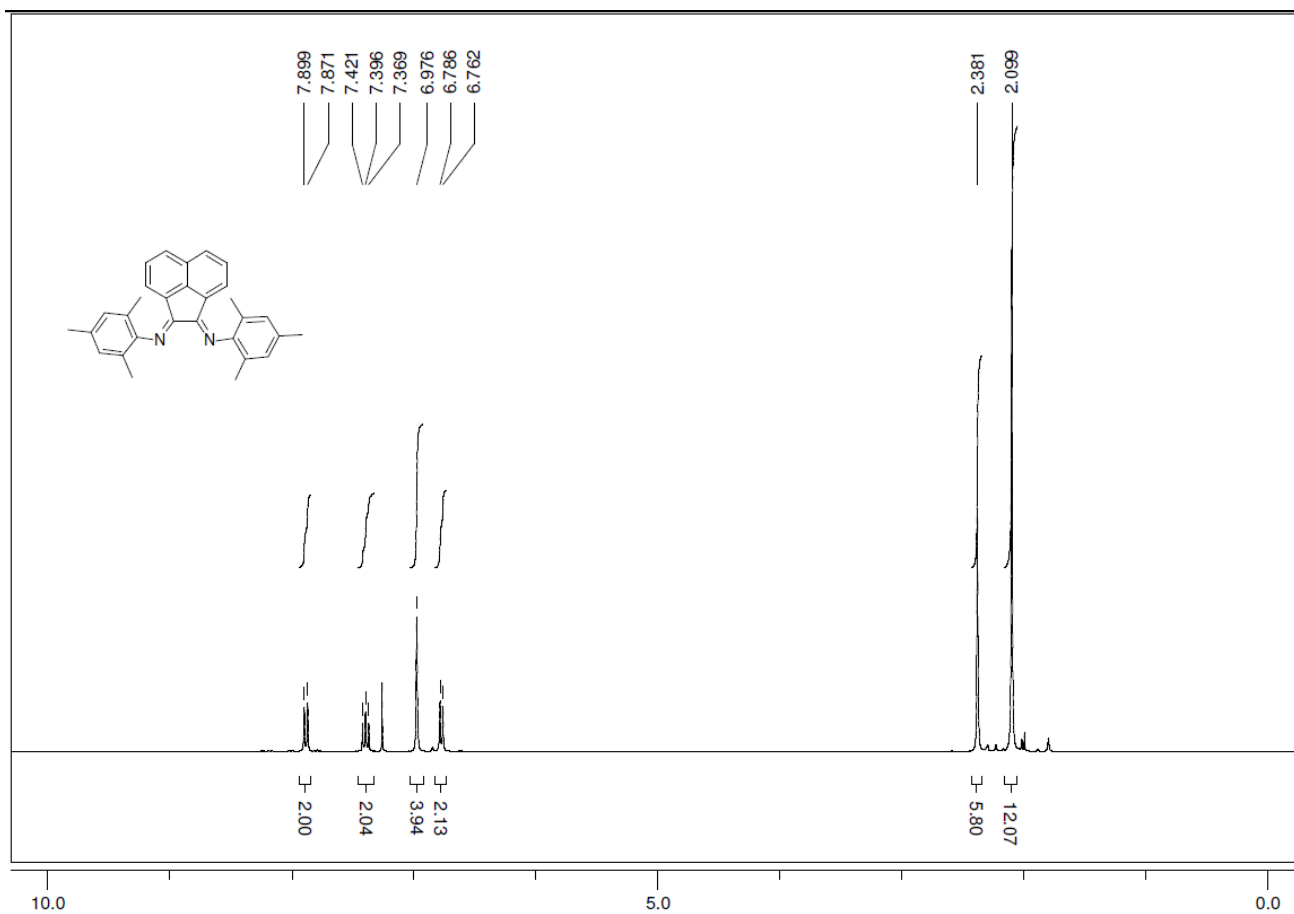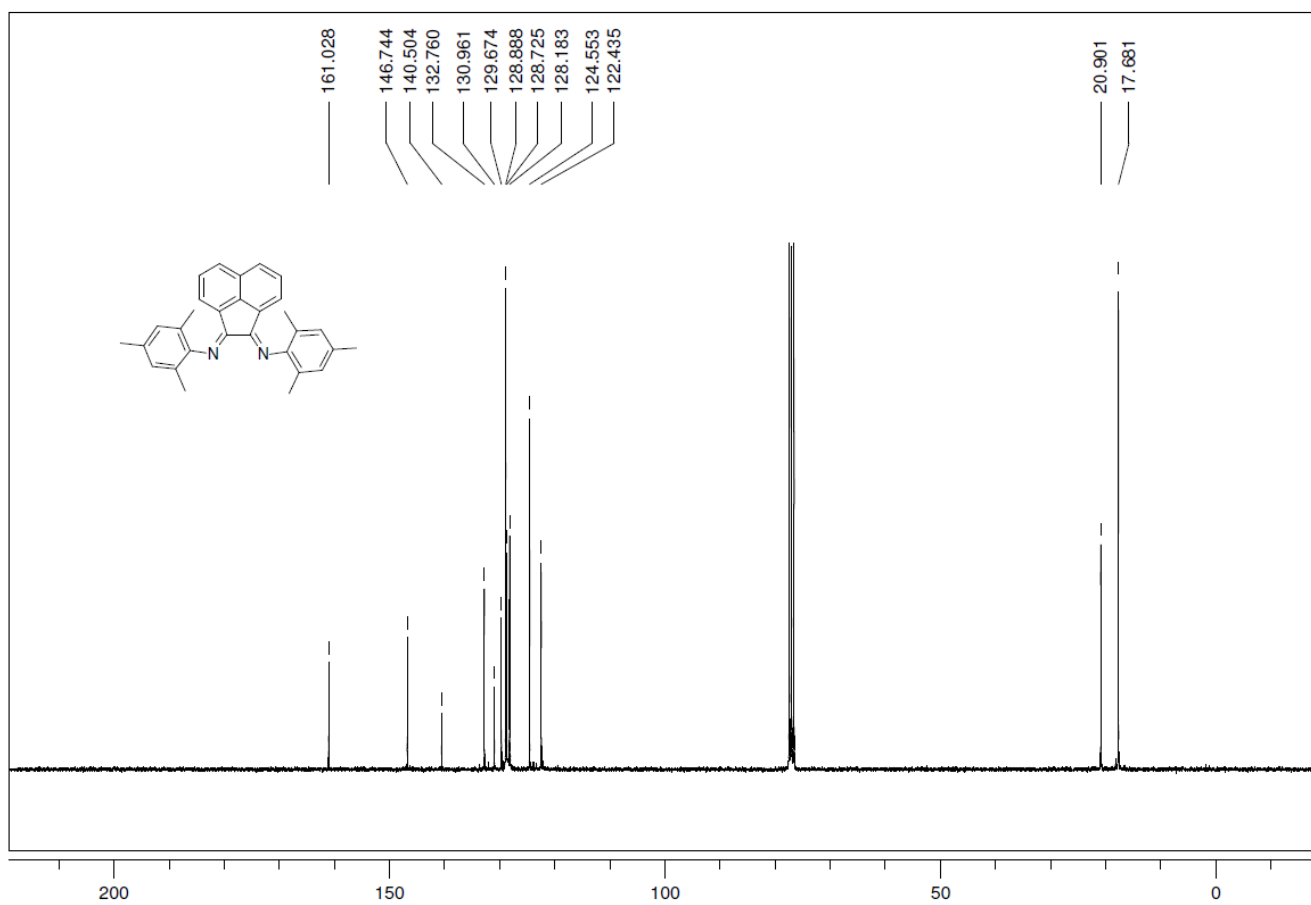

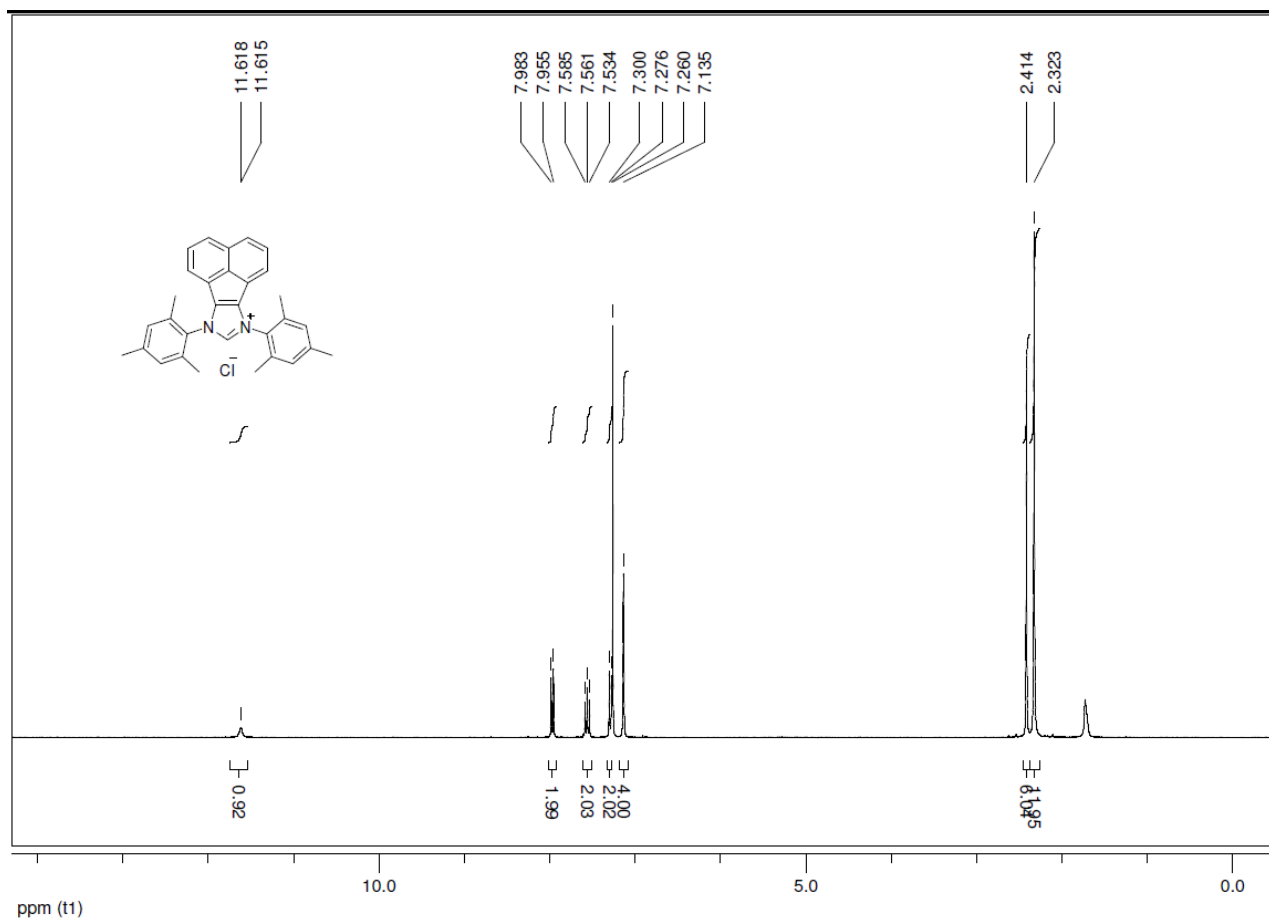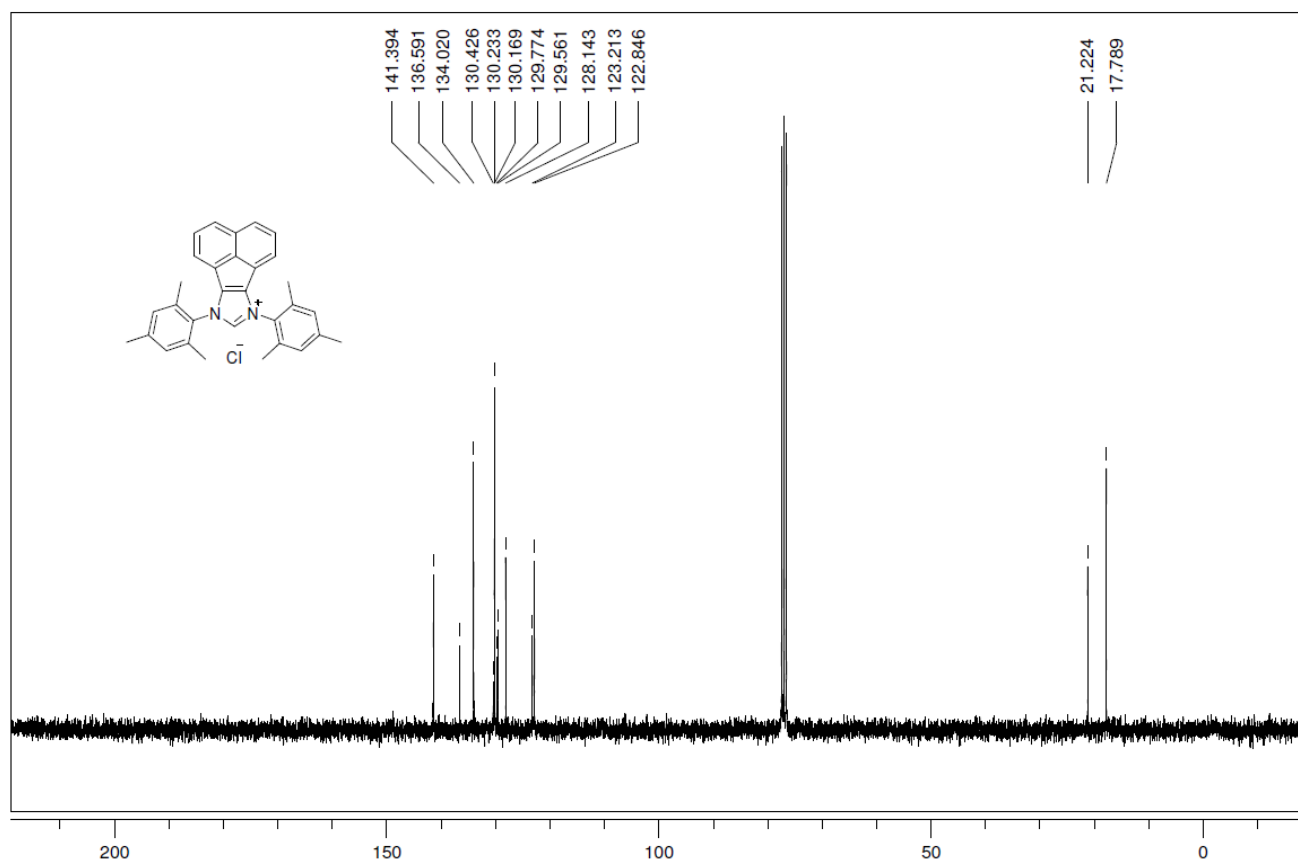

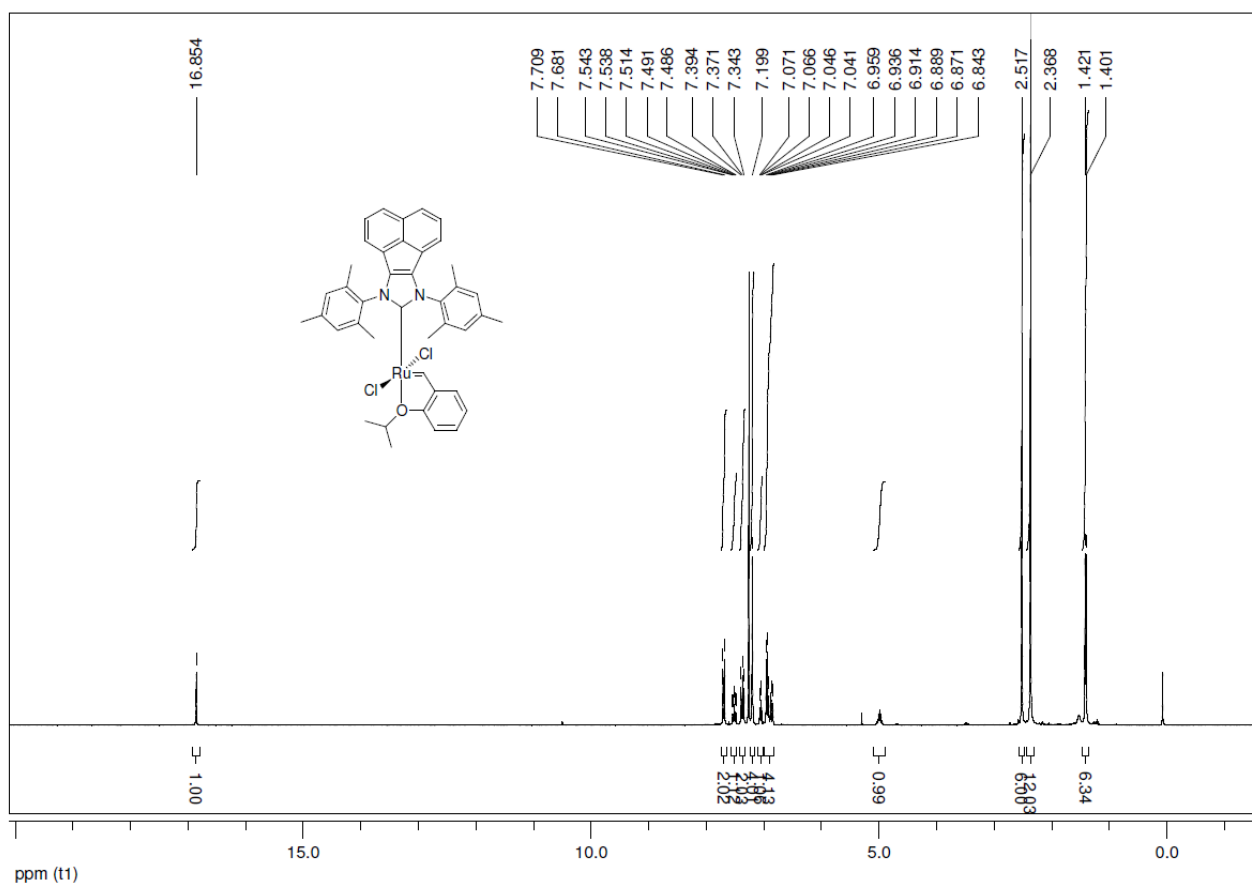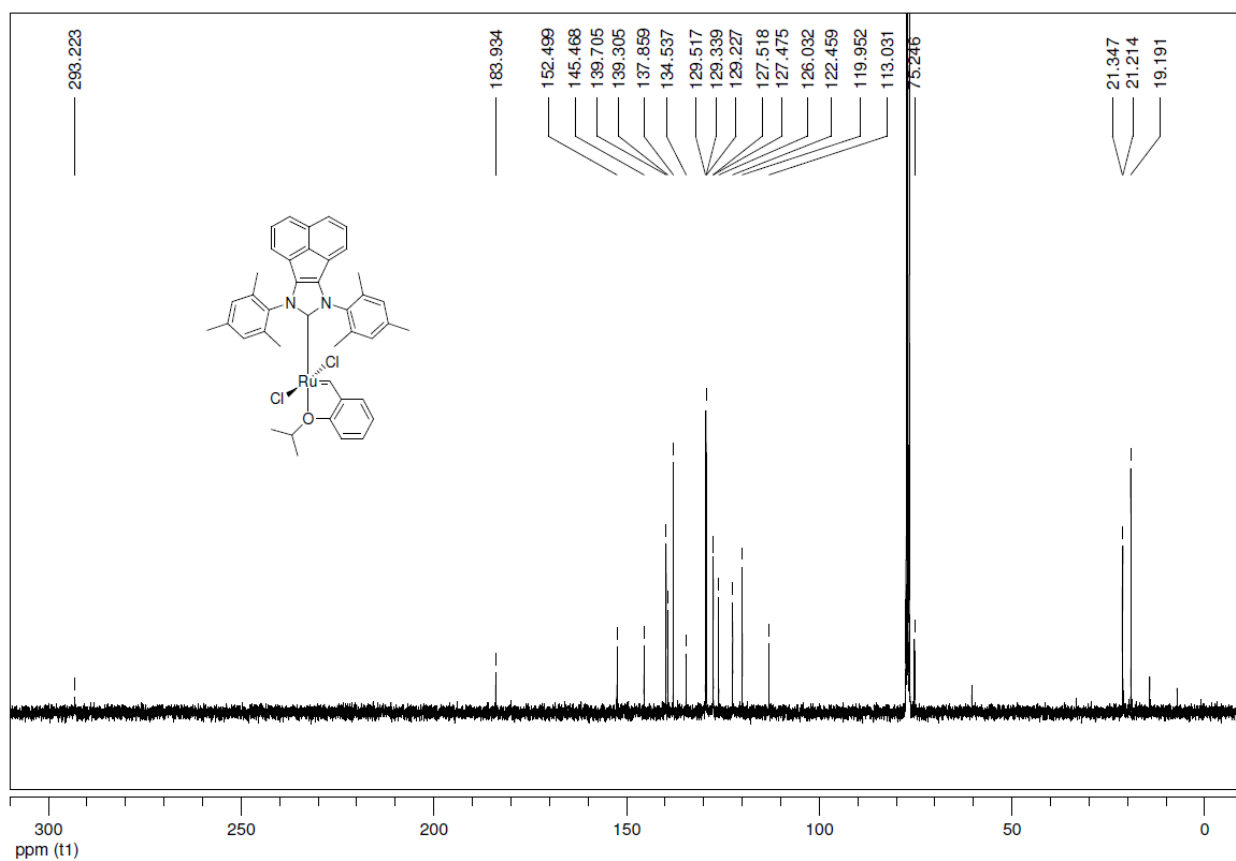

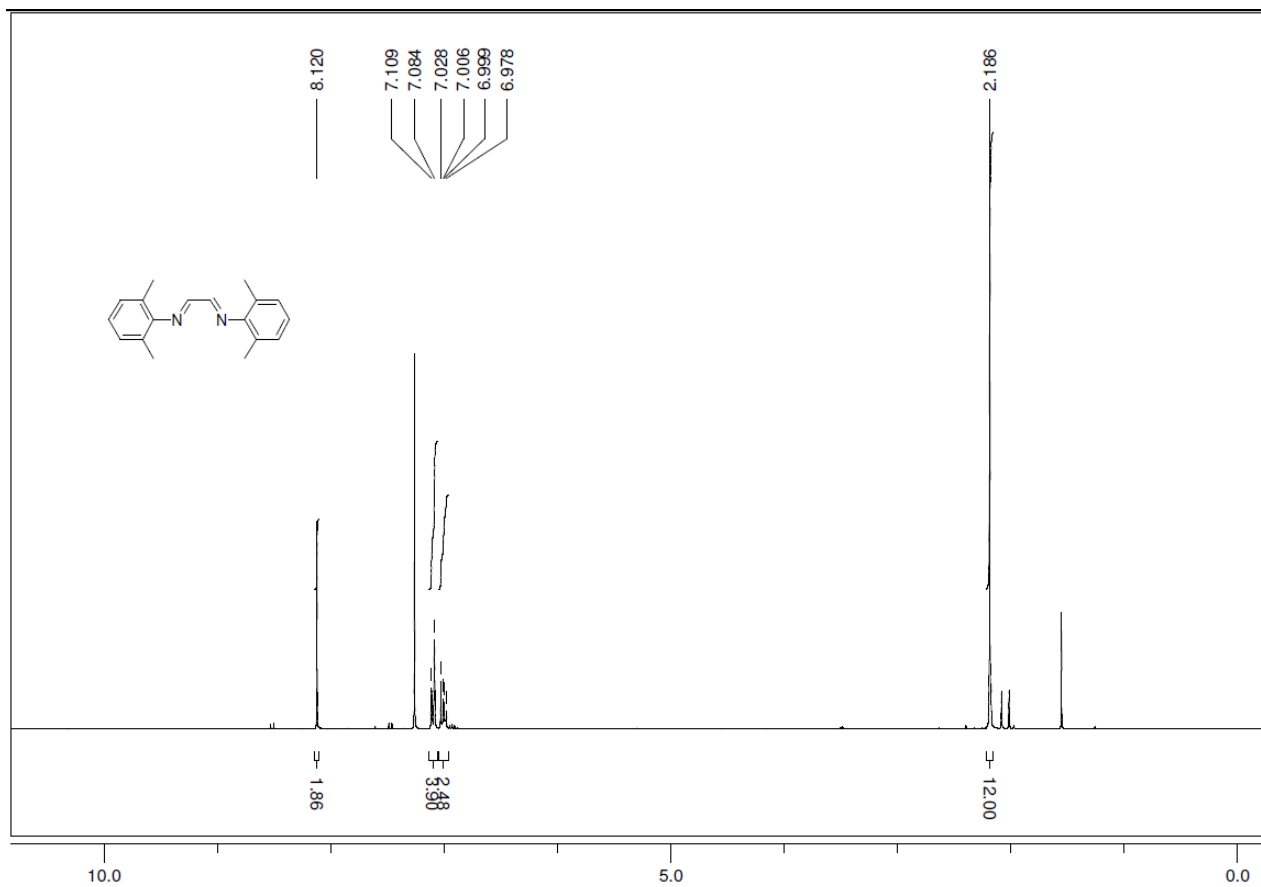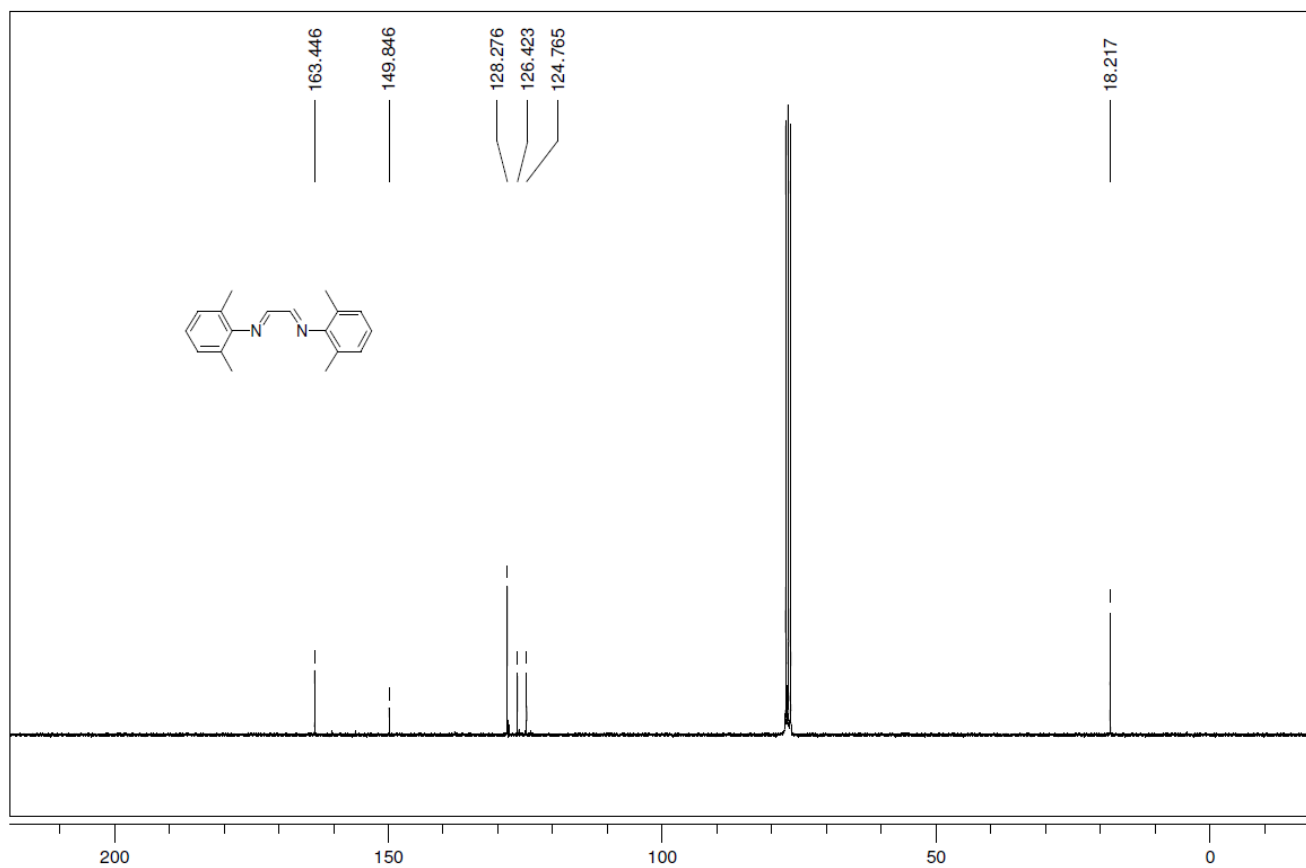

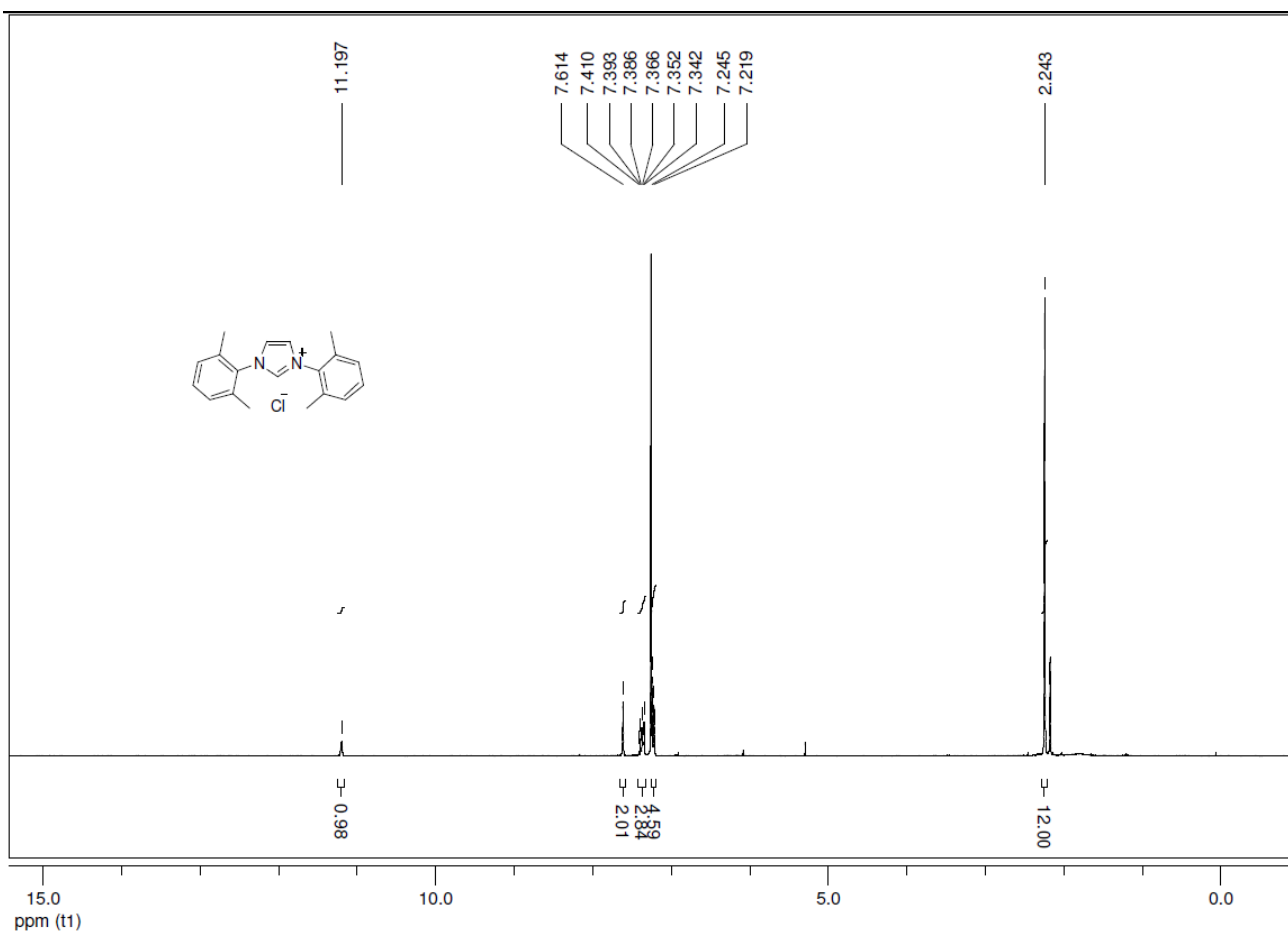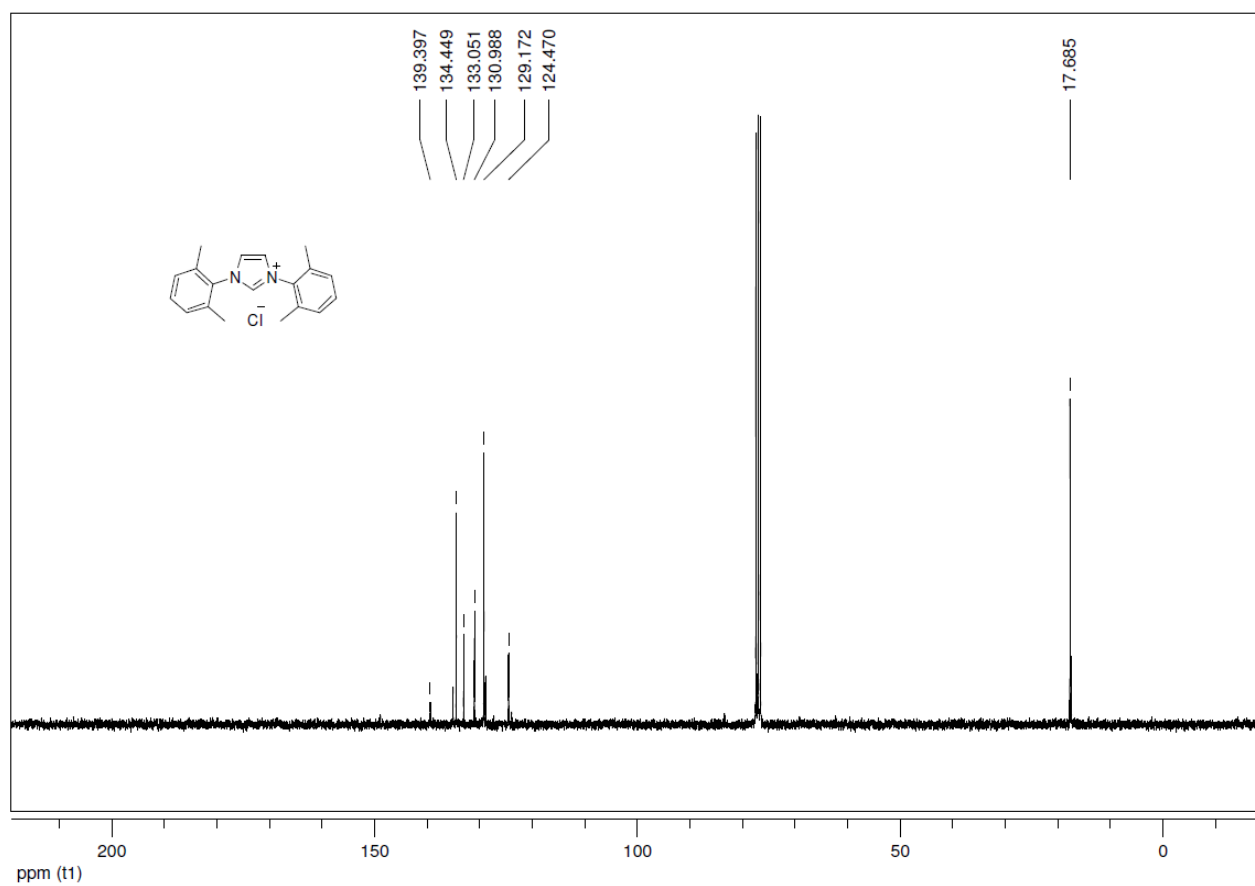



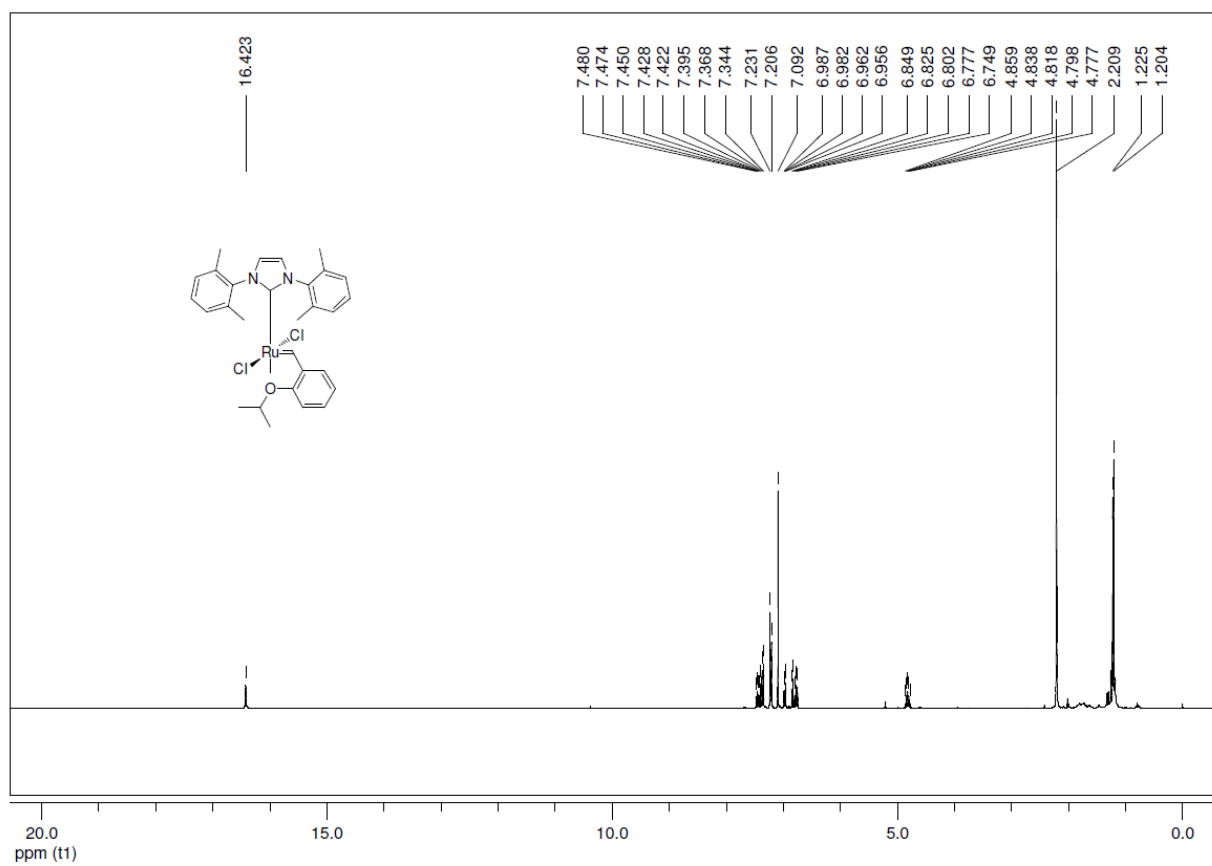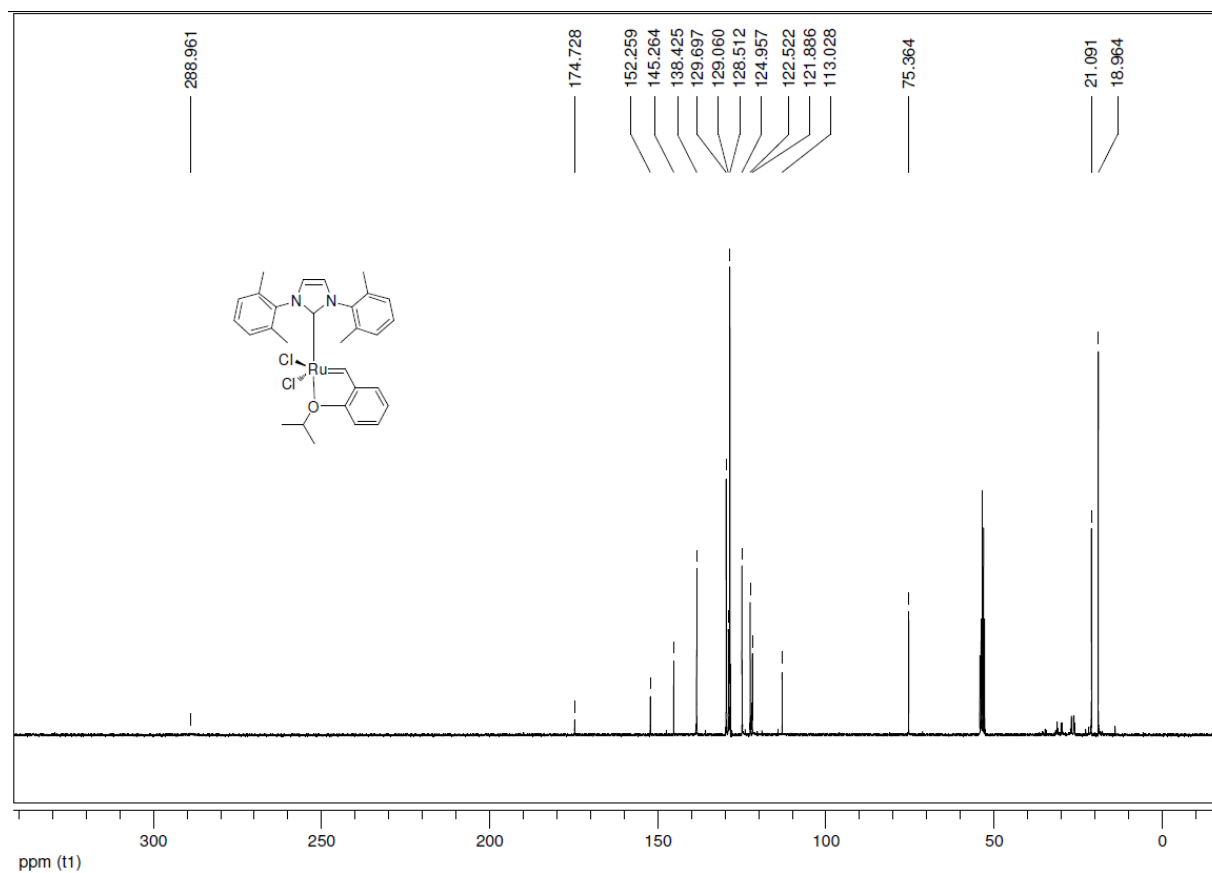

### **<sup>1</sup>H-NMR Stability in air of the ruthenium complexes**

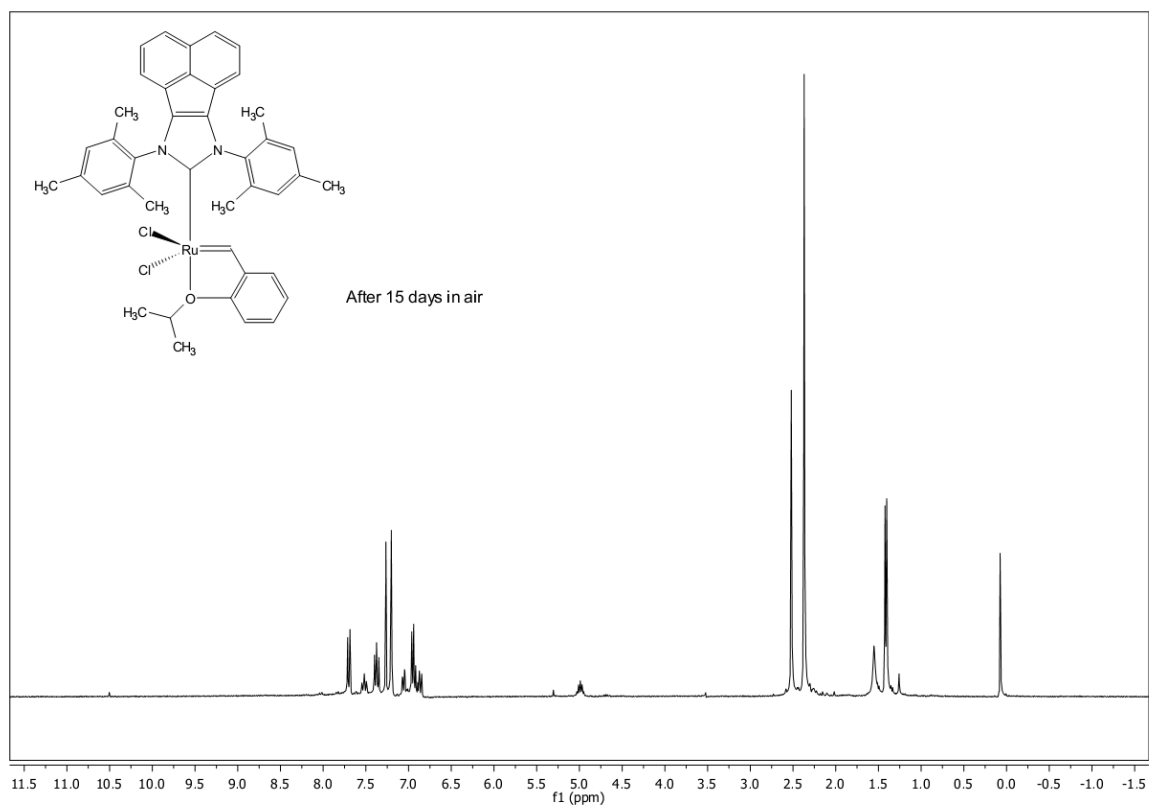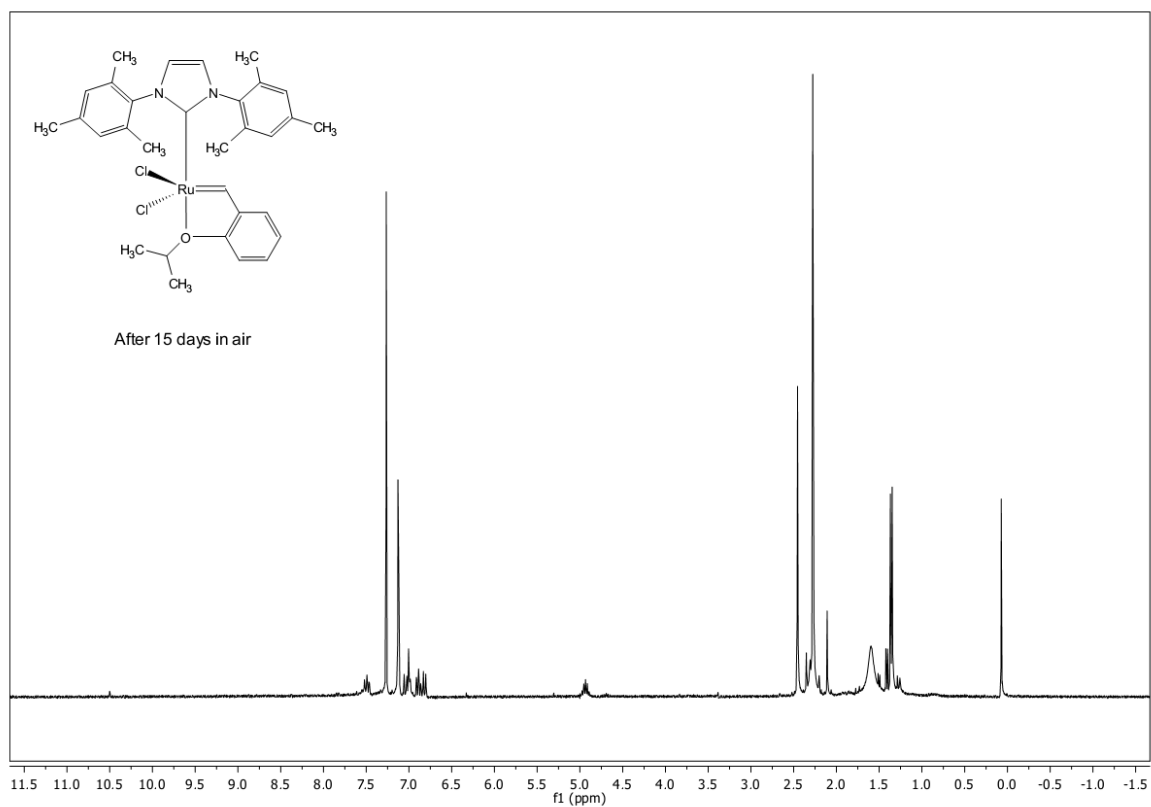

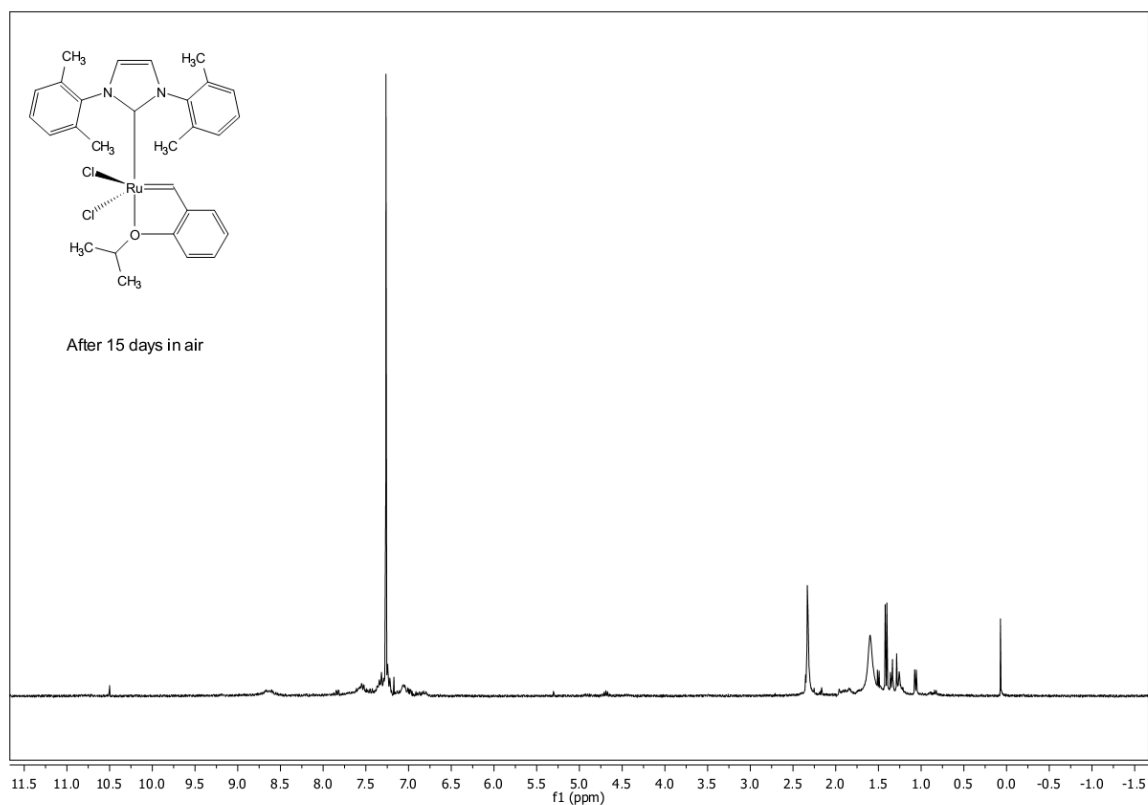

- 
- (<sup>1</sup>) Dastgir, S.; Coleman, K. S.; Cowley, A. R.; Green, M. L. H. *Organometallics*, **2010**, *29*, 4858.
- (<sup>2</sup>) El-Ayaan, U.; Murata, F.; El-Derby, S.; Fukuda, Y. *J. Mol. Struct.* **2004**, *692*, 209.
- (<sup>3</sup>) Butorac, R. R.; Al-Deyab, S. S.; Cowley, A. H. *Molecules*, **2011**, *16*, 3168.
- (<sup>4</sup>) K. V. Vasudevan, R. R. Butorac, C. D. Abernethy, A. H. Cowley, *Dalton Trans.* **2010**, *39*, 7401.
- (<sup>5</sup>) Bieniek, M.; Michrowska, A.; Gułajski, Ł.; Grela, K. *Organometallics*, **2007**, *26*, 1096.
- (<sup>6</sup>) Türkmen, H.; Çetinkaya, B. *J. Organometall. Chem.* **2006**, *691*, 3749.
- (<sup>7</sup>) Dieck, H. T.; Svoboda, M.; Greiser, T. *Z. Naturforsch. B*, **1981**, *36*, 823.
- (<sup>8</sup>) Delaude, L.; Szypa, M.; Demonceau A.; Noels, A. F. *Adv. Synth. Cat.* **2002**, *344*, 749.

## Supporting Information Part 2- X Ray

### Synthesis and characterization of new ruthenium *N*-heterocyclic carbene Hoveyda II-type complexes. Study of reactivity in ring closing metathesis reaction

Estíbaliz Merino,\* Evelyne Poli, Urbano Díaz\* and Daniel Brunel

|                  | <b>Page</b>                                        |    |
|------------------|----------------------------------------------------|----|
| <b>Figure S1</b> | ORTEP Plot for complex <b>3</b>                    | 2  |
| <b>Table S1</b>  | Crystal data and structure refinement for <b>3</b> | 3  |
| <b>Table S2</b>  | Atomic coordinates for <b>3</b>                    | 4  |
| <b>Table S3</b>  | Bond lengths for <b>3</b>                          | 6  |
| <b>Table S4</b>  | Bond angles for <b>3</b>                           | 10 |
| <b>Table S5</b>  | Anisotropic displacement parameters for <b>3</b>   | 16 |
| <b>Table S6</b>  | Hydrogen coordinates for <b>3</b>                  | 18 |
| <b>Table S7</b>  | Torsion angles for <b>3</b>                        | 20 |
|                  |                                                    |    |
| <b>Figure S2</b> | ORTEP Plot for complex <b>4</b>                    | 25 |
| <b>Table S8</b>  | Crystal data and structure refinement for <b>4</b> | 26 |
| <b>Table S9</b>  | Atomic coordinates for <b>4</b>                    | 27 |
| <b>Table S10</b> | Bond lengths for <b>4</b>                          | 31 |
| <b>Table S11</b> | Bond angles for <b>4</b>                           | 37 |
| <b>Table S12</b> | Anisotropic displacement parameters for <b>4</b>   | 48 |
| <b>Table S13</b> | Hydrogen coordinates for <b>4</b>                  | 52 |
| <b>Table S14</b> | Torsion angles for <b>4</b>                        | 55 |

**Figure S1.** ORTEP plot for 1,3-dimesityl-acenaphthylenyl-4,5-imidazolin-2-ylidene ruthenium isopropoxybenzylidene dichloride **3**

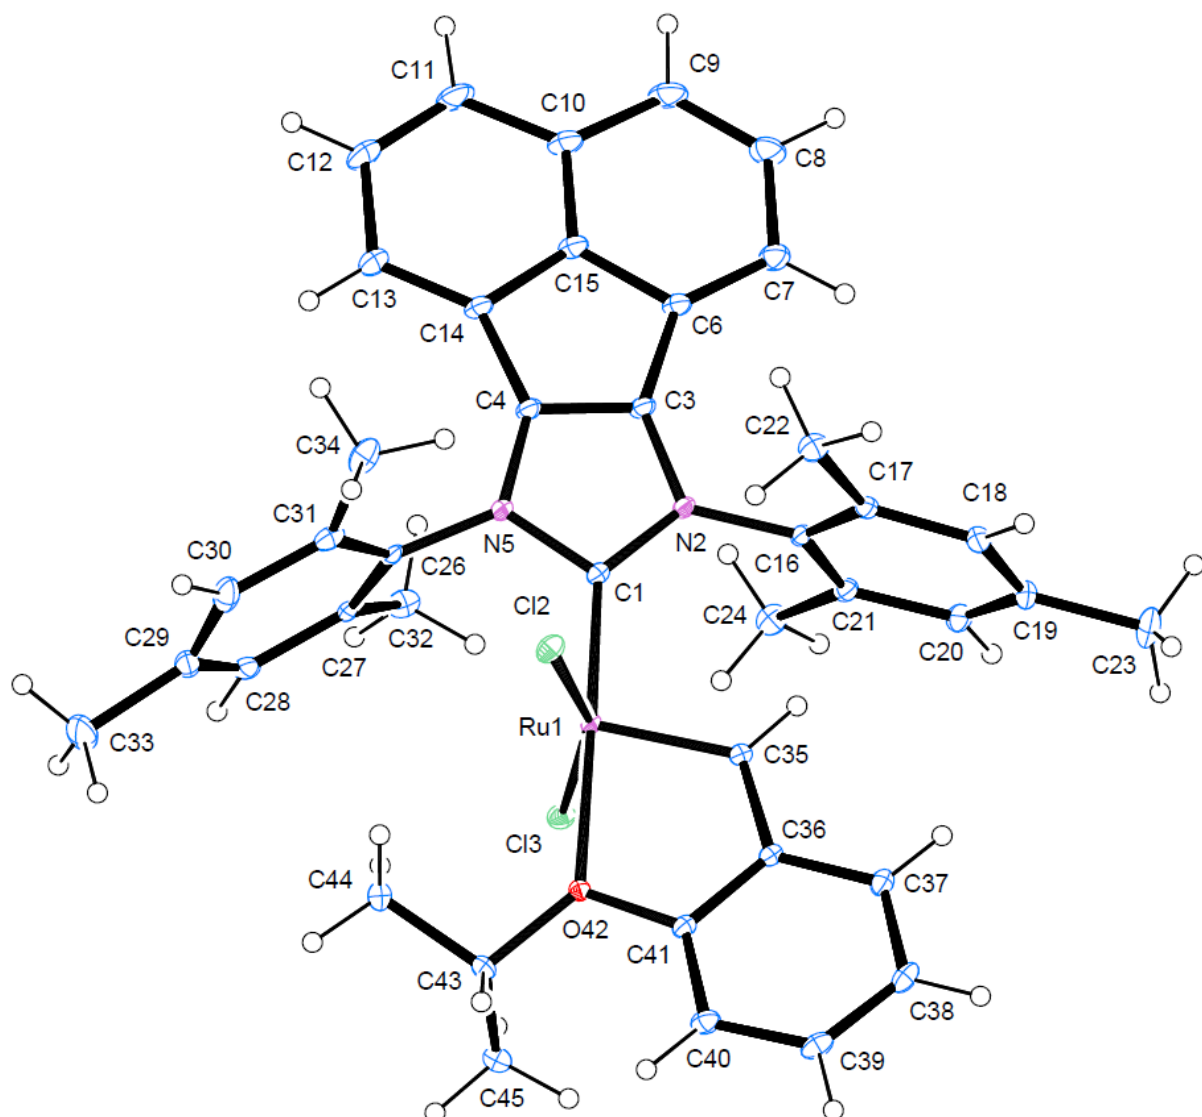

**Table S1.** Crystal data and structure refinement for **3**.

|                                   |                                                                                                                                                   |
|-----------------------------------|---------------------------------------------------------------------------------------------------------------------------------------------------|
| Identification code               | cc01emm1n                                                                                                                                         |
| Empirical formula                 | C <sub>41</sub> H <sub>40</sub> Cl <sub>2</sub> N <sub>2</sub> ORu, 0.59(C <sub>2</sub> H <sub>5</sub> O), 0.41(CH <sub>2</sub> Cl <sub>2</sub> ) |
| Formula weight                    | 801.10                                                                                                                                            |
| Temperature                       | 100(2) K                                                                                                                                          |
| Wavelength                        | 0.71073 Å                                                                                                                                         |
| Crystal system                    | Monoclinic                                                                                                                                        |
| Space group                       | <i>P</i> 2 <sub>1</sub> / <i>c</i>                                                                                                                |
| Unit cell dimensions              | <i>a</i> = 20.7100(5) Å $\alpha = 90^\circ$<br><i>b</i> = 10.3621(3) Å $\beta = 107.433(1)^\circ$<br><i>c</i> = 18.7711(4) Å $\gamma = 90^\circ$  |
| Volume                            | 3843.23(17) Å <sup>3</sup>                                                                                                                        |
| <i>Z</i>                          | 4                                                                                                                                                 |
| Density (calculated)              | 1.385 Mg/m <sup>3</sup>                                                                                                                           |
| Absorption coefficient            | 0.635 mm <sup>-1</sup>                                                                                                                            |
| F(000)                            | 1654                                                                                                                                              |
| Crystal size                      | 0.37 x 0.31 x 0.08 mm <sup>3</sup>                                                                                                                |
| Theta range for data collection   | 2.06 to 30.51°                                                                                                                                    |
| Index ranges                      | -29 ≤ <i>h</i> ≤ 27, 0 ≤ <i>k</i> ≤ 14, 0 ≤ <i>l</i> ≤ 26                                                                                         |
| Reflections collected             | 76624                                                                                                                                             |
| Independent reflections           | 11645 [R(int) = 0.0263]                                                                                                                           |
| Completeness to theta = 30.51°    | 99.2 %                                                                                                                                            |
| Absorption correction             | Semi-empirical from equivalents                                                                                                                   |
| Max. and min. transmission        | 0.8959 and 0.7846                                                                                                                                 |
| Refinement method                 | Full-matrix least-squares on F <sup>2</sup>                                                                                                       |
| Data / restraints / parameters    | 11645 / 375 / 589                                                                                                                                 |
| Goodness-of-fit on F <sup>2</sup> | 1.049                                                                                                                                             |
| Final R indices [I > 2σ(I)]       | R1 = 0.0269, wR2 = 0.0622                                                                                                                         |
| R indices (all data)              | R1 = 0.0330, wR2 = 0.0650                                                                                                                         |
| Largest diff. peak and hole       | 1.001 and -0.534 e.Å <sup>-3</sup>                                                                                                                |

**Table S2.** Atomic coordinates ( $\times 10^4$ ) and equivalent isotropic displacement parameters ( $\text{\AA}^2 \times 10^3$ ) for **3**.  $U(\text{eq})$  is defined as one third of the trace of the orthogonalized  $U^{ij}$  tensor.

|       | x       | y        | z       | U(eq) |
|-------|---------|----------|---------|-------|
| Ru(1) | 1566(1) | 134(1)   | 2347(1) | 11(1) |
| Cl(2) | 1876(1) | -1517(1) | 1668(1) | 18(1) |
| Cl(3) | 1306(1) | 1154(1)  | 3345(1) | 17(1) |
| C(1)  | 2462(1) | 980(1)   | 2557(1) | 13(1) |
| N(2)  | 2689(1) | 2091(1)  | 2307(1) | 13(1) |
| C(3)  | 3379(1) | 2238(1)  | 2636(1) | 15(1) |
| C(4)  | 3595(1) | 1214(1)  | 3099(1) | 15(1) |
| N(5)  | 3041(1) | 445(1)   | 3051(1) | 14(1) |
| C(6)  | 3936(1) | 3129(1)  | 2682(1) | 17(1) |
| C(7)  | 4034(1) | 4288(2)  | 2378(1) | 23(1) |
| C(8)  | 4697(1) | 4835(2)  | 2606(1) | 29(1) |
| C(9)  | 5236(1) | 4237(2)  | 3105(1) | 29(1) |
| C(10) | 5148(1) | 3034(2)  | 3431(1) | 24(1) |
| C(11) | 5646(1) | 2297(2)  | 3965(1) | 30(1) |
| C(12) | 5479(1) | 1163(2)  | 4238(1) | 31(1) |
| C(13) | 4806(1) | 652(2)   | 4008(1) | 24(1) |
| C(14) | 4318(1) | 1337(1)  | 3491(1) | 18(1) |
| C(15) | 4497(1) | 2520(1)  | 3211(1) | 18(1) |
| C(16) | 2284(1) | 2997(1)  | 1778(1) | 13(1) |
| C(17) | 2199(1) | 2792(1)  | 1022(1) | 15(1) |
| C(18) | 1780(1) | 3643(2)  | 514(1)  | 19(1) |
| C(19) | 1473(1) | 4683(2)  | 754(1)  | 22(1) |
| C(20) | 1590(1) | 4875(1)  | 1517(1) | 21(1) |
| C(21) | 1992(1) | 4031(1)  | 2044(1) | 16(1) |
| C(22) | 2535(1) | 1662(2)  | 772(1)  | 21(1) |
| C(23) | 1028(1) | 5605(2)  | 193(1)  | 36(1) |
| C(24) | 2092(1) | 4201(2)  | 2866(1) | 22(1) |
| C(26) | 3010(9) | -577(8)  | 3541(6) | 14(1) |
| C(27) | 2899(6) | -252(7)  | 4224(4) | 15(1) |
| C(28) | 2784(4) | -1265(7) | 4660(4) | 23(1) |
| C(29) | 2823(3) | -2541(7) | 4465(4) | 26(1) |
| C(30) | 3032(5) | -2817(7) | 3847(5) | 28(1) |

|        |          |           |          |       |
|--------|----------|-----------|----------|-------|
| C(31)  | 3133(6)  | -1847(8)  | 3373(5)  | 21(1) |
| C(32)  | 2946(6)  | 1117(7)   | 4486(5)  | 21(1) |
| C(33)  | 2648(3)  | -3627(8)  | 4915(4)  | 44(2) |
| C(34)  | 3414(7)  | -2176(12) | 2740(6)  | 27(1) |
| C(76)  | 3053(14) | -740(14)  | 3504(10) | 18(2) |
| C(77)  | 2914(10) | -563(14)  | 4182(8)  | 26(2) |
| C(78)  | 2847(7)  | -1672(17) | 4573(7)  | 35(2) |
| C(79)  | 2925(9)  | -2870(14) | 4316(7)  | 42(3) |
| C(80)  | 3117(10) | -2987(12) | 3678(9)  | 38(3) |
| C(81)  | 3195(9)  | -1928(9)  | 3248(8)  | 19(2) |
| C(82)  | 2906(9)  | 761(16)   | 4497(9)  | 31(2) |
| C(83)  | 2834(12) | -4063(17) | 4746(8)  | 84(6) |
| C(84)  | 3446(11) | -2072(19) | 2584(10) | 31(2) |
| C(35)  | 1054(1)  | 1113(1)   | 1569(1)  | 14(1) |
| C(36)  | 365(1)   | 710(1)    | 1199(1)  | 13(1) |
| C(37)  | -56(1)   | 1328(1)   | 563(1)   | 16(1) |
| C(38)  | -701(1)  | 863(2)    | 217(1)   | 20(1) |
| C(39)  | -929(1)  | -224(2)   | 504(1)   | 21(1) |
| C(40)  | -530(1)  | -857(1)   | 1139(1)  | 18(1) |
| C(41)  | 115(1)   | -374(1)   | 1480(1)  | 14(1) |
| O(42)  | 576(1)   | -893(1)   | 2101(1)  | 15(1) |
| C(43)  | 343(1)   | -1832(1)  | 2560(1)  | 18(1) |
| C(44)  | 980(1)   | -2414(2)  | 3085(1)  | 22(1) |
| C(45)  | -100(1)  | -1150(2)  | 2956(1)  | 23(1) |
| C(50)  | 4767(5)  | 1601(9)   | 434(6)   | 50(2) |
| Cl(51) | 4491(1)  | 2572(1)   | 1071(1)  | 41(1) |
| Cl(52) | 4059(1)  | 813(2)    | -197(1)  | 58(1) |
| O(60)  | 5000     | 0         | 0        | 79(1) |
| C(61)  | 5240(5)  | 1082(11)  | 491(5)   | 76(2) |
| C(62)  | 4885(9)  | 1965(17)  | 612(13)  | 98(5) |
| C(63)  | 5432(5)  | -962(11)  | -118(7)  | 73(2) |
| C(64)  | 5387(9)  | -1870(20) | -583(13) | 83(4) |

---



**Table S3.** Bond lengths [ $\text{\AA}$ ] for **3**.

---

| Atom-atom   | Distance   |
|-------------|------------|
| Ru(1)-C(35) | 1.8341(13) |
| Ru(1)-C(1)  | 1.9820(13) |
| Ru(1)-O(42) | 2.2333(9)  |
| Ru(1)-Cl(2) | 2.3346(3)  |
| Ru(1)-Cl(3) | 2.3504(3)  |
| C(1)-N(2)   | 1.3778(17) |
| C(1)-N(5)   | 1.3923(16) |
| N(2)-C(3)   | 1.3832(16) |
| N(2)-C(16)  | 1.4397(16) |
| C(3)-C(4)   | 1.3595(19) |
| C(3)-C(6)   | 1.4601(19) |
| C(4)-N(5)   | 1.3780(17) |
| C(4)-C(14)  | 1.4621(18) |
| N(5)-C(26)  | 1.417(10)  |
| N(5)-C(76)  | 1.490(14)  |
| C(6)-C(7)   | 1.370(2)   |
| C(6)-C(15)  | 1.429(2)   |
| C(7)-C(8)   | 1.428(2)   |
| C(7)-H(7)   | 0.9500     |
| C(8)-C(9)   | 1.371(2)   |
| C(8)-H(8)   | 0.9500     |
| C(9)-C(10)  | 1.424(2)   |
| C(9)-H(9)   | 0.9500     |
| C(10)-C(15) | 1.3930(19) |
| C(10)-C(11) | 1.426(2)   |
| C(11)-C(12) | 1.368(3)   |
| C(11)-H(11) | 0.9500     |
| C(12)-C(13) | 1.431(2)   |
| C(12)-H(12) | 0.9500     |
| C(13)-C(14) | 1.371(2)   |
| C(13)-H(13) | 0.9500     |
| C(14)-C(15) | 1.426(2)   |
| C(16)-C(17) | 1.3935(19) |
| C(16)-C(21) | 1.3944(19) |
| C(17)-C(18) | 1.3948(19) |
| C(17)-C(22) | 1.507(2)   |

|              |           |
|--------------|-----------|
| C(18)-C(19)  | 1.393(2)  |
| C(18)-H(18)  | 0.9500    |
| C(19)-C(20)  | 1.393(2)  |
| C(19)-C(23)  | 1.512(2)  |
| C(20)-C(21)  | 1.395(2)  |
| C(20)-H(20)  | 0.9500    |
| C(21)-C(24)  | 1.504(2)  |
| C(22)-H(22A) | 0.9800    |
| C(22)-H(22B) | 0.9800    |
| C(22)-H(22C) | 0.9800    |
| C(23)-H(23A) | 0.9800    |
| C(23)-H(23B) | 0.9800    |
| C(23)-H(23C) | 0.9800    |
| C(24)-H(24A) | 0.9800    |
| C(24)-H(24B) | 0.9800    |
| C(24)-H(24C) | 0.9800    |
| C(26)-C(31)  | 1.395(7)  |
| C(26)-C(27)  | 1.409(7)  |
| C(27)-C(28)  | 1.396(6)  |
| C(27)-C(32)  | 1.495(6)  |
| C(28)-C(29)  | 1.382(6)  |
| C(28)-H(28)  | 0.9500    |
| C(29)-C(30)  | 1.384(6)  |
| C(29)-C(33)  | 1.515(6)  |
| C(30)-C(31)  | 1.399(7)  |
| C(30)-H(30)  | 0.9500    |
| C(31)-C(34)  | 1.509(7)  |
| C(32)-H(32A) | 0.9800    |
| C(32)-H(32B) | 0.9800    |
| C(32)-H(32C) | 0.9800    |
| C(33)-H(33A) | 0.9800    |
| C(33)-H(33B) | 0.9800    |
| C(33)-H(33C) | 0.9800    |
| C(34)-H(34A) | 0.9800    |
| C(34)-H(34B) | 0.9800    |
| C(34)-H(34C) | 0.9800    |
| C(76)-C(81)  | 1.384(10) |
| C(76)-C(77)  | 1.397(11) |
| C(77)-C(78)  | 1.394(10) |

|              |            |
|--------------|------------|
| C(77)-C(82)  | 1.496(10)  |
| C(78)-C(79)  | 1.359(10)  |
| C(78)-H(78)  | 0.9500     |
| C(79)-C(80)  | 1.374(10)  |
| C(79)-C(83)  | 1.519(9)   |
| C(80)-C(81)  | 1.400(10)  |
| C(80)-H(80)  | 0.9500     |
| C(81)-C(84)  | 1.496(10)  |
| C(82)-H(82A) | 0.9800     |
| C(82)-H(82B) | 0.9800     |
| C(82)-H(82C) | 0.9800     |
| C(83)-H(83A) | 0.9800     |
| C(83)-H(83B) | 0.9800     |
| C(83)-H(83C) | 0.9800     |
| C(84)-H(84A) | 0.9800     |
| C(84)-H(84B) | 0.9800     |
| C(84)-H(84C) | 0.9800     |
| C(35)-C(36)  | 1.4480(18) |
| C(35)-H(35)  | 0.9500     |
| C(36)-C(41)  | 1.4033(19) |
| C(36)-C(37)  | 1.4051(18) |
| C(37)-C(38)  | 1.385(2)   |
| C(37)-H(37)  | 0.9500     |
| C(38)-C(39)  | 1.390(2)   |
| C(38)-H(38)  | 0.9500     |
| C(39)-C(40)  | 1.394(2)   |
| C(39)-H(39)  | 0.9500     |
| C(40)-C(41)  | 1.3889(18) |
| C(40)-H(40)  | 0.9500     |
| C(41)-O(42)  | 1.3758(16) |
| O(42)-C(43)  | 1.4728(16) |
| C(43)-C(44)  | 1.516(2)   |
| C(43)-C(45)  | 1.518(2)   |
| C(43)-H(43)  | 1.0000     |
| C(44)-H(44A) | 0.9800     |
| C(44)-H(44B) | 0.9800     |
| C(44)-H(44C) | 0.9800     |
| C(45)-H(45A) | 0.9800     |
| C(45)-H(45B) | 0.9800     |

|              |           |
|--------------|-----------|
| C(45)-H(45C) | 0.9800    |
| C(50)-Cl(51) | 1.782(7)  |
| C(50)-Cl(52) | 1.784(9)  |
| C(50)-H(50A) | 0.9900    |
| C(50)-H(50B) | 0.9900    |
| O(60)-C(63)  | 1.401(12) |
| O(60)-C(61)  | 1.441(11) |
| C(61)-C(62)  | 1.237(15) |
| C(61)-H(61A) | 0.9900    |
| C(61)-H(61B) | 0.9900    |
| C(62)-H(62A) | 0.9800    |
| C(62)-H(62B) | 0.9800    |
| C(62)-H(62C) | 0.9800    |
| C(63)-C(64)  | 1.265(15) |
| C(63)-H(63A) | 0.9900    |
| C(63)-H(63B) | 0.9900    |
| C(64)-H(64A) | 0.9800    |
| C(64)-H(64B) | 0.9800    |
| C(64)-H(64C) | 0.9800    |

**Table S4.** Angles [°] for **3**.

---

| Atom-atom-atom    | Angle       |
|-------------------|-------------|
| C(35)-Ru(1)-C(1)  | 101.38(6)   |
| C(35)-Ru(1)-O(42) | 79.72(5)    |
| C(1)-Ru(1)-O(42)  | 177.71(5)   |
| C(35)-Ru(1)-Cl(2) | 99.09(4)    |
| C(1)-Ru(1)-Cl(2)  | 92.22(4)    |
| O(42)-Ru(1)-Cl(2) | 85.61(3)    |
| C(35)-Ru(1)-Cl(3) | 99.79(4)    |
| C(1)-Ru(1)-Cl(3)  | 93.87(4)    |
| O(42)-Ru(1)-Cl(3) | 87.91(3)    |
| Cl(2)-Ru(1)-Cl(3) | 158.585(13) |
| N(2)-C(1)-N(5)    | 104.19(11)  |
| N(2)-C(1)-Ru(1)   | 134.20(9)   |
| N(5)-C(1)-Ru(1)   | 121.60(10)  |
| C(1)-N(2)-C(3)    | 110.64(11)  |
| C(1)-N(2)-C(16)   | 126.26(11)  |
| C(3)-N(2)-C(16)   | 123.10(11)  |
| C(4)-C(3)-N(2)    | 107.33(12)  |
| C(4)-C(3)-C(6)    | 110.62(12)  |
| N(2)-C(3)-C(6)    | 141.97(13)  |
| C(3)-C(4)-N(5)    | 107.49(11)  |
| C(3)-C(4)-C(14)   | 110.24(12)  |
| N(5)-C(4)-C(14)   | 142.20(13)  |
| C(4)-N(5)-C(1)    | 110.34(11)  |
| C(4)-N(5)-C(26)   | 126.1(7)    |
| C(1)-N(5)-C(26)   | 122.2(7)    |
| C(4)-N(5)-C(76)   | 124.6(11)   |
| C(1)-N(5)-C(76)   | 124.9(11)   |
| C(26)-N(5)-C(76)  | 7.9(9)      |
| C(7)-C(6)-C(15)   | 119.00(13)  |
| C(7)-C(6)-C(3)    | 137.99(14)  |
| C(15)-C(6)-C(3)   | 103.00(12)  |
| C(6)-C(7)-C(8)    | 118.24(15)  |
| C(6)-C(7)-H(7)    | 120.9       |
| C(8)-C(7)-H(7)    | 120.9       |
| C(9)-C(8)-C(7)    | 122.51(15)  |
| C(9)-C(8)-H(8)    | 118.7       |

|                   |            |
|-------------------|------------|
| C(7)-C(8)-H(8)    | 118.7      |
| C(8)-C(9)-C(10)   | 120.47(14) |
| C(8)-C(9)-H(9)    | 119.8      |
| C(10)-C(9)-H(9)   | 119.8      |
| C(15)-C(10)-C(9)  | 116.35(14) |
| C(15)-C(10)-C(11) | 115.92(15) |
| C(9)-C(10)-C(11)  | 127.73(14) |
| C(12)-C(11)-C(10) | 120.75(14) |
| C(12)-C(11)-H(11) | 119.6      |
| C(10)-C(11)-H(11) | 119.6      |
| C(11)-C(12)-C(13) | 122.62(15) |
| C(11)-C(12)-H(12) | 118.7      |
| C(13)-C(12)-H(12) | 118.7      |
| C(14)-C(13)-C(12) | 117.79(15) |
| C(14)-C(13)-H(13) | 121.1      |
| C(12)-C(13)-H(13) | 121.1      |
| C(13)-C(14)-C(15) | 119.27(13) |
| C(13)-C(14)-C(4)  | 137.53(14) |
| C(15)-C(14)-C(4)  | 103.20(12) |
| C(10)-C(15)-C(14) | 123.65(14) |
| C(10)-C(15)-C(6)  | 123.42(14) |
| C(14)-C(15)-C(6)  | 112.93(12) |
| C(17)-C(16)-C(21) | 123.10(12) |
| C(17)-C(16)-N(2)  | 118.20(12) |
| C(21)-C(16)-N(2)  | 118.70(12) |
| C(16)-C(17)-C(18) | 117.56(13) |
| C(16)-C(17)-C(22) | 120.43(12) |
| C(18)-C(17)-C(22) | 121.99(13) |
| C(19)-C(18)-C(17) | 121.29(14) |
| C(19)-C(18)-H(18) | 119.4      |
| C(17)-C(18)-H(18) | 119.4      |
| C(20)-C(19)-C(18) | 119.13(13) |
| C(20)-C(19)-C(23) | 120.52(15) |
| C(18)-C(19)-C(23) | 120.34(15) |
| C(19)-C(20)-C(21) | 121.57(14) |
| C(19)-C(20)-H(20) | 119.2      |
| C(21)-C(20)-H(20) | 119.2      |
| C(16)-C(21)-C(20) | 117.29(13) |
| C(16)-C(21)-C(24) | 121.10(12) |

|                     |            |
|---------------------|------------|
| C(20)-C(21)-C(24)   | 121.59(13) |
| C(17)-C(22)-H(22A)  | 109.5      |
| C(17)-C(22)-H(22B)  | 109.5      |
| H(22A)-C(22)-H(22B) | 109.5      |
| C(17)-C(22)-H(22C)  | 109.5      |
| H(22A)-C(22)-H(22C) | 109.5      |
| H(22B)-C(22)-H(22C) | 109.5      |
| C(19)-C(23)-H(23A)  | 109.5      |
| C(19)-C(23)-H(23B)  | 109.5      |
| H(23A)-C(23)-H(23B) | 109.5      |
| C(19)-C(23)-H(23C)  | 109.5      |
| H(23A)-C(23)-H(23C) | 109.5      |
| H(23B)-C(23)-H(23C) | 109.5      |
| C(21)-C(24)-H(24A)  | 109.5      |
| C(21)-C(24)-H(24B)  | 109.5      |
| H(24A)-C(24)-H(24B) | 109.5      |
| C(21)-C(24)-H(24C)  | 109.5      |
| H(24A)-C(24)-H(24C) | 109.5      |
| H(24B)-C(24)-H(24C) | 109.5      |
| C(31)-C(26)-C(27)   | 121.5(7)   |
| C(31)-C(26)-N(5)    | 120.7(6)   |
| C(27)-C(26)-N(5)    | 117.6(6)   |
| C(28)-C(27)-C(26)   | 117.2(6)   |
| C(28)-C(27)-C(32)   | 121.7(5)   |
| C(26)-C(27)-C(32)   | 121.0(6)   |
| C(29)-C(28)-C(27)   | 122.0(5)   |
| C(29)-C(28)-H(28)   | 119.0      |
| C(27)-C(28)-H(28)   | 119.0      |
| C(28)-C(29)-C(30)   | 118.6(5)   |
| C(28)-C(29)-C(33)   | 121.3(5)   |
| C(30)-C(29)-C(33)   | 120.1(5)   |
| C(29)-C(30)-C(31)   | 121.9(5)   |
| C(29)-C(30)-H(30)   | 119.0      |
| C(31)-C(30)-H(30)   | 119.0      |
| C(26)-C(31)-C(30)   | 117.5(6)   |
| C(26)-C(31)-C(34)   | 122.1(7)   |
| C(30)-C(31)-C(34)   | 120.3(7)   |
| C(81)-C(76)-C(77)   | 123.7(10)  |
| C(81)-C(76)-N(5)    | 120.3(9)   |

|                     |            |
|---------------------|------------|
| C(77)-C(76)-N(5)    | 116.0(9)   |
| C(78)-C(77)-C(76)   | 116.9(9)   |
| C(78)-C(77)-C(82)   | 122.2(10)  |
| C(76)-C(77)-C(82)   | 120.7(10)  |
| C(79)-C(78)-C(77)   | 121.6(8)   |
| C(79)-C(78)-H(78)   | 119.2      |
| C(77)-C(78)-H(78)   | 119.2      |
| C(78)-C(79)-C(80)   | 119.1(8)   |
| C(78)-C(79)-C(83)   | 120.4(9)   |
| C(80)-C(79)-C(83)   | 120.4(9)   |
| C(79)-C(80)-C(81)   | 123.1(9)   |
| C(79)-C(80)-H(80)   | 118.5      |
| C(81)-C(80)-H(80)   | 118.5      |
| C(76)-C(81)-C(80)   | 115.1(9)   |
| C(76)-C(81)-C(84)   | 122.8(10)  |
| C(80)-C(81)-C(84)   | 122.1(9)   |
| C(77)-C(82)-H(82A)  | 109.5      |
| C(77)-C(82)-H(82B)  | 109.5      |
| H(82A)-C(82)-H(82B) | 109.5      |
| C(77)-C(82)-H(82C)  | 109.5      |
| H(82A)-C(82)-H(82C) | 109.5      |
| H(82B)-C(82)-H(82C) | 109.5      |
| C(79)-C(83)-H(83A)  | 109.5      |
| C(79)-C(83)-H(83B)  | 109.5      |
| H(83A)-C(83)-H(83B) | 109.5      |
| C(79)-C(83)-H(83C)  | 109.5      |
| H(83A)-C(83)-H(83C) | 109.5      |
| H(83B)-C(83)-H(83C) | 109.5      |
| C(81)-C(84)-H(84A)  | 109.5      |
| C(81)-C(84)-H(84B)  | 109.5      |
| H(84A)-C(84)-H(84B) | 109.5      |
| C(81)-C(84)-H(84C)  | 109.5      |
| H(84A)-C(84)-H(84C) | 109.5      |
| H(84B)-C(84)-H(84C) | 109.5      |
| C(36)-C(35)-Ru(1)   | 118.33(10) |
| C(36)-C(35)-H(35)   | 120.8      |
| Ru(1)-C(35)-H(35)   | 120.8      |
| C(41)-C(36)-C(37)   | 118.63(12) |
| C(41)-C(36)-C(35)   | 118.17(12) |



|                     |            |
|---------------------|------------|
| C(37)-C(36)-C(35)   | 123.17(13) |
| C(38)-C(37)-C(36)   | 120.34(13) |
| C(38)-C(37)-H(37)   | 119.8      |
| C(36)-C(37)-H(37)   | 119.8      |
| C(37)-C(38)-C(39)   | 119.46(13) |
| C(37)-C(38)-H(38)   | 120.3      |
| C(39)-C(38)-H(38)   | 120.3      |
| C(38)-C(39)-C(40)   | 121.95(13) |
| C(38)-C(39)-H(39)   | 119.0      |
| C(40)-C(39)-H(39)   | 119.0      |
| C(41)-C(40)-C(39)   | 117.77(14) |
| C(41)-C(40)-H(40)   | 121.1      |
| C(39)-C(40)-H(40)   | 121.1      |
| O(42)-C(41)-C(40)   | 125.16(13) |
| O(42)-C(41)-C(36)   | 113.00(11) |
| C(40)-C(41)-C(36)   | 121.82(13) |
| C(41)-O(42)-C(43)   | 119.28(10) |
| C(41)-O(42)-Ru(1)   | 110.50(8)  |
| C(43)-O(42)-Ru(1)   | 129.37(8)  |
| O(42)-C(43)-C(44)   | 105.70(11) |
| O(42)-C(43)-C(45)   | 109.33(11) |
| C(44)-C(43)-C(45)   | 113.72(13) |
| O(42)-C(43)-H(43)   | 109.3      |
| C(44)-C(43)-H(43)   | 109.3      |
| C(45)-C(43)-H(43)   | 109.3      |
| C(43)-C(44)-H(44A)  | 109.5      |
| C(43)-C(44)-H(44B)  | 109.5      |
| H(44A)-C(44)-H(44B) | 109.5      |
| C(43)-C(44)-H(44C)  | 109.5      |
| H(44A)-C(44)-H(44C) | 109.5      |
| H(44B)-C(44)-H(44C) | 109.5      |
| C(43)-C(45)-H(45A)  | 109.5      |
| C(43)-C(45)-H(45B)  | 109.5      |
| H(45A)-C(45)-H(45B) | 109.5      |
| C(43)-C(45)-H(45C)  | 109.5      |
| H(45A)-C(45)-H(45C) | 109.5      |
| H(45B)-C(45)-H(45C) | 109.5      |
| Cl(51)-C(50)-Cl(52) | 109.8(4)   |
| Cl(51)-C(50)-H(50A) | 109.7      |

|                     |           |
|---------------------|-----------|
| Cl(52)-C(50)-H(50A) | 109.7     |
| Cl(51)-C(50)-H(50B) | 109.7     |
| Cl(52)-C(50)-H(50B) | 109.7     |
| H(50A)-C(50)-H(50B) | 108.2     |
| C(63)-O(60)-C(61)   | 122.7(6)  |
| C(62)-C(61)-O(60)   | 125.7(12) |
| C(62)-C(61)-H(61A)  | 105.9     |
| O(60)-C(61)-H(61A)  | 105.9     |
| C(62)-C(61)-H(61B)  | 105.9     |
| O(60)-C(61)-H(61B)  | 105.9     |
| H(61A)-C(61)-H(61B) | 106.2     |
| C(61)-C(62)-H(62A)  | 109.5     |
| C(61)-C(62)-H(62B)  | 109.5     |
| H(62A)-C(62)-H(62B) | 109.5     |
| C(61)-C(62)-H(62C)  | 109.5     |
| H(62A)-C(62)-H(62C) | 109.5     |
| H(62B)-C(62)-H(62C) | 109.5     |
| C(64)-C(63)-O(60)   | 135.9(12) |
| C(64)-C(63)-H(63A)  | 103.2     |
| O(60)-C(63)-H(63A)  | 103.2     |
| C(64)-C(63)-H(63B)  | 103.2     |
| O(60)-C(63)-H(63B)  | 103.2     |
| H(63A)-C(63)-H(63B) | 105.2     |
| C(63)-C(64)-H(64A)  | 109.5     |
| C(63)-C(64)-H(64B)  | 109.5     |
| H(64A)-C(64)-H(64B) | 109.5     |
| C(63)-C(64)-H(64C)  | 109.5     |
| H(64A)-C(64)-H(64C) | 109.5     |
| H(64B)-C(64)-H(64C) | 109.5     |

---

**Table S5.** Anisotropic displacement parameters ( $\text{\AA}^2 \times 10^3$ ) for **3**. The anisotropic displacement factor exponent takes the form:  $-2\pi^2 [ h^2 a^{*2} U^{11} + \dots + 2 h k a^* b^* U^{12} ]$

|       | U <sup>11</sup> | U <sup>22</sup> | U <sup>33</sup> | U <sup>23</sup> | U <sup>13</sup> | U <sup>12</sup> |
|-------|-----------------|-----------------|-----------------|-----------------|-----------------|-----------------|
| Ru(1) | 9(1)            | 12(1)           | 12(1)           | 1(1)            | 2(1)            | 1(1)            |
| Cl(2) | 17(1)           | 18(1)           | 19(1)           | -3(1)           | 3(1)            | 3(1)            |
| Cl(3) | 15(1)           | 20(1)           | 16(1)           | -2(1)           | 5(1)            | 1(1)            |
| C(1)  | 11(1)           | 14(1)           | 13(1)           | 0(1)            | 3(1)            | 2(1)            |
| N(2)  | 10(1)           | 13(1)           | 16(1)           | 1(1)            | 2(1)            | 1(1)            |
| C(3)  | 10(1)           | 15(1)           | 20(1)           | 0(1)            | 3(1)            | 0(1)            |
| C(4)  | 10(1)           | 16(1)           | 19(1)           | 0(1)            | 3(1)            | 0(1)            |
| N(5)  | 10(1)           | 15(1)           | 16(1)           | 2(1)            | 2(1)            | 1(1)            |
| C(6)  | 12(1)           | 16(1)           | 23(1)           | -2(1)           | 5(1)            | -1(1)           |
| C(7)  | 17(1)           | 18(1)           | 32(1)           | 0(1)            | 6(1)            | -1(1)           |
| C(8)  | 22(1)           | 20(1)           | 45(1)           | 0(1)            | 12(1)           | -7(1)           |
| C(9)  | 16(1)           | 27(1)           | 43(1)           | -4(1)           | 8(1)            | -7(1)           |
| C(10) | 13(1)           | 26(1)           | 32(1)           | -4(1)           | 5(1)            | -3(1)           |
| C(11) | 11(1)           | 37(1)           | 37(1)           | -2(1)           | -1(1)           | -3(1)           |
| C(12) | 12(1)           | 40(1)           | 34(1)           | 5(1)            | -4(1)           | 2(1)            |
| C(13) | 14(1)           | 29(1)           | 26(1)           | 4(1)            | 1(1)            | 1(1)            |
| C(14) | 10(1)           | 21(1)           | 21(1)           | -1(1)           | 3(1)            | 0(1)            |
| C(15) | 12(1)           | 19(1)           | 23(1)           | -2(1)           | 4(1)            | -1(1)           |
| C(16) | 10(1)           | 12(1)           | 17(1)           | 2(1)            | 2(1)            | 0(1)            |
| C(17) | 13(1)           | 14(1)           | 19(1)           | 1(1)            | 5(1)            | -2(1)           |
| C(18) | 18(1)           | 22(1)           | 18(1)           | 5(1)            | 4(1)            | -1(1)           |
| C(19) | 19(1)           | 19(1)           | 26(1)           | 10(1)           | 5(1)            | 3(1)            |
| C(20) | 19(1)           | 14(1)           | 29(1)           | 4(1)            | 8(1)            | 4(1)            |
| C(21) | 13(1)           | 13(1)           | 21(1)           | 0(1)            | 5(1)            | -1(1)           |
| C(22) | 21(1)           | 21(1)           | 20(1)           | -3(1)           | 7(1)            | 1(1)            |
| C(23) | 35(1)           | 34(1)           | 36(1)           | 18(1)           | 6(1)            | 14(1)           |
| C(24) | 22(1)           | 19(1)           | 23(1)           | -4(1)           | 6(1)            | 2(1)            |
| C(26) | 7(3)            | 12(2)           | 21(2)           | 3(2)            | -1(2)           | 1(2)            |
| C(27) | 8(1)            | 23(2)           | 14(2)           | 7(2)            | 1(1)            | 2(2)            |
| C(28) | 11(1)           | 37(3)           | 21(2)           | 9(2)            | 2(1)            | 0(2)            |
| C(29) | 13(2)           | 31(3)           | 29(3)           | 14(2)           | -2(1)           | -6(2)           |
| C(30) | 23(2)           | 19(2)           | 33(4)           | 7(2)            | -4(2)           | -4(2)           |
| C(31) | 12(2)           | 26(2)           | 22(2)           | -1(2)           | 1(2)            | 1(1)            |
| C(32) | 18(2)           | 26(2)           | 19(2)           | -6(2)           | 4(1)            | 0(2)            |

|        |         |        |        |        |        |        |
|--------|---------|--------|--------|--------|--------|--------|
| C(33)  | 26(2)   | 48(3)  | 49(3)  | 26(2)  | -2(2)  | -16(2) |
| C(34)  | 26(2)   | 23(2)  | 29(3)  | -1(2)  | 2(2)   | 9(2)   |
| C(76)  | 9(3)    | 23(5)  | 21(4)  | 15(3)  | 4(3)   | 3(4)   |
| C(77)  | 11(3)   | 30(5)  | 33(4)  | 3(3)   | -1(2)  | 0(4)   |
| C(78)  | 21(4)   | 58(6)  | 21(3)  | 21(4)  | -3(2)  | -13(5) |
| C(79)  | 44(6)   | 36(5)  | 29(5)  | 17(4)  | -14(3) | -25(4) |
| C(80)  | 42(7)   | 22(4)  | 31(5)  | 10(3)  | -18(3) | -13(3) |
| C(81)  | 16(4)   | 5(3)   | 29(5)  | 9(2)   | -4(3)  | -2(2)  |
| C(82)  | 18(3)   | 50(6)  | 22(3)  | 4(5)   | 1(2)   | 5(5)   |
| C(83)  | 116(11) | 65(7)  | 44(5)  | 34(5)  | -18(6) | -61(7) |
| C(84)  | 26(3)   | 21(4)  | 42(7)  | -6(4)  | 4(4)   | 9(3)   |
| C(35)  | 11(1)   | 14(1)  | 15(1)  | 1(1)   | 4(1)   | 1(1)   |
| C(36)  | 11(1)   | 14(1)  | 13(1)  | -1(1)  | 3(1)   | 2(1)   |
| C(37)  | 16(1)   | 17(1)  | 14(1)  | 1(1)   | 4(1)   | 4(1)   |
| C(38)  | 17(1)   | 23(1)  | 15(1)  | -3(1)  | -1(1)  | 6(1)   |
| C(39)  | 13(1)   | 25(1)  | 21(1)  | -6(1)  | 0(1)   | 0(1)   |
| C(40)  | 13(1)   | 19(1)  | 21(1)  | -2(1)  | 3(1)   | -2(1)  |
| C(41)  | 11(1)   | 16(1)  | 14(1)  | 0(1)   | 2(1)   | 1(1)   |
| O(42)  | 10(1)   | 17(1)  | 16(1)  | 5(1)   | 1(1)   | -2(1)  |
| C(43)  | 16(1)   | 16(1)  | 22(1)  | 5(1)   | 6(1)   | -3(1)  |
| C(44)  | 20(1)   | 21(1)  | 25(1)  | 9(1)   | 7(1)   | 3(1)   |
| C(45)  | 19(1)   | 28(1)  | 25(1)  | 7(1)   | 10(1)  | 0(1)   |
| C(50)  | 65(5)   | 37(4)  | 69(5)  | -11(3) | 52(4)  | -21(3) |
| Cl(51) | 43(1)   | 29(1)  | 46(1)  | -6(1)  | 7(1)   | 4(1)   |
| Cl(52) | 63(1)   | 59(1)  | 53(1)  | -20(1) | 19(1)  | -7(1)  |
| O(60)  | 75(3)   | 77(3)  | 77(3)  | 40(2)  | 11(2)  | -6(2)  |
| C(61)  | 57(4)   | 107(5) | 52(4)  | 30(3)  | -3(3)  | 2(3)   |
| C(62)  | 94(11)  | 59(6)  | 116(9) | 43(5)  | -7(9)  | 11(7)  |
| C(63)  | 53(4)   | 82(4)  | 79(5)  | 37(3)  | 13(4)  | -18(3) |
| C(64)  | 66(8)   | 89(8)  | 86(9)  | 32(5)  | 10(8)  | -6(6)  |

---

**Table S6.** Hydrogen coordinates ( $\times 10^4$ ) and isotropic displacement parameters ( $\text{\AA}^2 \times 10^3$ ) for **3**.

|        | x    | y     | z    | U(eq) |
|--------|------|-------|------|-------|
| H(7)   | 3671 | 4715  | 2025 | 27    |
| H(8)   | 4768 | 5645  | 2405 | 34    |
| H(9)   | 5670 | 4628  | 3235 | 35    |
| H(11)  | 6100 | 2598  | 4134 | 36    |
| H(12)  | 5822 | 695   | 4593 | 37    |
| H(13)  | 4701 | -136  | 4208 | 29    |
| H(18)  | 1702 | 3510  | -6   | 23    |
| H(20)  | 1392 | 5599  | 1682 | 25    |
| H(22A) | 3025 | 1707  | 1010 | 31    |
| H(22B) | 2438 | 1688  | 228  | 31    |
| H(22C) | 2360 | 856   | 916  | 31    |
| H(23A) | 697  | 5998  | 406  | 54    |
| H(23B) | 790  | 5132  | -262 | 54    |
| H(23C) | 1309 | 6281  | 72   | 54    |
| H(24A) | 1926 | 5054  | 2955 | 32    |
| H(24B) | 2574 | 4128  | 3140 | 32    |
| H(24C) | 1839 | 3532  | 3038 | 32    |
| H(28)  | 2675 | -1071 | 5105 | 28    |
| H(30)  | 3109 | -3690 | 3741 | 33    |
| H(32A) | 2929 | 1143  | 5002 | 32    |
| H(32B) | 2566 | 1612  | 4166 | 32    |
| H(32C) | 3373 | 1494  | 4463 | 32    |
| H(33A) | 2598 | -3281 | 5381 | 66    |
| H(33B) | 3011 | -4272 | 5029 | 66    |
| H(33C) | 2223 | -4031 | 4625 | 66    |
| H(34A) | 3350 | -1442 | 2397 | 41    |
| H(34B) | 3177 | -2931 | 2471 | 41    |
| H(34C) | 3898 | -2369 | 2942 | 41    |
| H(78)  | 2743 | -1589 | 5031 | 42    |
| H(80)  | 3199 | -3827 | 3521 | 46    |
| H(82A) | 3346 | 1174  | 4568 | 46    |
| H(82B) | 2814 | 699   | 4978 | 46    |
| H(82C) | 2551 | 1276  | 4151 | 46    |

|        |       |       |      |     |
|--------|-------|-------|------|-----|
| H(83A) | 2795  | -3805 | 5234 | 126 |
| H(83B) | 3225  | -4633 | 4817 | 126 |
| H(83C) | 2422  | -4519 | 4464 | 126 |
| H(84A) | 3186  | -1504 | 2183 | 47  |
| H(84B) | 3389  | -2970 | 2411 | 47  |
| H(84C) | 3926  | -1838 | 2721 | 47  |
| H(35)  | 1235  | 1865  | 1412 | 16  |
| H(37)  | 102   | 2070  | 368  | 19  |
| H(38)  | -986  | 1284  | -213 | 23  |
| H(39)  | -1369 | -545  | 260  | 25  |
| H(40)  | -693  | -1594 | 1332 | 22  |
| H(43)  | 74    | -2524 | 2231 | 21  |
| H(44A) | 1261  | -2768 | 2795 | 33  |
| H(44B) | 857   | -3106 | 3377 | 33  |
| H(44C) | 1234  | -1746 | 3424 | 33  |
| H(45A) | 167   | -491  | 3292 | 35  |
| H(45B) | -270  | -1779 | 3246 | 35  |
| H(45C) | -482  | -739  | 2587 | 35  |
| H(50A) | 5096  | 950   | 714  | 60  |
| H(50B) | 4996  | 2150  | 151  | 60  |
| H(61A) | 5478  | 708   | 985  | 91  |
| H(61B) | 5591  | 1504  | 312  | 91  |
| H(62A) | 4451  | 1982  | 216  | 147 |
| H(62B) | 5118  | 2791  | 622  | 147 |
| H(62C) | 4804  | 1822  | 1094 | 147 |
| H(63A) | 5831  | -469  | -153 | 87  |
| H(63B) | 5584  | -1409 | 370  | 87  |
| H(64A) | 5530  | -2679 | -314 | 124 |
| H(64B) | 5678  | -1678 | -896 | 124 |
| H(64C) | 4916  | -1946 | -898 | 124 |

---

**Table S7.** Torsion angles [°] for **3**.

---

|                       |             |
|-----------------------|-------------|
| C(35)-Ru(1)-C(1)-N(2) | 8.25(14)    |
| O(42)-Ru(1)-C(1)-N(2) | 126.8(11)   |
| Cl(2)-Ru(1)-C(1)-N(2) | 107.99(13)  |
| Cl(3)-Ru(1)-C(1)-N(2) | -92.56(13)  |
| C(35)-Ru(1)-C(1)-N(5) | -171.20(11) |
| O(42)-Ru(1)-C(1)-N(5) | -52.7(12)   |
| Cl(2)-Ru(1)-C(1)-N(5) | -71.46(10)  |
| Cl(3)-Ru(1)-C(1)-N(5) | 88.00(10)   |
| N(5)-C(1)-N(2)-C(3)   | -0.33(15)   |
| Ru(1)-C(1)-N(2)-C(3)  | -179.85(11) |
| N(5)-C(1)-N(2)-C(16)  | 179.68(12)  |
| Ru(1)-C(1)-N(2)-C(16) | 0.2(2)      |
| C(1)-N(2)-C(3)-C(4)   | 0.19(16)    |
| C(16)-N(2)-C(3)-C(4)  | -179.82(12) |
| C(1)-N(2)-C(3)-C(6)   | -176.04(18) |
| C(16)-N(2)-C(3)-C(6)  | 3.9(3)      |
| N(2)-C(3)-C(4)-N(5)   | 0.04(16)    |
| C(6)-C(3)-C(4)-N(5)   | 177.56(12)  |
| N(2)-C(3)-C(4)-C(14)  | -177.61(12) |
| C(6)-C(3)-C(4)-C(14)  | -0.09(17)   |
| C(3)-C(4)-N(5)-C(1)   | -0.25(16)   |
| C(14)-C(4)-N(5)-C(1)  | 176.14(18)  |
| C(3)-C(4)-N(5)-C(26)  | -166.8(4)   |
| C(14)-C(4)-N(5)-C(26) | 9.5(5)      |
| C(3)-C(4)-N(5)-C(76)  | -176.3(7)   |
| C(14)-C(4)-N(5)-C(76) | 0.1(7)      |
| N(2)-C(1)-N(5)-C(4)   | 0.36(15)    |
| Ru(1)-C(1)-N(5)-C(4)  | 179.95(10)  |
| N(2)-C(1)-N(5)-C(26)  | 167.6(4)    |
| Ru(1)-C(1)-N(5)-C(26) | -12.8(4)    |
| N(2)-C(1)-N(5)-C(76)  | 176.4(7)    |
| Ru(1)-C(1)-N(5)-C(76) | -4.0(7)     |
| C(4)-C(3)-C(6)-C(7)   | -178.67(18) |
| N(2)-C(3)-C(6)-C(7)   | -2.5(3)     |
| C(4)-C(3)-C(6)-C(15)  | 0.30(16)    |
| N(2)-C(3)-C(6)-C(15)  | 176.46(18)  |
| C(15)-C(6)-C(7)-C(8)  | 0.0(2)      |

|                         |             |
|-------------------------|-------------|
| C(3)-C(6)-C(7)-C(8)     | 178.90(17)  |
| C(6)-C(7)-C(8)-C(9)     | 1.0(3)      |
| C(7)-C(8)-C(9)-C(10)    | -1.2(3)     |
| C(8)-C(9)-C(10)-C(15)   | 0.3(3)      |
| C(8)-C(9)-C(10)-C(11)   | -178.78(18) |
| C(15)-C(10)-C(11)-C(12) | -0.4(3)     |
| C(9)-C(10)-C(11)-C(12)  | 178.71(18)  |
| C(10)-C(11)-C(12)-C(13) | 0.1(3)      |
| C(11)-C(12)-C(13)-C(14) | 0.4(3)      |
| C(12)-C(13)-C(14)-C(15) | -0.5(2)     |
| C(12)-C(13)-C(14)-C(4)  | 179.60(17)  |
| C(3)-C(4)-C(14)-C(13)   | 179.71(18)  |
| N(5)-C(4)-C(14)-C(13)   | 3.4(4)      |
| C(3)-C(4)-C(14)-C(15)   | -0.16(16)   |
| N(5)-C(4)-C(14)-C(15)   | -176.50(19) |
| C(9)-C(10)-C(15)-C(14)  | -178.95(15) |
| C(11)-C(10)-C(15)-C(14) | 0.2(2)      |
| C(9)-C(10)-C(15)-C(6)   | 0.8(2)      |
| C(11)-C(10)-C(15)-C(6)  | 179.97(15)  |
| C(13)-C(14)-C(15)-C(10) | 0.2(2)      |
| C(4)-C(14)-C(15)-C(10)  | -179.87(15) |
| C(13)-C(14)-C(15)-C(6)  | -179.53(14) |
| C(4)-C(14)-C(15)-C(6)   | 0.37(17)    |
| C(7)-C(6)-C(15)-C(10)   | -1.0(2)     |
| C(3)-C(6)-C(15)-C(10)   | 179.82(14)  |
| C(7)-C(6)-C(15)-C(14)   | 178.80(14)  |
| C(3)-C(6)-C(15)-C(14)   | -0.42(17)   |
| C(1)-N(2)-C(16)-C(17)   | -89.04(16)  |
| C(3)-N(2)-C(16)-C(17)   | 90.98(16)   |
| C(1)-N(2)-C(16)-C(21)   | 90.54(16)   |
| C(3)-N(2)-C(16)-C(21)   | -89.45(16)  |
| C(21)-C(16)-C(17)-C(18) | -2.5(2)     |
| N(2)-C(16)-C(17)-C(18)  | 177.06(12)  |
| C(21)-C(16)-C(17)-C(22) | 179.37(13)  |
| N(2)-C(16)-C(17)-C(22)  | -1.07(19)   |
| C(16)-C(17)-C(18)-C(19) | 1.9(2)      |
| C(22)-C(17)-C(18)-C(19) | 179.99(14)  |
| C(17)-C(18)-C(19)-C(20) | 0.2(2)      |
| C(17)-C(18)-C(19)-C(23) | 179.10(15)  |



|                         |             |
|-------------------------|-------------|
| C(18)-C(19)-C(20)-C(21) | -1.8(2)     |
| C(23)-C(19)-C(20)-C(21) | 179.27(15)  |
| C(17)-C(16)-C(21)-C(20) | 1.0(2)      |
| N(2)-C(16)-C(21)-C(20)  | -178.60(12) |
| C(17)-C(16)-C(21)-C(24) | 179.18(13)  |
| N(2)-C(16)-C(21)-C(24)  | -0.37(19)   |
| C(19)-C(20)-C(21)-C(16) | 1.3(2)      |
| C(19)-C(20)-C(21)-C(24) | -176.97(14) |
| C(4)-N(5)-C(26)-C(31)   | -94.4(14)   |
| C(1)-N(5)-C(26)-C(31)   | 100.4(14)   |
| C(76)-N(5)-C(26)-C(31)  | -12(12)     |
| C(4)-N(5)-C(26)-C(27)   | 81.1(14)    |
| C(1)-N(5)-C(26)-C(27)   | -84.0(13)   |
| C(76)-N(5)-C(26)-C(27)  | 163(14)     |
| C(31)-C(26)-C(27)-C(28) | -12(2)      |
| N(5)-C(26)-C(27)-C(28)  | 172.1(10)   |
| C(31)-C(26)-C(27)-C(32) | 164.0(13)   |
| N(5)-C(26)-C(27)-C(32)  | -11.5(19)   |
| C(26)-C(27)-C(28)-C(29) | 4.6(15)     |
| C(32)-C(27)-C(28)-C(29) | -171.8(8)   |
| C(27)-C(28)-C(29)-C(30) | 4.8(12)     |
| C(27)-C(28)-C(29)-C(33) | -175.6(8)   |
| C(28)-C(29)-C(30)-C(31) | -7.0(14)    |
| C(33)-C(29)-C(30)-C(31) | 173.5(9)    |
| C(27)-C(26)-C(31)-C(30) | 10(2)       |
| N(5)-C(26)-C(31)-C(30)  | -174.2(12)  |
| C(27)-C(26)-C(31)-C(34) | -165.1(13)  |
| N(5)-C(26)-C(31)-C(34)  | 10(2)       |
| C(29)-C(30)-C(31)-C(26) | -0.5(18)    |
| C(29)-C(30)-C(31)-C(34) | 175.1(10)   |
| C(4)-N(5)-C(76)-C(81)   | -89(2)      |
| C(1)-N(5)-C(76)-C(81)   | 95(2)       |
| C(26)-N(5)-C(76)-C(81)  | 167(15)     |
| C(4)-N(5)-C(76)-C(77)   | 91(2)       |
| C(1)-N(5)-C(76)-C(77)   | -85(2)      |
| C(26)-N(5)-C(76)-C(77)  | -13(11)     |
| C(81)-C(76)-C(77)-C(78) | -7(4)       |
| N(5)-C(76)-C(77)-C(78)  | 172.9(17)   |
| C(81)-C(76)-C(77)-C(82) | 167(2)      |

|                         |             |
|-------------------------|-------------|
| N(5)-C(76)-C(77)-C(82)  | -13(3)      |
| C(76)-C(77)-C(78)-C(79) | 1(3)        |
| C(82)-C(77)-C(78)-C(79) | -173.1(14)  |
| C(77)-C(78)-C(79)-C(80) | 4(2)        |
| C(77)-C(78)-C(79)-C(83) | -178.7(14)  |
| C(78)-C(79)-C(80)-C(81) | -4(2)       |
| C(83)-C(79)-C(80)-C(81) | 178.6(14)   |
| C(77)-C(76)-C(81)-C(80) | 7(3)        |
| N(5)-C(76)-C(81)-C(80)  | -173.0(18)  |
| C(77)-C(76)-C(81)-C(84) | -170(2)     |
| N(5)-C(76)-C(81)-C(84)  | 10(3)       |
| C(79)-C(80)-C(81)-C(76) | -1(3)       |
| C(79)-C(80)-C(81)-C(84) | 176.1(17)   |
| C(1)-Ru(1)-C(35)-C(36)  | 173.82(10)  |
| O(42)-Ru(1)-C(35)-C(36) | -4.14(10)   |
| Cl(2)-Ru(1)-C(35)-C(36) | 79.67(10)   |
| Cl(3)-Ru(1)-C(35)-C(36) | -90.18(10)  |
| Ru(1)-C(35)-C(36)-C(41) | 3.10(17)    |
| Ru(1)-C(35)-C(36)-C(37) | -175.08(10) |
| C(41)-C(36)-C(37)-C(38) | -0.8(2)     |
| C(35)-C(36)-C(37)-C(38) | 177.36(13)  |
| C(36)-C(37)-C(38)-C(39) | -0.1(2)     |
| C(37)-C(38)-C(39)-C(40) | 0.9(2)      |
| C(38)-C(39)-C(40)-C(41) | -0.6(2)     |
| C(39)-C(40)-C(41)-O(42) | -178.94(13) |
| C(39)-C(40)-C(41)-C(36) | -0.4(2)     |
| C(37)-C(36)-C(41)-O(42) | 179.80(12)  |
| C(35)-C(36)-C(41)-O(42) | 1.54(18)    |
| C(37)-C(36)-C(41)-C(40) | 1.1(2)      |
| C(35)-C(36)-C(41)-C(40) | -177.18(13) |
| C(40)-C(41)-O(42)-C(43) | -15.4(2)    |
| C(36)-C(41)-O(42)-C(43) | 165.97(12)  |
| C(40)-C(41)-O(42)-Ru(1) | 174.21(12)  |
| C(36)-C(41)-O(42)-Ru(1) | -4.45(14)   |
| C(35)-Ru(1)-O(42)-C(41) | 4.88(9)     |
| C(1)-Ru(1)-O(42)-C(41)  | -114.0(11)  |
| Cl(2)-Ru(1)-O(42)-C(41) | -95.20(8)   |
| Cl(3)-Ru(1)-O(42)-C(41) | 105.23(8)   |
| C(35)-Ru(1)-O(42)-C(43) | -164.29(12) |

|                         |            |
|-------------------------|------------|
| C(1)-Ru(1)-O(42)-C(43)  | 76.8(12)   |
| Cl(2)-Ru(1)-O(42)-C(43) | 95.63(11)  |
| Cl(3)-Ru(1)-O(42)-C(43) | -63.95(11) |
| C(41)-O(42)-C(43)-C(44) | 168.28(12) |
| Ru(1)-O(42)-C(43)-C(44) | -23.36(16) |
| C(41)-O(42)-C(43)-C(45) | -68.94(15) |
| Ru(1)-O(42)-C(43)-C(45) | 99.42(12)  |
| C(63)-O(60)-C(61)-C(62) | 179.3(18)  |
| C(61)-O(60)-C(63)-C(64) | -166(2)    |

---

**Figure S2.** ORTEP plot for 1,3-(2,6-dimethylphenyl)-4,5-imidazolin-2-ylidene ruthenium isopropoxybenzylidene dichloride **4**

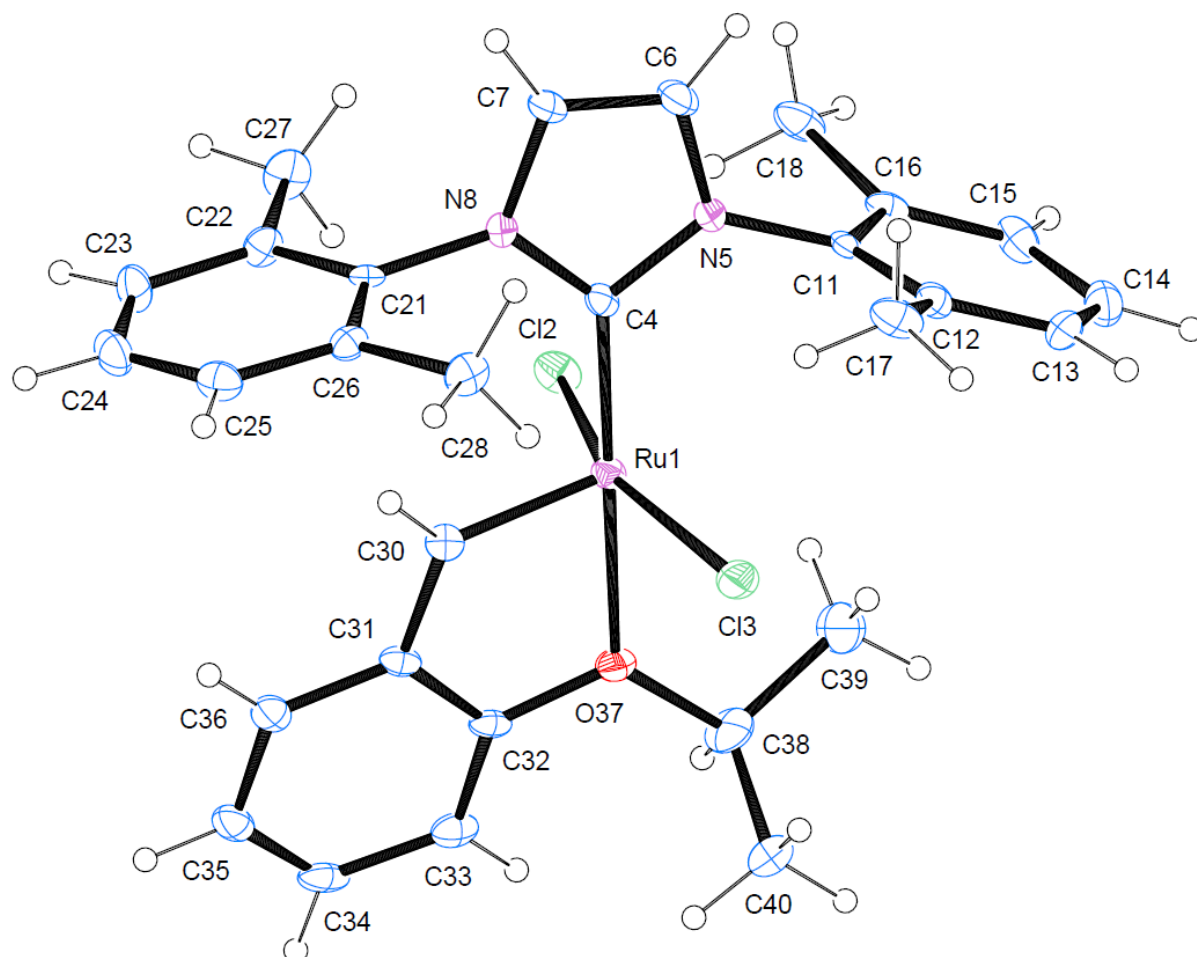

**Table S8.** Crystal data and structure refinement for **4**.

|                                   |                                                                               |                 |
|-----------------------------------|-------------------------------------------------------------------------------|-----------------|
| Identification code               | cc06evy1n                                                                     |                 |
| Empirical formula                 | 3(C <sub>29</sub> H <sub>32</sub> Cl <sub>2</sub> N <sub>2</sub> ORu), 1/4(O) |                 |
| Formula weight                    | 1790.66                                                                       |                 |
| Temperature                       | 100(2) K                                                                      |                 |
| Wavelength                        | 0.71073 Å                                                                     |                 |
| Crystal system                    | Triclinic                                                                     |                 |
| Space group                       | <i>P</i> -1                                                                   |                 |
| Unit cell dimensions              | a = 17.0768(6) Å                                                              | α = 108.116(3)° |
|                                   | b = 17.4168(6) Å                                                              | β = 97.210(3)°  |
|                                   | c = 17.9705(6) Å                                                              | γ = 119.219(2)° |
| Volume                            | 4178.5(2) Å <sup>3</sup>                                                      |                 |
| Z                                 | 2                                                                             |                 |
| Density (calculated)              | 1.429 Mg/m <sup>3</sup>                                                       |                 |
| Absorption coefficient            | 0.779 mm <sup>-1</sup>                                                        |                 |
| F(000)                            | 1840                                                                          |                 |
| Crystal size                      | 0.27 x 0.07 x 0.02 mm <sup>3</sup>                                            |                 |
| Theta range for data collection   | 1.38 to 27.48°                                                                |                 |
| Index ranges                      | -22 ≤ h ≤ 21, -22 ≤ k ≤ 21, 0 ≤ l ≤ 23                                        |                 |
| Reflections collected             | 105659                                                                        |                 |
| Independent reflections           | 19099 [R(int) = 0.1310]                                                       |                 |
| Completeness to theta = 27.48°    | 99.6 %                                                                        |                 |
| Absorption correction             | Semi-empirical from equivalents                                               |                 |
| Max. and min. transmission        | 0.9281 and 0.8243                                                             |                 |
| Refinement method                 | Full-matrix least-squares on F <sup>2</sup>                                   |                 |
| Data / restraints / parameters    | 19099 / 360 / 1043                                                            |                 |
| Goodness-of-fit on F <sup>2</sup> | 1.024                                                                         |                 |
| Final R indices [I > 2σ(I)]       | R1 = 0.0579, wR2 = 0.0919                                                     |                 |
| R indices (all data)              | R1 = 0.1415, wR2 = 0.1169                                                     |                 |
| Largest diff. peak and hole       | 1.161 and -0.767 e.Å <sup>-3</sup>                                            |                 |

**Table S9.** Atomic coordinates ( $\times 10^4$ ) and equivalent isotropic displacement parameters ( $\text{\AA}^2 \times 10^3$ ) for **4**.  $U(\text{eq})$  is defined as one third of the trace of the orthogonalized  $U_{ij}$  tensor.

|       | x        | y       | z       | U(eq) |
|-------|----------|---------|---------|-------|
| Ru(1) | 976(1)   | 3222(1) | 6064(1) | 20(1) |
| Cl(2) | 701(1)   | 2118(1) | 6639(1) | 30(1) |
| Cl(3) | 1405(1)  | 3961(1) | 5171(1) | 32(1) |
| C(4)  | -401(3)  | 2633(3) | 5563(3) | 20(1) |
| N(5)  | -954(3)  | 1846(3) | 4799(2) | 22(1) |
| C(6)  | -1896(4) | 1545(3) | 4610(3) | 29(1) |
| C(7)  | -1962(4) | 2123(3) | 5256(3) | 32(1) |
| N(8)  | -1049(3) | 2786(3) | 5836(2) | 21(1) |
| C(11) | -608(3)  | 1432(3) | 4212(3) | 19(1) |
| C(12) | -389(4)  | 1776(3) | 3618(3) | 24(1) |
| C(13) | -44(4)   | 1374(4) | 3061(3) | 31(1) |
| C(14) | 59(4)    | 656(4)  | 3099(3) | 34(2) |
| C(15) | -223(4)  | 272(4)  | 3657(3) | 32(1) |
| C(16) | -579(3)  | 647(3)  | 4218(3) | 24(1) |
| C(17) | -586(4)  | 2494(3) | 3514(3) | 34(1) |
| C(18) | -1011(4) | 156(3)  | 4747(3) | 35(2) |
| C(21) | -857(3)  | 3582(3) | 6579(3) | 21(1) |
| C(22) | -920(4)  | 3454(3) | 7292(3) | 26(1) |
| C(23) | -768(4)  | 4226(4) | 7979(3) | 32(1) |
| C(24) | -591(4)  | 5063(4) | 7928(3) | 34(2) |
| C(25) | -535(4)  | 5176(4) | 7202(3) | 30(1) |
| C(26) | -667(3)  | 4429(3) | 6513(3) | 22(1) |
| C(27) | -1123(4) | 2527(4) | 7338(3) | 35(2) |
| C(28) | -594(4)  | 4535(4) | 5719(3) | 30(1) |
| C(30) | 1293(3)  | 4269(3) | 6984(3) | 21(1) |
| C(31) | 2226(3)  | 4813(3) | 7606(3) | 21(1) |
| C(32) | 2871(3)  | 4565(3) | 7434(3) | 22(1) |
| C(33) | 3737(4)  | 4990(4) | 8001(3) | 28(1) |
| C(34) | 3980(4)  | 5712(4) | 8771(3) | 32(1) |
| C(35) | 3391(4)  | 6008(3) | 8960(3) | 30(1) |
| C(36) | 2503(4)  | 5557(3) | 8376(3) | 26(1) |
| O(37) | 2519(2)  | 3841(2) | 6642(2) | 28(1) |
| C(38) | 3145(4)  | 3613(4) | 6293(4) | 41(2) |
| C(39) | 2518(4)  | 2658(4) | 5525(4) | 59(2) |

|                     |          |          |          |       |
|---------------------|----------|----------|----------|-------|
| C(40)               | 3846(4)  | 4443(4)  | 6109(4)  | 50(2) |
| Ru(41)              | 2305(1)  | 3476(1)  | 1370(1)  | 19(1) |
| Cl(42)              | 660(1)   | 2653(1)  | 1045(1)  | 28(1) |
| Cl(43)              | 3803(1)  | 3726(1)  | 1726(1)  | 34(1) |
| C(44)               | 2256(3)  | 3342(3)  | 221(3)   | 20(1) |
| N(45)               | 2004(3)  | 2505(3)  | -440(2)  | 18(1) |
| C(46)               | 1969(4)  | 2611(3)  | -1170(3) | 26(1) |
| C(47)               | 2220(4)  | 3525(3)  | -989(3)  | 26(1) |
| N(48)               | 2387(3)  | 3956(3)  | -147(2)  | 22(1) |
| C(51)               | 1817(4)  | 1611(3)  | -418(3)  | 20(1) |
| C(52)               | 2574(4)  | 1507(3)  | -265(3)  | 22(1) |
| C(53)               | 2369(4)  | 621(3)   | -289(3)  | 26(1) |
| C(54)               | 1449(4)  | -130(4)  | -475(3)  | 29(1) |
| C(55)               | 706(4)   | -27(3)   | -655(3)  | 28(1) |
| C(56)               | 869(4)   | 838(3)   | -643(3)  | 21(1) |
| C(57)               | 3574(3)  | 2285(3)  | -144(3)  | 32(1) |
| C(58)               | 53(3)    | 919(3)   | -917(3)  | 30(1) |
| C(61A) <sup>a</sup> | 2813(7)  | 4991(6)  | 286(8)   | 26(2) |
| C(62A) <sup>a</sup> | 2204(8)  | 5300(6)  | 304(6)   | 33(2) |
| C(63A) <sup>a</sup> | 2611(9)  | 6302(6)  | 742(8)   | 45(2) |
| C(64A) <sup>a</sup> | 3602(9)  | 6937(7)  | 1134(8)  | 49(2) |
| C(65A) <sup>a</sup> | 4179(8)  | 6604(6)  | 1099(5)  | 48(2) |
| C(66A) <sup>a</sup> | 3821(8)  | 5614(7)  | 667(7)   | 34(2) |
| C(67A) <sup>a</sup> | 1154(7)  | 4578(8)  | -114(7)  | 43(3) |
| C(68A) <sup>a</sup> | 4437(6)  | 5246(6)  | 599(5)   | 38(2) |
| C(61B) <sup>b</sup> | 2441(12) | 4895(12) | 201(17)  | 35(3) |
| C(62B) <sup>b</sup> | 1627(15) | 4898(12) | 61(14)   | 37(3) |
| C(63B) <sup>b</sup> | 1766(13) | 5812(10) | 366(10)  | 40(3) |
| C(64B) <sup>b</sup> | 2690(14) | 6644(11) | 840(15)  | 45(3) |
| C(65B) <sup>b</sup> | 3451(17) | 6596(12) | 977(16)  | 49(3) |
| C(66B) <sup>b</sup> | 3378(13) | 5709(10) | 627(11)  | 40(3) |
| C(67B) <sup>b</sup> | 670(12)  | 3963(12) | -425(10) | 35(4) |
| C(68B) <sup>b</sup> | 4210(13) | 5664(17) | 801(16)  | 47(5) |
| C(70)               | 2631(4)  | 4723(3)  | 1876(3)  | 30(1) |
| C(71)               | 2747(4)  | 5144(3)  | 2740(3)  | 25(1) |
| C(72)               | 2579(4)  | 4565(3)  | 3159(3)  | 23(1) |
| C(73)               | 2640(3)  | 4915(4)  | 3993(3)  | 26(1) |
| C(74)               | 2894(4)  | 5865(4)  | 4390(3)  | 30(1) |
| C(75)               | 3096(4)  | 6463(4)  | 3992(3)  | 31(1) |

|        |         |          |         |       |
|--------|---------|----------|---------|-------|
| C(76)  | 3001(4) | 6095(3)  | 3164(3) | 30(1) |
| O(77)  | 2357(2) | 3653(2)  | 2688(2) | 22(1) |
| C(78)  | 2358(4) | 3043(3)  | 3086(3) | 24(1) |
| C(79)  | 1976(4) | 2066(3)  | 2390(3) | 31(1) |
| C(80)  | 3352(4) | 3498(4)  | 3657(3) | 40(2) |
| Ru(81) | 5121(1) | 403(1)   | 2687(1) | 18(1) |
| Cl(82) | 5869(1) | 1396(1)  | 4105(1) | 25(1) |
| Cl(83) | 3862(1) | -844(1)  | 1485(1) | 37(1) |
| C(84)  | 5053(4) | 1430(3)  | 2483(3) | 23(1) |
| N(85)  | 4380(3) | 1620(3)  | 2636(2) | 24(1) |
| C(86)  | 4494(4) | 2377(4)  | 2454(3) | 33(1) |
| C(87)  | 5251(4) | 2683(4)  | 2196(3) | 39(2) |
| N(88)  | 5584(3) | 2108(3)  | 2216(2) | 24(1) |
| C(91)  | 3625(4) | 1099(3)  | 2924(3) | 24(1) |
| C(92)  | 2749(4) | 294(4)   | 2336(3) | 28(1) |
| C(93)  | 2037(4) | -220(4)  | 2615(4) | 36(2) |
| C(94)  | 2172(4) | 76(4)    | 3453(4) | 39(2) |
| C(95)  | 3009(4) | 900(4)   | 4014(4) | 36(2) |
| C(96)  | 3762(4) | 1442(4)  | 3769(3) | 29(1) |
| C(97)  | 2545(4) | 29(4)    | 1418(3) | 38(2) |
| C(98)  | 4642(4) | 2398(4)  | 4393(3) | 39(2) |
| C(101) | 6370(4) | 2228(3)  | 1933(3) | 22(1) |
| C(102) | 7293(4) | 2833(3)  | 2518(3) | 24(1) |
| C(103) | 8023(4) | 2920(4)  | 2210(3) | 31(1) |
| C(104) | 7861(4) | 2439(4)  | 1385(4) | 35(1) |
| C(105) | 6946(4) | 1867(4)  | 821(3)  | 31(1) |
| C(106) | 6175(4) | 1747(3)  | 1086(3) | 25(1) |
| C(107) | 7469(4) | 3363(4)  | 3419(3) | 38(2) |
| C(108) | 5178(4) | 1160(4)  | 487(3)  | 32(1) |
| C(110) | 6114(3) | 499(3)   | 2340(3) | 21(1) |
| C(111) | 6433(3) | -110(3)  | 2428(3) | 19(1) |
| C(112) | 5960(3) | -767(3)  | 2755(3) | 19(1) |
| C(113) | 6242(4) | -1359(4) | 2863(3) | 26(1) |
| C(114) | 7030(4) | -1273(4) | 2643(3) | 29(1) |
| C(115) | 7505(4) | -639(4)  | 2317(3) | 28(1) |
| C(116) | 7206(4) | -63(3)   | 2200(3) | 26(1) |
| O(117) | 5210(2) | -749(2)  | 2944(2) | 19(1) |
| C(118) | 4745(4) | -1270(4) | 3429(3) | 29(1) |
| C(119) | 3837(4) | -1295(4) | 3358(3) | 32(1) |



|                    |          |          |         |       |
|--------------------|----------|----------|---------|-------|
| C(120)             | 5397(4)  | -780(4)  | 4312(3) | 38(2) |
| O(1W) <sup>c</sup> | 5058(10) | 3729(10) | 6957(9) | 37(4) |

---

a) Occupation parameter: 0.655(6)

b) Occupation parameter: 0.345(6)

c) Occupation parameter: 0.25 (Not refined)

**Table S10.** Bond lengths [ $\text{\AA}$ ] for **4**

---

|              |            |
|--------------|------------|
| Ru(1)-C(30)  | 1.813(4)   |
| Ru(1)-C(4)   | 1.982(5)   |
| Ru(1)-O(37)  | 2.243(3)   |
| Ru(1)-Cl(3)  | 2.3297(14) |
| Ru(1)-Cl(2)  | 2.3374(13) |
| C(4)-N(8)    | 1.370(6)   |
| C(4)-N(5)    | 1.376(5)   |
| N(5)-C(6)    | 1.380(6)   |
| N(5)-C(11)   | 1.443(6)   |
| C(6)-C(7)    | 1.339(6)   |
| C(6)-H(6)    | 0.9500     |
| C(7)-N(8)    | 1.391(6)   |
| C(7)-H(7)    | 0.9500     |
| N(8)-C(21)   | 1.453(5)   |
| C(11)-C(12)  | 1.385(6)   |
| C(11)-C(16)  | 1.396(6)   |
| C(12)-C(13)  | 1.396(7)   |
| C(12)-C(17)  | 1.502(7)   |
| C(13)-C(14)  | 1.364(7)   |
| C(13)-H(13)  | 0.9500     |
| C(14)-C(15)  | 1.383(7)   |
| C(14)-H(14)  | 0.9500     |
| C(15)-C(16)  | 1.394(7)   |
| C(15)-H(15)  | 0.9500     |
| C(16)-C(18)  | 1.498(7)   |
| C(17)-H(17A) | 0.9800     |
| C(17)-H(17B) | 0.9800     |
| C(17)-H(17C) | 0.9800     |
| C(18)-H(18A) | 0.9800     |
| C(18)-H(18B) | 0.9800     |
| C(18)-H(18C) | 0.9800     |
| C(21)-C(22)  | 1.375(7)   |
| C(21)-C(26)  | 1.396(6)   |
| C(22)-C(23)  | 1.393(6)   |
| C(22)-C(27)  | 1.510(6)   |
| C(23)-C(24)  | 1.373(7)   |
| C(23)-H(23)  | 0.9500     |

|               |            |
|---------------|------------|
| C(24)-C(25)   | 1.386(7)   |
| C(24)-H(24)   | 0.9500     |
| C(25)-C(26)   | 1.385(6)   |
| C(25)-H(25)   | 0.9500     |
| C(26)-C(28)   | 1.508(7)   |
| C(27)-H(27A)  | 0.9800     |
| C(27)-H(27B)  | 0.9800     |
| C(27)-H(27C)  | 0.9800     |
| C(28)-H(28A)  | 0.9800     |
| C(28)-H(28B)  | 0.9800     |
| C(28)-H(28C)  | 0.9800     |
| C(30)-C(31)   | 1.452(6)   |
| C(30)-H(30)   | 0.9500     |
| C(31)-C(36)   | 1.392(6)   |
| C(31)-C(32)   | 1.400(7)   |
| C(32)-C(33)   | 1.364(7)   |
| C(32)-O(37)   | 1.380(5)   |
| C(33)-C(34)   | 1.390(7)   |
| C(33)-H(33)   | 0.9500     |
| C(34)-C(35)   | 1.369(7)   |
| C(34)-H(34)   | 0.9500     |
| C(35)-C(36)   | 1.395(7)   |
| C(35)-H(35)   | 0.9500     |
| C(36)-H(36)   | 0.9500     |
| O(37)-C(38)   | 1.457(6)   |
| C(38)-C(39)   | 1.510(7)   |
| C(38)-C(40)   | 1.528(8)   |
| C(38)-H(38)   | 1.0000     |
| C(39)-H(39A)  | 0.9800     |
| C(39)-H(39B)  | 0.9800     |
| C(39)-H(39C)  | 0.9800     |
| C(40)-H(40A)  | 0.9800     |
| C(40)-H(40B)  | 0.9800     |
| C(40)-H(40C)  | 0.9800     |
| Ru(41)-C(70)  | 1.822(4)   |
| Ru(41)-C(44)  | 1.991(5)   |
| Ru(41)-O(77)  | 2.274(3)   |
| Ru(41)-Cl(42) | 2.3289(14) |
| Ru(41)-Cl(43) | 2.3389(14) |

|               |           |
|---------------|-----------|
| C(44)-N(48)   | 1.368(6)  |
| C(44)-N(45)   | 1.380(5)  |
| N(45)-C(46)   | 1.378(6)  |
| N(45)-C(51)   | 1.442(6)  |
| C(46)-C(47)   | 1.342(6)  |
| C(46)-H(46)   | 0.9500    |
| C(47)-N(48)   | 1.382(6)  |
| C(47)-H(47)   | 0.9500    |
| N(48)-C(61A)  | 1.447(9)  |
| N(48)-C(61B)  | 1.510(18) |
| C(51)-C(52)   | 1.397(7)  |
| C(51)-C(56)   | 1.402(6)  |
| C(52)-C(53)   | 1.391(6)  |
| C(52)-C(57)   | 1.504(7)  |
| C(53)-C(54)   | 1.372(7)  |
| C(53)-H(53)   | 0.9500    |
| C(54)-C(55)   | 1.377(7)  |
| C(54)-H(54)   | 0.9500    |
| C(55)-C(56)   | 1.385(6)  |
| C(55)-H(55)   | 0.9500    |
| C(56)-C(58)   | 1.505(7)  |
| C(57)-H(57A)  | 0.9800    |
| C(57)-H(57B)  | 0.9800    |
| C(57)-H(57C)  | 0.9800    |
| C(58)-H(58A)  | 0.9800    |
| C(58)-H(58B)  | 0.9800    |
| C(58)-H(58C)  | 0.9800    |
| C(61A)-C(62A) | 1.383(12) |
| C(61A)-C(66A) | 1.424(13) |
| C(62A)-C(63A) | 1.404(11) |
| C(62A)-C(67A) | 1.495(12) |
| C(63A)-C(64A) | 1.405(18) |
| C(63A)-H(63A) | 0.9500    |
| C(64A)-C(65A) | 1.363(17) |
| C(64A)-H(64A) | 0.9500    |
| C(65A)-C(66A) | 1.404(12) |
| C(65A)-H(65A) | 0.9500    |
| C(66A)-C(68A) | 1.474(14) |
| C(67A)-H(67A) | 0.9800    |

|               |           |
|---------------|-----------|
| C(67A)-H(67B) | 0.9800    |
| C(67A)-H(67C) | 0.9800    |
| C(68A)-H(68A) | 0.9800    |
| C(68A)-H(68B) | 0.9800    |
| C(68A)-H(68C) | 0.9800    |
| C(61B)-C(62B) | 1.384(17) |
| C(61B)-C(66B) | 1.400(17) |
| C(62B)-C(63B) | 1.395(16) |
| C(62B)-C(67B) | 1.499(18) |
| C(63B)-C(64B) | 1.41(2)   |
| C(63B)-H(63B) | 0.9500    |
| C(64B)-C(65B) | 1.34(3)   |
| C(64B)-H(64B) | 0.9500    |
| C(65B)-C(66B) | 1.409(17) |
| C(65B)-H(65B) | 0.9500    |
| C(66B)-C(68B) | 1.462(19) |
| C(67B)-H(67D) | 0.9800    |
| C(67B)-H(67E) | 0.9800    |
| C(67B)-H(67F) | 0.9800    |
| C(68B)-H(68D) | 0.9800    |
| C(68B)-H(68E) | 0.9800    |
| C(68B)-H(68F) | 0.9800    |
| C(70)-C(71)   | 1.435(6)  |
| C(70)-H(70)   | 0.9500    |
| C(71)-C(72)   | 1.383(7)  |
| C(71)-C(76)   | 1.394(6)  |
| C(72)-O(77)   | 1.370(5)  |
| C(72)-C(73)   | 1.400(6)  |
| C(73)-C(74)   | 1.387(6)  |
| C(73)-H(73)   | 0.9500    |
| C(74)-C(75)   | 1.374(7)  |
| C(74)-H(74)   | 0.9500    |
| C(75)-C(76)   | 1.377(7)  |
| C(75)-H(75)   | 0.9500    |
| C(76)-H(76)   | 0.9500    |
| O(77)-C(78)   | 1.454(5)  |
| C(78)-C(79)   | 1.508(6)  |
| C(78)-C(80)   | 1.519(7)  |
| C(78)-H(78)   | 1.0000    |

|               |            |
|---------------|------------|
| C(79)-H(79A)  | 0.9800     |
| C(79)-H(79B)  | 0.9800     |
| C(79)-H(79C)  | 0.9800     |
| C(80)-H(80A)  | 0.9800     |
| C(80)-H(80B)  | 0.9800     |
| C(80)-H(80C)  | 0.9800     |
| Ru(81)-C(110) | 1.829(5)   |
| Ru(81)-C(84)  | 1.986(5)   |
| Ru(81)-O(117) | 2.263(3)   |
| Ru(81)-Cl(83) | 2.3156(13) |
| Ru(81)-Cl(82) | 2.3237(12) |
| C(84)-N(88)   | 1.365(6)   |
| C(84)-N(85)   | 1.378(6)   |
| N(85)-C(86)   | 1.383(6)   |
| N(85)-C(91)   | 1.440(6)   |
| C(86)-C(87)   | 1.342(7)   |
| C(86)-H(86)   | 0.9500     |
| C(87)-N(88)   | 1.379(6)   |
| C(87)-H(87)   | 0.9500     |
| N(88)-C(101)  | 1.437(6)   |
| C(91)-C(96)   | 1.388(7)   |
| C(91)-C(92)   | 1.398(7)   |
| C(92)-C(93)   | 1.379(7)   |
| C(92)-C(97)   | 1.511(7)   |
| C(93)-C(94)   | 1.379(7)   |
| C(93)-H(93)   | 0.9500     |
| C(94)-C(95)   | 1.361(8)   |
| C(94)-H(94)   | 0.9500     |
| C(95)-C(96)   | 1.397(7)   |
| C(95)-H(95)   | 0.9500     |
| C(96)-C(98)   | 1.505(7)   |
| C(97)-H(97A)  | 0.9800     |
| C(97)-H(97B)  | 0.9800     |
| C(97)-H(97C)  | 0.9800     |
| C(98)-H(98A)  | 0.9800     |
| C(98)-H(98B)  | 0.9800     |
| C(98)-H(98C)  | 0.9800     |
| C(101)-C(106) | 1.392(6)   |
| C(101)-C(102) | 1.405(7)   |

|               |          |
|---------------|----------|
| C(102)-C(103) | 1.388(7) |
| C(102)-C(107) | 1.497(6) |
| C(103)-C(104) | 1.369(7) |
| C(103)-H(103) | 0.9500   |
| C(104)-C(105) | 1.384(7) |
| C(104)-H(104) | 0.9500   |
| C(105)-C(106) | 1.398(7) |
| C(105)-H(105) | 0.9500   |
| C(106)-C(108) | 1.503(7) |
| C(107)-H(10A) | 0.9800   |
| C(107)-H(10B) | 0.9800   |
| C(107)-H(10C) | 0.9800   |
| C(108)-H(10D) | 0.9800   |
| C(108)-H(10E) | 0.9800   |
| C(108)-H(10F) | 0.9800   |
| C(110)-C(111) | 1.447(6) |
| C(110)-H(110) | 0.9500   |
| C(111)-C(112) | 1.393(6) |
| C(111)-C(116) | 1.403(7) |
| C(112)-O(117) | 1.378(5) |
| C(112)-C(113) | 1.385(6) |
| C(113)-C(114) | 1.401(7) |
| C(113)-H(113) | 0.9500   |
| C(114)-C(115) | 1.366(7) |
| C(114)-H(114) | 0.9500   |
| C(115)-C(116) | 1.385(7) |
| C(115)-H(115) | 0.9500   |
| C(116)-H(116) | 0.9500   |
| O(117)-C(118) | 1.475(6) |
| C(118)-C(120) | 1.508(7) |
| C(118)-C(119) | 1.517(7) |
| C(118)-H(118) | 1.0000   |
| C(119)-H(11A) | 0.9800   |
| C(119)-H(11B) | 0.9800   |
| C(119)-H(11C) | 0.9800   |
| C(120)-H(12A) | 0.9800   |
| C(120)-H(12B) | 0.9800   |
| C(120)-H(12C) | 0.9800   |

**Table S11.** Angles [°] for **4**.

---

|                   |            |
|-------------------|------------|
| C(30)-Ru(1)-C(4)  | 100.9(2)   |
| C(30)-Ru(1)-O(37) | 79.82(18)  |
| C(4)-Ru(1)-O(37)  | 177.84(16) |
| C(30)-Ru(1)-Cl(3) | 99.53(15)  |
| C(4)-Ru(1)-Cl(3)  | 93.69(14)  |
| O(37)-Ru(1)-Cl(3) | 88.16(10)  |
| C(30)-Ru(1)-Cl(2) | 99.45(15)  |
| C(4)-Ru(1)-Cl(2)  | 93.14(14)  |
| O(37)-Ru(1)-Cl(2) | 84.73(9)   |
| Cl(3)-Ru(1)-Cl(2) | 158.20(5)  |
| N(8)-C(4)-N(5)    | 102.9(4)   |
| N(8)-C(4)-Ru(1)   | 134.0(3)   |
| N(5)-C(4)-Ru(1)   | 123.0(3)   |
| C(4)-N(5)-C(6)    | 111.7(4)   |
| C(4)-N(5)-C(11)   | 125.7(4)   |
| C(6)-N(5)-C(11)   | 122.3(4)   |
| C(7)-C(6)-N(5)    | 107.1(4)   |
| C(7)-C(6)-H(6)    | 126.4      |
| N(5)-C(6)-H(6)    | 126.4      |
| C(6)-C(7)-N(8)    | 106.8(5)   |
| C(6)-C(7)-H(7)    | 126.6      |
| N(8)-C(7)-H(7)    | 126.6      |
| C(4)-N(8)-C(7)    | 111.6(4)   |
| C(4)-N(8)-C(21)   | 127.5(4)   |
| C(7)-N(8)-C(21)   | 120.6(4)   |
| C(12)-C(11)-C(16) | 122.0(4)   |
| C(12)-C(11)-N(5)  | 118.8(4)   |
| C(16)-C(11)-N(5)  | 119.0(4)   |
| C(11)-C(12)-C(13) | 117.9(5)   |
| C(11)-C(12)-C(17) | 122.0(5)   |
| C(13)-C(12)-C(17) | 119.9(5)   |
| C(14)-C(13)-C(12) | 120.7(5)   |
| C(14)-C(13)-H(13) | 119.6      |
| C(12)-C(13)-H(13) | 119.6      |
| C(13)-C(14)-C(15) | 121.0(5)   |
| C(13)-C(14)-H(14) | 119.5      |
| C(15)-C(14)-H(14) | 119.5      |



|                     |          |
|---------------------|----------|
| C(14)-C(15)-C(16)   | 120.0(5) |
| C(14)-C(15)-H(15)   | 120.0    |
| C(16)-C(15)-H(15)   | 120.0    |
| C(15)-C(16)-C(11)   | 118.0(5) |
| C(15)-C(16)-C(18)   | 120.8(5) |
| C(11)-C(16)-C(18)   | 120.9(5) |
| C(12)-C(17)-H(17A)  | 109.5    |
| C(12)-C(17)-H(17B)  | 109.5    |
| H(17A)-C(17)-H(17B) | 109.5    |
| C(12)-C(17)-H(17C)  | 109.5    |
| H(17A)-C(17)-H(17C) | 109.5    |
| H(17B)-C(17)-H(17C) | 109.5    |
| C(16)-C(18)-H(18A)  | 109.5    |
| C(16)-C(18)-H(18B)  | 109.5    |
| H(18A)-C(18)-H(18B) | 109.5    |
| C(16)-C(18)-H(18C)  | 109.5    |
| H(18A)-C(18)-H(18C) | 109.5    |
| H(18B)-C(18)-H(18C) | 109.5    |
| C(22)-C(21)-C(26)   | 123.2(4) |
| C(22)-C(21)-N(8)    | 119.5(4) |
| C(26)-C(21)-N(8)    | 117.2(4) |
| C(21)-C(22)-C(23)   | 117.3(5) |
| C(21)-C(22)-C(27)   | 121.5(4) |
| C(23)-C(22)-C(27)   | 121.2(5) |
| C(24)-C(23)-C(22)   | 120.7(5) |
| C(24)-C(23)-H(23)   | 119.7    |
| C(22)-C(23)-H(23)   | 119.7    |
| C(23)-C(24)-C(25)   | 121.2(5) |
| C(23)-C(24)-H(24)   | 119.4    |
| C(25)-C(24)-H(24)   | 119.4    |
| C(26)-C(25)-C(24)   | 119.5(5) |
| C(26)-C(25)-H(25)   | 120.2    |
| C(24)-C(25)-H(25)   | 120.2    |
| C(25)-C(26)-C(21)   | 118.1(5) |
| C(25)-C(26)-C(28)   | 120.9(5) |
| C(21)-C(26)-C(28)   | 121.0(4) |
| C(22)-C(27)-H(27A)  | 109.5    |
| C(22)-C(27)-H(27B)  | 109.5    |
| H(27A)-C(27)-H(27B) | 109.5    |

|                     |          |
|---------------------|----------|
| C(22)-C(27)-H(27C)  | 109.5    |
| H(27A)-C(27)-H(27C) | 109.5    |
| H(27B)-C(27)-H(27C) | 109.5    |
| C(26)-C(28)-H(28A)  | 109.5    |
| C(26)-C(28)-H(28B)  | 109.5    |
| H(28A)-C(28)-H(28B) | 109.5    |
| C(26)-C(28)-H(28C)  | 109.5    |
| H(28A)-C(28)-H(28C) | 109.5    |
| H(28B)-C(28)-H(28C) | 109.5    |
| C(31)-C(30)-Ru(1)   | 118.1(4) |
| C(31)-C(30)-H(30)   | 120.9    |
| Ru(1)-C(30)-H(30)   | 120.9    |
| C(36)-C(31)-C(32)   | 118.4(5) |
| C(36)-C(31)-C(30)   | 122.9(5) |
| C(32)-C(31)-C(30)   | 118.7(4) |
| C(33)-C(32)-O(37)   | 124.9(5) |
| C(33)-C(32)-C(31)   | 122.7(5) |
| O(37)-C(32)-C(31)   | 112.4(4) |
| C(32)-C(33)-C(34)   | 117.2(5) |
| C(32)-C(33)-H(33)   | 121.4    |
| C(34)-C(33)-H(33)   | 121.4    |
| C(35)-C(34)-C(33)   | 122.4(5) |
| C(35)-C(34)-H(34)   | 118.8    |
| C(33)-C(34)-H(34)   | 118.8    |
| C(34)-C(35)-C(36)   | 119.6(5) |
| C(34)-C(35)-H(35)   | 120.2    |
| C(36)-C(35)-H(35)   | 120.2    |
| C(31)-C(36)-C(35)   | 119.6(5) |
| C(31)-C(36)-H(36)   | 120.2    |
| C(35)-C(36)-H(36)   | 120.2    |
| C(32)-O(37)-C(38)   | 120.3(4) |
| C(32)-O(37)-Ru(1)   | 109.8(3) |
| C(38)-O(37)-Ru(1)   | 129.8(3) |
| O(37)-C(38)-C(39)   | 107.1(4) |
| O(37)-C(38)-C(40)   | 110.3(4) |
| C(39)-C(38)-C(40)   | 112.7(5) |
| O(37)-C(38)-H(38)   | 108.9    |
| C(39)-C(38)-H(38)   | 108.9    |
| C(40)-C(38)-H(38)   | 108.9    |

|                      |            |
|----------------------|------------|
| C(38)-C(39)-H(39A)   | 109.5      |
| C(38)-C(39)-H(39B)   | 109.5      |
| H(39A)-C(39)-H(39B)  | 109.5      |
| C(38)-C(39)-H(39C)   | 109.5      |
| H(39A)-C(39)-H(39C)  | 109.5      |
| H(39B)-C(39)-H(39C)  | 109.5      |
| C(38)-C(40)-H(40A)   | 109.5      |
| C(38)-C(40)-H(40B)   | 109.5      |
| H(40A)-C(40)-H(40B)  | 109.5      |
| C(38)-C(40)-H(40C)   | 109.5      |
| H(40A)-C(40)-H(40C)  | 109.5      |
| H(40B)-C(40)-H(40C)  | 109.5      |
| C(70)-Ru(41)-C(44)   | 100.5(2)   |
| C(70)-Ru(41)-O(77)   | 78.39(18)  |
| C(44)-Ru(41)-O(77)   | 178.83(16) |
| C(70)-Ru(41)-Cl(42)  | 99.19(17)  |
| C(44)-Ru(41)-Cl(42)  | 93.68(14)  |
| O(77)-Ru(41)-Cl(42)  | 86.08(9)   |
| C(70)-Ru(41)-Cl(43)  | 100.40(18) |
| C(44)-Ru(41)-Cl(43)  | 94.08(14)  |
| O(77)-Ru(41)-Cl(43)  | 86.56(9)   |
| Cl(42)-Ru(41)-Cl(43) | 157.20(5)  |
| N(48)-C(44)-N(45)    | 102.0(4)   |
| N(48)-C(44)-Ru(41)   | 133.0(3)   |
| N(45)-C(44)-Ru(41)   | 124.9(3)   |
| C(46)-N(45)-C(44)    | 111.8(4)   |
| C(46)-N(45)-C(51)    | 121.0(4)   |
| C(44)-N(45)-C(51)    | 127.2(4)   |
| C(47)-C(46)-N(45)    | 107.4(4)   |
| C(47)-C(46)-H(46)    | 126.3      |
| N(45)-C(46)-H(46)    | 126.3      |
| C(46)-C(47)-N(48)    | 106.0(4)   |
| C(46)-C(47)-H(47)    | 127.0      |
| N(48)-C(47)-H(47)    | 127.0      |
| C(44)-N(48)-C(47)    | 112.8(4)   |
| C(44)-N(48)-C(61A)   | 125.6(6)   |
| C(47)-N(48)-C(61A)   | 120.8(7)   |
| C(44)-N(48)-C(61B)   | 127.1(12)  |
| C(47)-N(48)-C(61B)   | 118.1(12)  |

|                      |           |
|----------------------|-----------|
| C(61A)-N(48)-C(61B)  | 21.5(6)   |
| C(52)-C(51)-C(56)    | 122.0(4)  |
| C(52)-C(51)-N(45)    | 118.9(4)  |
| C(56)-C(51)-N(45)    | 118.7(4)  |
| C(53)-C(52)-C(51)    | 117.8(5)  |
| C(53)-C(52)-C(57)    | 119.7(5)  |
| C(51)-C(52)-C(57)    | 122.3(4)  |
| C(54)-C(53)-C(52)    | 120.7(5)  |
| C(54)-C(53)-H(53)    | 119.6     |
| C(52)-C(53)-H(53)    | 119.6     |
| C(53)-C(54)-C(55)    | 120.7(5)  |
| C(53)-C(54)-H(54)    | 119.6     |
| C(55)-C(54)-H(54)    | 119.6     |
| C(54)-C(55)-C(56)    | 121.0(5)  |
| C(54)-C(55)-H(55)    | 119.5     |
| C(56)-C(55)-H(55)    | 119.5     |
| C(55)-C(56)-C(51)    | 117.5(5)  |
| C(55)-C(56)-C(58)    | 120.9(5)  |
| C(51)-C(56)-C(58)    | 121.4(4)  |
| C(52)-C(57)-H(57A)   | 109.5     |
| C(52)-C(57)-H(57B)   | 109.5     |
| H(57A)-C(57)-H(57B)  | 109.5     |
| C(52)-C(57)-H(57C)   | 109.5     |
| H(57A)-C(57)-H(57C)  | 109.5     |
| H(57B)-C(57)-H(57C)  | 109.5     |
| C(56)-C(58)-H(58A)   | 109.5     |
| C(56)-C(58)-H(58B)   | 109.5     |
| H(58A)-C(58)-H(58B)  | 109.5     |
| C(56)-C(58)-H(58C)   | 109.5     |
| H(58A)-C(58)-H(58C)  | 109.5     |
| H(58B)-C(58)-H(58C)  | 109.5     |
| C(62A)-C(61A)-C(66A) | 125.0(8)  |
| C(62A)-C(61A)-N(48)  | 117.2(8)  |
| C(66A)-C(61A)-N(48)  | 117.8(8)  |
| C(61A)-C(62A)-C(63A) | 117.5(10) |
| C(61A)-C(62A)-C(67A) | 120.3(8)  |
| C(63A)-C(62A)-C(67A) | 122.3(10) |
| C(62A)-C(63A)-C(64A) | 119.2(11) |
| C(62A)-C(63A)-H(63A) | 120.4     |

|                      |           |
|----------------------|-----------|
| C(64A)-C(63A)-H(63A) | 120.4     |
| C(65A)-C(64A)-C(63A) | 121.6(9)  |
| C(65A)-C(64A)-H(64A) | 119.2     |
| C(63A)-C(64A)-H(64A) | 119.2     |
| C(64A)-C(65A)-C(66A) | 122.2(10) |
| C(64A)-C(65A)-H(65A) | 118.9     |
| C(66A)-C(65A)-H(65A) | 118.9     |
| C(65A)-C(66A)-C(61A) | 114.5(11) |
| C(65A)-C(66A)-C(68A) | 122.9(10) |
| C(61A)-C(66A)-C(68A) | 122.5(8)  |
| C(62B)-C(61B)-C(66B) | 126.7(16) |
| C(62B)-C(61B)-N(48)  | 120.9(13) |
| C(66B)-C(61B)-N(48)  | 112.4(13) |
| C(61B)-C(62B)-C(63B) | 116.0(17) |
| C(61B)-C(62B)-C(67B) | 120.5(14) |
| C(63B)-C(62B)-C(67B) | 123.4(16) |
| C(62B)-C(63B)-C(64B) | 119.1(16) |
| C(62B)-C(63B)-H(63B) | 120.5     |
| C(64B)-C(63B)-H(63B) | 120.5     |
| C(65B)-C(64B)-C(63B) | 122.3(15) |
| C(65B)-C(64B)-H(64B) | 118.9     |
| C(63B)-C(64B)-H(64B) | 118.9     |
| C(64B)-C(65B)-C(66B) | 121.8(19) |
| C(64B)-C(65B)-H(65B) | 119.1     |
| C(66B)-C(65B)-H(65B) | 119.1     |
| C(61B)-C(66B)-C(65B) | 113.8(16) |
| C(61B)-C(66B)-C(68B) | 124.5(16) |
| C(65B)-C(66B)-C(68B) | 121.2(16) |
| C(62B)-C(67B)-H(67D) | 109.5     |
| C(62B)-C(67B)-H(67E) | 109.5     |
| H(67D)-C(67B)-H(67E) | 109.5     |
| C(62B)-C(67B)-H(67F) | 109.5     |
| H(67D)-C(67B)-H(67F) | 109.5     |
| H(67E)-C(67B)-H(67F) | 109.5     |
| C(66B)-C(68B)-H(68D) | 109.5     |
| C(66B)-C(68B)-H(68E) | 109.5     |
| H(68D)-C(68B)-H(68E) | 109.5     |
| C(66B)-C(68B)-H(68F) | 109.5     |
| H(68D)-C(68B)-H(68F) | 109.5     |

|                      |          |
|----------------------|----------|
| H(68E)-C(68B)-H(68F) | 109.5    |
| C(71)-C(70)-Ru(41)   | 120.3(4) |
| C(71)-C(70)-H(70)    | 119.8    |
| Ru(41)-C(70)-H(70)   | 119.8    |
| C(72)-C(71)-C(76)    | 119.1(4) |
| C(72)-C(71)-C(70)    | 117.7(4) |
| C(76)-C(71)-C(70)    | 123.2(5) |
| O(77)-C(72)-C(71)    | 114.2(4) |
| O(77)-C(72)-C(73)    | 125.0(5) |
| C(71)-C(72)-C(73)    | 120.8(4) |
| C(74)-C(73)-C(72)    | 118.1(5) |
| C(74)-C(73)-H(73)    | 120.9    |
| C(72)-C(73)-H(73)    | 120.9    |
| C(75)-C(74)-C(73)    | 121.9(5) |
| C(75)-C(74)-H(74)    | 119.0    |
| C(73)-C(74)-H(74)    | 119.0    |
| C(74)-C(75)-C(76)    | 119.1(5) |
| C(74)-C(75)-H(75)    | 120.4    |
| C(76)-C(75)-H(75)    | 120.4    |
| C(75)-C(76)-C(71)    | 120.9(5) |
| C(75)-C(76)-H(76)    | 119.6    |
| C(71)-C(76)-H(76)    | 119.6    |
| C(72)-O(77)-C(78)    | 119.9(4) |
| C(72)-O(77)-Ru(41)   | 109.3(3) |
| C(78)-O(77)-Ru(41)   | 129.8(3) |
| O(77)-C(78)-C(79)    | 105.9(4) |
| O(77)-C(78)-C(80)    | 110.9(4) |
| C(79)-C(78)-C(80)    | 112.4(4) |
| O(77)-C(78)-H(78)    | 109.2    |
| C(79)-C(78)-H(78)    | 109.2    |
| C(80)-C(78)-H(78)    | 109.2    |
| C(78)-C(79)-H(79A)   | 109.5    |
| C(78)-C(79)-H(79B)   | 109.5    |
| H(79A)-C(79)-H(79B)  | 109.5    |
| C(78)-C(79)-H(79C)   | 109.5    |
| H(79A)-C(79)-H(79C)  | 109.5    |
| H(79B)-C(79)-H(79C)  | 109.5    |
| C(78)-C(80)-H(80A)   | 109.5    |
| C(78)-C(80)-H(80B)   | 109.5    |

|                      |            |
|----------------------|------------|
| H(80A)-C(80)-H(80B)  | 109.5      |
| C(78)-C(80)-H(80C)   | 109.5      |
| H(80A)-C(80)-H(80C)  | 109.5      |
| H(80B)-C(80)-H(80C)  | 109.5      |
| C(110)-Ru(81)-C(84)  | 101.2(2)   |
| C(110)-Ru(81)-O(117) | 79.07(17)  |
| C(84)-Ru(81)-O(117)  | 178.98(15) |
| C(110)-Ru(81)-Cl(83) | 99.62(14)  |
| C(84)-Ru(81)-Cl(83)  | 93.33(14)  |
| O(117)-Ru(81)-Cl(83) | 87.59(8)   |
| C(110)-Ru(81)-Cl(82) | 102.35(14) |
| C(84)-Ru(81)-Cl(82)  | 91.63(13)  |
| O(117)-Ru(81)-Cl(82) | 87.35(8)   |
| Cl(83)-Ru(81)-Cl(82) | 156.06(5)  |
| N(88)-C(84)-N(85)    | 102.8(4)   |
| N(88)-C(84)-Ru(81)   | 134.3(4)   |
| N(85)-C(84)-Ru(81)   | 122.8(4)   |
| C(84)-N(85)-C(86)    | 111.5(4)   |
| C(84)-N(85)-C(91)    | 126.0(4)   |
| C(86)-N(85)-C(91)    | 122.5(4)   |
| C(87)-C(86)-N(85)    | 106.7(5)   |
| C(87)-C(86)-H(86)    | 126.7      |
| N(85)-C(86)-H(86)    | 126.7      |
| C(86)-C(87)-N(88)    | 107.1(5)   |
| C(86)-C(87)-H(87)    | 126.4      |
| N(88)-C(87)-H(87)    | 126.4      |
| C(84)-N(88)-C(87)    | 111.9(4)   |
| C(84)-N(88)-C(101)   | 127.6(4)   |
| C(87)-N(88)-C(101)   | 120.5(4)   |
| C(96)-C(91)-C(92)    | 121.7(5)   |
| C(96)-C(91)-N(85)    | 119.6(5)   |
| C(92)-C(91)-N(85)    | 118.6(5)   |
| C(93)-C(92)-C(91)    | 118.4(5)   |
| C(93)-C(92)-C(97)    | 119.7(5)   |
| C(91)-C(92)-C(97)    | 121.7(5)   |
| C(94)-C(93)-C(92)    | 120.8(5)   |
| C(94)-C(93)-H(93)    | 119.6      |
| C(92)-C(93)-H(93)    | 119.6      |
| C(95)-C(94)-C(93)    | 119.8(6)   |

|                      |          |
|----------------------|----------|
| C(95)-C(94)-H(94)    | 120.1    |
| C(93)-C(94)-H(94)    | 120.1    |
| C(94)-C(95)-C(96)    | 121.9(5) |
| C(94)-C(95)-H(95)    | 119.0    |
| C(96)-C(95)-H(95)    | 119.0    |
| C(91)-C(96)-C(95)    | 117.1(5) |
| C(91)-C(96)-C(98)    | 122.0(5) |
| C(95)-C(96)-C(98)    | 120.7(5) |
| C(92)-C(97)-H(97A)   | 109.5    |
| C(92)-C(97)-H(97B)   | 109.5    |
| H(97A)-C(97)-H(97B)  | 109.5    |
| C(92)-C(97)-H(97C)   | 109.5    |
| H(97A)-C(97)-H(97C)  | 109.5    |
| H(97B)-C(97)-H(97C)  | 109.5    |
| C(96)-C(98)-H(98A)   | 109.5    |
| C(96)-C(98)-H(98B)   | 109.5    |
| H(98A)-C(98)-H(98B)  | 109.5    |
| C(96)-C(98)-H(98C)   | 109.5    |
| H(98A)-C(98)-H(98C)  | 109.5    |
| H(98B)-C(98)-H(98C)  | 109.5    |
| C(106)-C(101)-C(102) | 123.3(5) |
| C(106)-C(101)-N(88)  | 118.0(5) |
| C(102)-C(101)-N(88)  | 118.7(4) |
| C(103)-C(102)-C(101) | 116.2(5) |
| C(103)-C(102)-C(107) | 122.5(5) |
| C(101)-C(102)-C(107) | 121.3(5) |
| C(104)-C(103)-C(102) | 122.4(5) |
| C(104)-C(103)-H(103) | 118.8    |
| C(102)-C(103)-H(103) | 118.8    |
| C(103)-C(104)-C(105) | 120.0(5) |
| C(103)-C(104)-H(104) | 120.0    |
| C(105)-C(104)-H(104) | 120.0    |
| C(104)-C(105)-C(106) | 120.8(5) |
| C(104)-C(105)-H(105) | 119.6    |
| C(106)-C(105)-H(105) | 119.6    |
| C(101)-C(106)-C(105) | 117.3(5) |
| C(101)-C(106)-C(108) | 120.6(5) |
| C(105)-C(106)-C(108) | 122.1(5) |
| C(102)-C(107)-H(10A) | 109.5    |



|                      |          |
|----------------------|----------|
| C(102)-C(107)-H(10B) | 109.5    |
| H(10A)-C(107)-H(10B) | 109.5    |
| C(102)-C(107)-H(10C) | 109.5    |
| H(10A)-C(107)-H(10C) | 109.5    |
| H(10B)-C(107)-H(10C) | 109.5    |
| C(106)-C(108)-H(10D) | 109.5    |
| C(106)-C(108)-H(10E) | 109.5    |
| H(10D)-C(108)-H(10E) | 109.5    |
| C(106)-C(108)-H(10F) | 109.5    |
| H(10D)-C(108)-H(10F) | 109.5    |
| H(10E)-C(108)-H(10F) | 109.5    |
| C(111)-C(110)-Ru(81) | 118.8(4) |
| C(111)-C(110)-H(110) | 120.6    |
| Ru(81)-C(110)-H(110) | 120.6    |
| C(112)-C(111)-C(116) | 118.4(4) |
| C(112)-C(111)-C(110) | 119.1(5) |
| C(116)-C(111)-C(110) | 122.5(5) |
| O(117)-C(112)-C(113) | 125.8(5) |
| O(117)-C(112)-C(111) | 112.6(4) |
| C(113)-C(112)-C(111) | 121.6(5) |
| C(112)-C(113)-C(114) | 118.1(5) |
| C(112)-C(113)-H(113) | 121.0    |
| C(114)-C(113)-H(113) | 121.0    |
| C(115)-C(114)-C(113) | 121.7(5) |
| C(115)-C(114)-H(114) | 119.1    |
| C(113)-C(114)-H(114) | 119.1    |
| C(114)-C(115)-C(116) | 119.5(5) |
| C(114)-C(115)-H(115) | 120.2    |
| C(116)-C(115)-H(115) | 120.2    |
| C(115)-C(116)-C(111) | 120.7(5) |
| C(115)-C(116)-H(116) | 119.7    |
| C(111)-C(116)-H(116) | 119.7    |
| C(112)-O(117)-C(118) | 119.2(4) |
| C(112)-O(117)-Ru(81) | 110.3(3) |
| C(118)-O(117)-Ru(81) | 128.9(3) |
| O(117)-C(118)-C(120) | 111.1(4) |
| O(117)-C(118)-C(119) | 105.3(4) |
| C(120)-C(118)-C(119) | 113.5(4) |
| O(117)-C(118)-H(118) | 108.9    |

|                      |       |
|----------------------|-------|
| C(120)-C(118)-H(118) | 108.9 |
| C(119)-C(118)-H(118) | 108.9 |
| C(118)-C(119)-H(11A) | 109.5 |
| C(118)-C(119)-H(11B) | 109.5 |
| H(11A)-C(119)-H(11B) | 109.5 |
| C(118)-C(119)-H(11C) | 109.5 |
| H(11A)-C(119)-H(11C) | 109.5 |
| H(11B)-C(119)-H(11C) | 109.5 |
| C(118)-C(120)-H(12A) | 109.5 |
| C(118)-C(120)-H(12B) | 109.5 |
| H(12A)-C(120)-H(12B) | 109.5 |
| C(118)-C(120)-H(12C) | 109.5 |
| H(12A)-C(120)-H(12C) | 109.5 |
| H(12B)-C(120)-H(12C) | 109.5 |

---

**Table S12.** Anisotropic displacement parameters ( $\text{\AA}^2 \times 10^3$ ) for **4**. The anisotropic displacement factor exponent takes the form:  $-2\pi^2 [ h^2 a^* 2 U^{11} + \dots + 2 h k a^* b^* U^{12} ]$

|       | U <sup>11</sup> | U <sup>22</sup> | U <sup>33</sup> | U <sup>23</sup> | U <sup>13</sup> | U <sup>12</sup> |
|-------|-----------------|-----------------|-----------------|-----------------|-----------------|-----------------|
| Ru(1) | 20(1)           | 17(1)           | 20(1)           | 8(1)            | 6(1)            | 9(1)            |
| Cl(2) | 34(1)           | 22(1)           | 32(1)           | 14(1)           | 6(1)            | 14(1)           |
| Cl(3) | 31(1)           | 30(1)           | 26(1)           | 15(1)           | 11(1)           | 9(1)            |
| C(4)  | 21(3)           | 19(2)           | 14(3)           | 8(2)            | 3(2)            | 8(2)            |
| N(5)  | 19(3)           | 22(2)           | 19(2)           | 5(2)            | 5(2)            | 10(2)           |
| C(6)  | 21(3)           | 25(3)           | 26(3)           | 2(2)            | 1(3)            | 9(3)            |
| C(7)  | 18(3)           | 27(3)           | 28(3)           | 0(2)            | 3(3)            | 6(3)            |
| N(8)  | 21(3)           | 22(2)           | 18(2)           | 6(2)            | 7(2)            | 11(2)           |
| C(11) | 15(3)           | 15(2)           | 13(3)           | 3(2)            | 0(2)            | 3(2)            |
| C(12) | 24(3)           | 21(3)           | 19(3)           | 7(2)            | 3(2)            | 10(2)           |
| C(13) | 30(3)           | 33(3)           | 26(3)           | 14(3)           | 15(3)           | 13(3)           |
| C(14) | 31(4)           | 39(3)           | 28(3)           | 5(3)            | 7(3)            | 22(3)           |
| C(15) | 34(4)           | 29(3)           | 29(3)           | 5(3)            | 1(3)            | 22(3)           |
| C(16) | 18(3)           | 19(3)           | 23(3)           | 9(2)            | -2(2)           | 5(2)            |
| C(17) | 34(4)           | 23(3)           | 35(3)           | 16(3)           | 1(3)            | 9(3)            |
| C(18) | 36(4)           | 19(3)           | 34(3)           | 11(2)           | 2(3)            | 6(3)            |
| C(21) | 10(3)           | 17(2)           | 23(3)           | 5(2)            | 4(2)            | 2(2)            |
| C(22) | 31(3)           | 27(3)           | 30(3)           | 17(2)           | 15(3)           | 18(3)           |
| C(23) | 40(4)           | 33(3)           | 19(3)           | 10(2)           | 9(3)            | 20(3)           |
| C(24) | 36(4)           | 28(3)           | 31(3)           | 3(3)            | 8(3)            | 20(3)           |
| C(25) | 28(3)           | 24(3)           | 37(3)           | 13(3)           | 8(3)            | 15(3)           |
| C(26) | 20(3)           | 28(3)           | 25(3)           | 14(2)           | 8(2)            | 14(2)           |
| C(27) | 49(4)           | 33(3)           | 40(4)           | 27(3)           | 21(3)           | 26(3)           |
| C(28) | 31(3)           | 36(3)           | 30(3)           | 22(3)           | 11(3)           | 20(3)           |
| C(30) | 22(3)           | 23(3)           | 24(3)           | 13(2)           | 6(2)            | 15(2)           |
| C(31) | 17(3)           | 18(2)           | 25(3)           | 12(2)           | 3(2)            | 7(2)            |
| C(32) | 16(3)           | 20(3)           | 25(3)           | 15(2)           | 4(2)            | 5(2)            |
| C(33) | 22(3)           | 33(3)           | 31(3)           | 23(3)           | 8(3)            | 10(3)           |
| C(34) | 19(3)           | 34(3)           | 28(3)           | 22(3)           | 1(3)            | 0(3)            |
| C(35) | 31(4)           | 20(3)           | 25(3)           | 10(2)           | 7(3)            | 5(3)            |
| C(36) | 29(3)           | 21(3)           | 24(3)           | 12(2)           | 8(3)            | 9(3)            |
| O(37) | 19(2)           | 26(2)           | 32(2)           | 9(2)            | 9(2)            | 10(2)           |
| C(38) | 28(4)           | 44(4)           | 58(4)           | 17(3)           | 21(3)           | 27(3)           |
| C(39) | 47(4)           | 40(4)           | 71(5)           | 0(3)            | 28(4)           | 24(3)           |

|        |       |       |       |       |       |       |
|--------|-------|-------|-------|-------|-------|-------|
| C(40)  | 30(4) | 53(4) | 47(4) | 11(3) | 22(3) | 14(3) |
| Ru(41) | 23(1) | 15(1) | 16(1) | 7(1)  | 6(1)  | 9(1)  |
| Cl(42) | 24(1) | 26(1) | 27(1) | 7(1)  | 7(1)  | 13(1) |
| Cl(43) | 22(1) | 49(1) | 27(1) | 19(1) | 10(1) | 15(1) |
| C(44)  | 12(3) | 17(2) | 23(3) | 8(2)  | 3(2)  | 5(2)  |
| N(45)  | 20(2) | 19(2) | 16(2) | 9(2)  | 5(2)  | 10(2) |
| C(46)  | 39(4) | 26(3) | 15(3) | 9(2)  | 9(3)  | 18(3) |
| C(47)  | 39(4) | 28(3) | 16(3) | 14(2) | 13(3) | 19(3) |
| N(48)  | 29(3) | 20(2) | 17(2) | 10(2) | 8(2)  | 14(2) |
| C(51)  | 26(3) | 13(2) | 22(3) | 8(2)  | 13(2) | 11(2) |
| C(52)  | 22(3) | 23(3) | 18(3) | 10(2) | 8(2)  | 11(2) |
| C(53)  | 25(3) | 27(3) | 25(3) | 10(2) | 9(3)  | 14(3) |
| C(54)  | 46(4) | 22(3) | 24(3) | 15(2) | 13(3) | 20(3) |
| C(55)  | 27(3) | 20(3) | 21(3) | 5(2)  | 6(3)  | 6(3)  |
| C(56)  | 26(3) | 19(3) | 15(3) | 5(2)  | 7(2)  | 11(2) |
| C(57)  | 21(3) | 29(3) | 36(3) | 9(3)  | 10(3) | 11(3) |
| C(58)  | 21(3) | 24(3) | 29(3) | 5(2)  | 5(3)  | 7(3)  |
| C(61A) | 53(4) | 20(3) | 16(4) | 13(3) | 16(4) | 22(3) |
| C(62A) | 63(4) | 24(3) | 25(4) | 17(3) | 23(4) | 28(3) |
| C(63A) | 84(4) | 25(4) | 32(4) | 14(4) | 30(4) | 31(4) |
| C(64A) | 88(5) | 22(4) | 25(4) | 12(4) | 24(4) | 20(4) |
| C(65A) | 72(5) | 25(3) | 25(4) | 11(3) | 14(4) | 11(3) |
| C(66A) | 56(5) | 24(3) | 20(4) | 18(3) | 8(5)  | 19(4) |
| C(67A) | 59(6) | 46(6) | 40(6) | 14(5) | 16(6) | 43(5) |
| C(68A) | 32(5) | 33(5) | 34(5) | 21(4) | 6(4)  | 6(4)  |
| C(61B) | 60(5) | 21(4) | 25(5) | 13(4) | 20(6) | 21(4) |
| C(62B) | 67(6) | 27(5) | 27(5) | 18(5) | 23(6) | 27(5) |
| C(63B) | 74(5) | 30(4) | 30(5) | 21(4) | 29(5) | 31(4) |
| C(64B) | 87(5) | 18(5) | 31(5) | 17(5) | 30(5) | 24(4) |
| C(65B) | 81(5) | 22(4) | 31(5) | 14(5) | 25(5) | 18(4) |
| C(66B) | 65(5) | 23(4) | 25(4) | 13(4) | 19(5) | 17(4) |
| C(67B) | 59(8) | 40(7) | 30(9) | 24(7) | 18(7) | 38(6) |
| C(68B) | 54(7) | 29(7) | 33(8) | 7(7)  | 20(8) | 8(6)  |
| C(70)  | 47(4) | 17(3) | 21(3) | 11(2) | 11(3) | 13(3) |
| C(71)  | 31(3) | 18(3) | 19(3) | 9(2)  | 12(2) | 8(2)  |
| C(72)  | 24(3) | 22(3) | 14(3) | 4(2)  | 6(2)  | 9(2)  |
| C(73)  | 24(3) | 33(3) | 22(3) | 14(2) | 11(2) | 15(3) |
| C(74)  | 31(3) | 33(3) | 16(3) | 1(2)  | 8(3)  | 18(3) |
| C(75)  | 31(3) | 21(3) | 28(3) | 4(2)  | 4(3)  | 13(3) |

|        |       |       |       |       |       |       |
|--------|-------|-------|-------|-------|-------|-------|
| C(76)  | 38(4) | 18(3) | 24(3) | 8(2)  | 6(3)  | 9(3)  |
| O(77)  | 31(2) | 19(2) | 17(2) | 11(1) | 9(2)  | 14(2) |
| C(78)  | 34(3) | 29(3) | 21(3) | 17(2) | 13(3) | 20(3) |
| C(79)  | 40(4) | 28(3) | 38(3) | 23(3) | 20(3) | 20(3) |
| C(80)  | 54(4) | 53(4) | 33(3) | 22(3) | 12(3) | 41(4) |
| Ru(81) | 21(1) | 18(1) | 16(1) | 8(1)  | 7(1)  | 11(1) |
| Cl(82) | 28(1) | 27(1) | 18(1) | 6(1)  | 5(1)  | 17(1) |
| Cl(83) | 43(1) | 25(1) | 26(1) | 4(1)  | -7(1) | 16(1) |
| C(84)  | 29(3) | 25(3) | 16(3) | 9(2)  | 9(2)  | 15(3) |
| N(85)  | 28(3) | 24(2) | 32(3) | 19(2) | 17(2) | 17(2) |
| C(86)  | 46(4) | 36(3) | 51(4) | 37(3) | 33(3) | 30(3) |
| C(87)  | 56(4) | 35(3) | 51(4) | 30(3) | 29(3) | 33(3) |
| N(88)  | 29(3) | 21(2) | 30(3) | 17(2) | 14(2) | 15(2) |
| C(91)  | 29(3) | 26(3) | 33(3) | 21(2) | 19(3) | 20(3) |
| C(92)  | 36(4) | 32(3) | 34(3) | 20(3) | 16(3) | 27(3) |
| C(93)  | 29(4) | 33(3) | 49(4) | 21(3) | 10(3) | 19(3) |
| C(94)  | 38(4) | 53(4) | 60(4) | 41(4) | 36(4) | 33(4) |
| C(95)  | 55(5) | 59(4) | 39(4) | 36(3) | 34(3) | 49(4) |
| C(96)  | 37(4) | 41(3) | 27(3) | 17(3) | 13(3) | 32(3) |
| C(97)  | 41(4) | 52(4) | 35(3) | 20(3) | 15(3) | 33(3) |
| C(98)  | 50(4) | 49(4) | 36(3) | 18(3) | 18(3) | 39(3) |
| C(101) | 27(3) | 21(3) | 30(3) | 20(2) | 17(3) | 15(3) |
| C(102) | 31(3) | 18(3) | 23(3) | 14(2) | 8(3)  | 10(3) |
| C(103) | 21(3) | 36(3) | 36(3) | 23(3) | 8(3)  | 12(3) |
| C(104) | 30(4) | 40(3) | 52(4) | 33(3) | 24(3) | 21(3) |
| C(105) | 43(4) | 27(3) | 27(3) | 13(2) | 17(3) | 20(3) |
| C(106) | 28(3) | 22(3) | 25(3) | 13(2) | 8(3)  | 13(3) |
| C(107) | 37(4) | 29(3) | 29(3) | 9(3)  | 3(3)  | 9(3)  |
| C(108) | 36(4) | 31(3) | 28(3) | 12(3) | 9(3)  | 20(3) |
| C(110) | 27(3) | 22(3) | 20(3) | 9(2)  | 13(2) | 16(2) |
| C(111) | 16(3) | 14(2) | 15(3) | 1(2)  | -4(2) | 5(2)  |
| C(112) | 17(3) | 23(3) | 15(3) | 6(2)  | 6(2)  | 11(2) |
| C(113) | 32(3) | 34(3) | 22(3) | 19(2) | 9(3)  | 20(3) |
| C(114) | 31(3) | 34(3) | 28(3) | 12(3) | 12(3) | 23(3) |
| C(115) | 22(3) | 33(3) | 26(3) | 6(2)  | 9(3)  | 17(3) |
| C(116) | 29(3) | 21(3) | 22(3) | 7(2)  | 12(3) | 11(3) |
| O(117) | 21(2) | 25(2) | 21(2) | 15(2) | 12(2) | 15(2) |
| C(118) | 33(4) | 33(3) | 39(3) | 27(3) | 23(3) | 21(3) |
| C(119) | 33(4) | 36(3) | 39(3) | 26(3) | 23(3) | 20(3) |

C(120) 45(4) 57(4) 35(4) 32(3) 21(3) 35(3)

---

**Table S13.** Hydrogen coordinates ( $\times 10^4$ ) and isotropic displacement parameters ( $\text{\AA}^2 \times 10^3$ ) for **4**.

|        | x     | y    | z     | U(eq) |
|--------|-------|------|-------|-------|
| H(6)   | -2402 | 1024 | 4114  | 35    |
| H(7)   | -2524 | 2087 | 5309  | 38    |
| H(13)  | 120   | 1602 | 2652  | 37    |
| H(14)  | 328   | 417  | 2736  | 41    |
| H(15)  | -174  | -248 | 3659  | 38    |
| H(17A) | -238  | 2772 | 3172  | 51    |
| H(17B) | -378  | 3017 | 4061  | 51    |
| H(17C) | -1270 | 2163 | 3243  | 51    |
| H(18A) | -716  | 635  | 5329  | 53    |
| H(18B) | -903  | -360 | 4687  | 53    |
| H(18C) | -1697 | -129 | 4569  | 53    |
| H(23)  | -786  | 4172 | 8487  | 38    |
| H(24)  | -505  | 5573 | 8399  | 41    |
| H(25)  | -407  | 5761 | 7178  | 36    |
| H(27A) | -1664 | 1964 | 6851  | 52    |
| H(27B) | -1274 | 2514 | 7844  | 52    |
| H(27C) | -561  | 2501 | 7348  | 52    |
| H(28A) | -498  | 5156 | 5776  | 44    |
| H(28B) | -1182 | 3997 | 5259  | 44    |
| H(28C) | -54   | 4520 | 5604  | 44    |
| H(30)  | 860   | 4456 | 7057  | 26    |
| H(33)  | 4158  | 4800 | 7876  | 34    |
| H(34)  | 4575  | 6011 | 9180  | 39    |
| H(35)  | 3586  | 6517 | 9487  | 36    |
| H(36)  | 2089  | 5756 | 8502  | 32    |
| H(38)  | 3511  | 3530 | 6705  | 49    |
| H(39A) | 2085  | 2152 | 5676  | 88    |
| H(39B) | 2916  | 2472 | 5279  | 88    |
| H(39C) | 2147  | 2728 | 5121  | 88    |
| H(40A) | 3494  | 4521 | 5697  | 75    |
| H(40B) | 4276  | 4290 | 5891  | 75    |
| H(40C) | 4218  | 5049 | 6622  | 75    |
| H(46)  | 1799  | 2126 | -1703 | 31    |

|        |      |      |       |    |
|--------|------|------|-------|----|
| H(47)  | 2271 | 3816 | -1364 | 31 |
| H(53)  | 2872 | 535  | -175  | 32 |
| H(54)  | 1322 | -727 | -480  | 35 |
| H(55)  | 73   | -559 | -790  | 34 |
| H(57A) | 4024 | 2324 | 287   | 48 |
| H(57B) | 3645 | 2914 | 27    | 48 |
| H(57C) | 3705 | 2123 | -666  | 48 |
| H(58A) | -550 | 301  | -1066 | 45 |
| H(58B) | 83   | 1066 | -1401 | 45 |
| H(58C) | 96   | 1442 | -463  | 45 |
| H(63A) | 2221 | 6547 | 773   | 54 |
| H(64A) | 3878 | 7614 | 1431  | 59 |
| H(65A) | 4845 | 7058 | 1377  | 58 |
| H(67A) | 1009 | 4291 | -717  | 64 |
| H(67B) | 826  | 4906 | 23    | 64 |
| H(67C) | 937  | 4063 | 78    | 64 |
| H(68A) | 5105 | 5797 | 823   | 57 |
| H(68B) | 4282 | 4840 | 14    | 57 |
| H(68C) | 4333 | 4857 | 915   | 57 |
| H(63B) | 1244 | 5871 | 255   | 48 |
| H(64B) | 2777 | 7262 | 1070  | 54 |
| H(65B) | 4056 | 7177 | 1319  | 58 |
| H(67D) | 684  | 3600 | -957  | 53 |
| H(67E) | 189  | 4106 | -526  | 53 |
| H(67F) | 510  | 3570 | -109  | 53 |
| H(68D) | 4790 | 6324 | 1050  | 70 |
| H(68E) | 4222 | 5271 | 282   | 70 |
| H(68F) | 4175 | 5366 | 1188  | 70 |
| H(70)  | 2725 | 5096 | 1567  | 37 |
| H(73)  | 2510 | 4513 | 4278  | 31 |
| H(74)  | 2930 | 6110 | 4954  | 35 |
| H(75)  | 3298 | 7121 | 4285  | 37 |
| H(76)  | 3110 | 6495 | 2879  | 36 |
| H(78)  | 1919 | 2964 | 3417  | 29 |
| H(79A) | 1345 | 1813 | 2028  | 46 |
| H(79B) | 1928 | 1611 | 2622  | 46 |
| H(79C) | 2408 | 2139 | 2066  | 46 |
| H(80A) | 3793 | 3614 | 3341  | 60 |
| H(80B) | 3344 | 3055 | 3889  | 60 |



|        |      |       |      |    |
|--------|------|-------|------|----|
| H(80C) | 3560 | 4117  | 4109 | 60 |
| H(86)  | 4111 | 2630  | 2502 | 40 |
| H(87)  | 5509 | 3199  | 2031 | 47 |
| H(93)  | 1445 | -784  | 2225 | 43 |
| H(94)  | 1683 | -293  | 3639 | 47 |
| H(95)  | 3084 | 1111  | 4588 | 43 |
| H(97A) | 2360 | 433   | 1280 | 58 |
| H(97B) | 2024 | -660  | 1100 | 58 |
| H(97C) | 3116 | 143   | 1277 | 58 |
| H(98A) | 5184 | 2527  | 4196 | 59 |
| H(98B) | 4773 | 2369  | 4927 | 59 |
| H(98C) | 4544 | 2922  | 4464 | 59 |
| H(103) | 8658 | 3327  | 2585 | 37 |
| H(104) | 8376 | 2498  | 1200 | 42 |
| H(105) | 6841 | 1553  | 247  | 37 |
| H(10A) | 7198 | 2893  | 3655 | 57 |
| H(10B) | 7169 | 3726  | 3477 | 57 |
| H(10C) | 8156 | 3818  | 3714 | 57 |
| H(10D) | 4770 | 612   | 607  | 48 |
| H(10E) | 5181 | 912   | -82  | 48 |
| H(10F) | 4934 | 1573  | 545  | 48 |
| H(110) | 6416 | 941   | 2107 | 25 |
| H(113) | 5911 | -1810 | 3081 | 32 |
| H(114) | 7238 | -1667 | 2722 | 34 |
| H(115) | 8038 | -594  | 2173 | 34 |
| H(116) | 7528 | 369   | 1964 | 31 |
| H(118) | 4574 | -1953 | 3164 | 35 |
| H(11A) | 3998 | -628  | 3615 | 47 |
| H(11B) | 3472 | -1667 | 3642 | 47 |
| H(11C) | 3454 | -1606 | 2771 | 47 |
| H(12A) | 5957 | -808  | 4315 | 56 |
| H(12B) | 5058 | -1116 | 4629 | 56 |
| H(12C) | 5599 | -98   | 4565 | 56 |

---

**Table S14.** Torsion angles [°] for **4**.

---

|                         |           |
|-------------------------|-----------|
| C(30)-Ru(1)-C(4)-N(8)   | -11.3(5)  |
| O(37)-Ru(1)-C(4)-N(8)   | 99(4)     |
| Cl(3)-Ru(1)-C(4)-N(8)   | -111.7(5) |
| Cl(2)-Ru(1)-C(4)-N(8)   | 89.0(5)   |
| C(30)-Ru(1)-C(4)-N(5)   | 174.4(4)  |
| O(37)-Ru(1)-C(4)-N(5)   | -75(4)    |
| Cl(3)-Ru(1)-C(4)-N(5)   | 73.9(4)   |
| Cl(2)-Ru(1)-C(4)-N(5)   | -85.4(4)  |
| N(8)-C(4)-N(5)-C(6)     | 1.0(5)    |
| Ru(1)-C(4)-N(5)-C(6)    | 176.9(3)  |
| N(8)-C(4)-N(5)-C(11)    | 174.8(4)  |
| Ru(1)-C(4)-N(5)-C(11)   | -9.4(7)   |
| C(4)-N(5)-C(6)-C(7)     | -1.1(6)   |
| C(11)-N(5)-C(6)-C(7)    | -175.1(5) |
| N(5)-C(6)-C(7)-N(8)     | 0.7(6)    |
| N(5)-C(4)-N(8)-C(7)     | -0.6(5)   |
| Ru(1)-C(4)-N(8)-C(7)    | -175.7(4) |
| N(5)-C(4)-N(8)-C(21)    | -173.9(4) |
| Ru(1)-C(4)-N(8)-C(21)   | 10.9(8)   |
| C(6)-C(7)-N(8)-C(4)     | 0.0(6)    |
| C(6)-C(7)-N(8)-C(21)    | 173.8(4)  |
| C(4)-N(5)-C(11)-C(12)   | -90.9(6)  |
| C(6)-N(5)-C(11)-C(12)   | 82.2(6)   |
| C(4)-N(5)-C(11)-C(16)   | 94.3(6)   |
| C(6)-N(5)-C(11)-C(16)   | -92.6(6)  |
| C(16)-C(11)-C(12)-C(13) | -6.1(7)   |
| N(5)-C(11)-C(12)-C(13)  | 179.3(4)  |
| C(16)-C(11)-C(12)-C(17) | 168.7(4)  |
| N(5)-C(11)-C(12)-C(17)  | -5.8(7)   |
| C(11)-C(12)-C(13)-C(14) | 0.9(8)    |
| C(17)-C(12)-C(13)-C(14) | -174.1(5) |
| C(12)-C(13)-C(14)-C(15) | 3.5(8)    |
| C(13)-C(14)-C(15)-C(16) | -2.9(8)   |
| C(14)-C(15)-C(16)-C(11) | -2.2(7)   |
| C(14)-C(15)-C(16)-C(18) | 171.5(5)  |
| C(12)-C(11)-C(16)-C(15) | 6.7(7)    |
| N(5)-C(11)-C(16)-C(15)  | -178.7(4) |

|                         |           |
|-------------------------|-----------|
| C(12)-C(11)-C(16)-C(18) | -166.9(5) |
| N(5)-C(11)-C(16)-C(18)  | 7.6(7)    |
| C(4)-N(8)-C(21)-C(22)   | -95.9(6)  |
| C(7)-N(8)-C(21)-C(22)   | 91.3(6)   |
| C(4)-N(8)-C(21)-C(26)   | 87.8(6)   |
| C(7)-N(8)-C(21)-C(26)   | -85.0(6)  |
| C(26)-C(21)-C(22)-C(23) | -1.3(8)   |
| N(8)-C(21)-C(22)-C(23)  | -177.5(4) |
| C(26)-C(21)-C(22)-C(27) | -179.8(5) |
| N(8)-C(21)-C(22)-C(27)  | 4.1(7)    |
| C(21)-C(22)-C(23)-C(24) | 2.0(8)    |
| C(27)-C(22)-C(23)-C(24) | -179.5(5) |
| C(22)-C(23)-C(24)-C(25) | -1.7(9)   |
| C(23)-C(24)-C(25)-C(26) | 0.5(8)    |
| C(24)-C(25)-C(26)-C(21) | 0.2(8)    |
| C(24)-C(25)-C(26)-C(28) | -178.9(5) |
| C(22)-C(21)-C(26)-C(25) | 0.2(8)    |
| N(8)-C(21)-C(26)-C(25)  | 176.5(4)  |
| C(22)-C(21)-C(26)-C(28) | 179.3(5)  |
| N(8)-C(21)-C(26)-C(28)  | -4.5(7)   |
| C(4)-Ru(1)-C(30)-C(31)  | 169.7(4)  |
| O(37)-Ru(1)-C(30)-C(31) | -8.3(4)   |
| Cl(3)-Ru(1)-C(30)-C(31) | -94.6(4)  |
| Cl(2)-Ru(1)-C(30)-C(31) | 74.6(4)   |
| Ru(1)-C(30)-C(31)-C(36) | -172.5(4) |
| Ru(1)-C(30)-C(31)-C(32) | 6.1(6)    |
| C(36)-C(31)-C(32)-C(33) | 3.2(7)    |
| C(30)-C(31)-C(32)-C(33) | -175.4(5) |
| C(36)-C(31)-C(32)-O(37) | -178.1(4) |
| C(30)-C(31)-C(32)-O(37) | 3.3(6)    |
| O(37)-C(32)-C(33)-C(34) | 179.9(4)  |
| C(31)-C(32)-C(33)-C(34) | -1.6(8)   |
| C(32)-C(33)-C(34)-C(35) | -1.0(8)   |
| C(33)-C(34)-C(35)-C(36) | 1.8(8)    |
| C(32)-C(31)-C(36)-C(35) | -2.3(7)   |
| C(30)-C(31)-C(36)-C(35) | 176.2(5)  |
| C(34)-C(35)-C(36)-C(31) | -0.1(8)   |
| C(33)-C(32)-O(37)-C(38) | -12.9(7)  |
| C(31)-C(32)-O(37)-C(38) | 168.4(4)  |

|                           |           |
|---------------------------|-----------|
| C(33)-C(32)-O(37)-Ru(1)   | 169.6(4)  |
| C(31)-C(32)-O(37)-Ru(1)   | -9.0(5)   |
| C(30)-Ru(1)-O(37)-C(32)   | 9.9(3)    |
| C(4)-Ru(1)-O(37)-C(32)    | -101(4)   |
| Cl(3)-Ru(1)-O(37)-C(32)   | 109.9(3)  |
| Cl(2)-Ru(1)-O(37)-C(32)   | -90.7(3)  |
| C(30)-Ru(1)-O(37)-C(38)   | -167.2(4) |
| C(4)-Ru(1)-O(37)-C(38)    | 82(4)     |
| Cl(3)-Ru(1)-O(37)-C(38)   | -67.1(4)  |
| Cl(2)-Ru(1)-O(37)-C(38)   | 92.2(4)   |
| C(32)-O(37)-C(38)-C(39)   | 167.0(5)  |
| Ru(1)-O(37)-C(38)-C(39)   | -16.2(7)  |
| C(32)-O(37)-C(38)-C(40)   | -70.0(6)  |
| Ru(1)-O(37)-C(38)-C(40)   | 106.8(5)  |
| C(70)-Ru(41)-C(44)-N(48)  | -1.9(5)   |
| O(77)-Ru(41)-C(44)-N(48)  | 20(9)     |
| Cl(42)-Ru(41)-C(44)-N(48) | 98.2(5)   |
| Cl(43)-Ru(41)-C(44)-N(48) | -103.3(5) |
| C(70)-Ru(41)-C(44)-N(45)  | -177.7(4) |
| O(77)-Ru(41)-C(44)-N(45)  | -156(8)   |
| Cl(42)-Ru(41)-C(44)-N(45) | -77.6(4)  |
| Cl(43)-Ru(41)-C(44)-N(45) | 80.9(4)   |
| N(48)-C(44)-N(45)-C(46)   | -1.2(5)   |
| Ru(41)-C(44)-N(45)-C(46)  | 175.7(3)  |
| N(48)-C(44)-N(45)-C(51)   | 177.1(4)  |
| Ru(41)-C(44)-N(45)-C(51)  | -6.1(7)   |
| C(44)-N(45)-C(46)-C(47)   | 1.5(6)    |
| C(51)-N(45)-C(46)-C(47)   | -176.9(4) |
| N(45)-C(46)-C(47)-N(48)   | -1.0(6)   |
| N(45)-C(44)-N(48)-C(47)   | 0.5(5)    |
| Ru(41)-C(44)-N(48)-C(47)  | -175.9(4) |
| N(45)-C(44)-N(48)-C(61A)  | -169.1(6) |
| Ru(41)-C(44)-N(48)-C(61A) | 14.4(9)   |
| N(45)-C(44)-N(48)-C(61B)  | 164.1(9)  |
| Ru(41)-C(44)-N(48)-C(61B) | -12.4(11) |
| C(46)-C(47)-N(48)-C(44)   | 0.3(6)    |
| C(46)-C(47)-N(48)-C(61A)  | 170.5(6)  |
| C(46)-C(47)-N(48)-C(61B)  | -164.9(9) |
| C(46)-N(45)-C(51)-C(52)   | 89.6(6)   |

|                             |            |
|-----------------------------|------------|
| C(44)-N(45)-C(51)-C(52)     | -88.6(6)   |
| C(46)-N(45)-C(51)-C(56)     | -83.4(6)   |
| C(44)-N(45)-C(51)-C(56)     | 98.5(6)    |
| C(56)-C(51)-C(52)-C(53)     | -4.1(7)    |
| N(45)-C(51)-C(52)-C(53)     | -176.9(4)  |
| C(56)-C(51)-C(52)-C(57)     | 171.1(4)   |
| N(45)-C(51)-C(52)-C(57)     | -1.6(7)    |
| C(51)-C(52)-C(53)-C(54)     | 1.4(7)     |
| C(57)-C(52)-C(53)-C(54)     | -174.0(5)  |
| C(52)-C(53)-C(54)-C(55)     | 1.0(8)     |
| C(53)-C(54)-C(55)-C(56)     | -0.8(8)    |
| C(54)-C(55)-C(56)-C(51)     | -1.8(7)    |
| C(54)-C(55)-C(56)-C(58)     | 174.3(4)   |
| C(52)-C(51)-C(56)-C(55)     | 4.3(7)     |
| N(45)-C(51)-C(56)-C(55)     | 177.0(4)   |
| C(52)-C(51)-C(56)-C(58)     | -171.7(4)  |
| N(45)-C(51)-C(56)-C(58)     | 1.0(7)     |
| C(44)-N(48)-C(61A)-C(62A)   | -103.1(10) |
| C(47)-N(48)-C(61A)-C(62A)   | 88.0(11)   |
| C(61B)-N(48)-C(61A)-C(62A)  | -1(4)      |
| C(44)-N(48)-C(61A)-C(66A)   | 76.2(13)   |
| C(47)-N(48)-C(61A)-C(66A)   | -92.7(12)  |
| C(61B)-N(48)-C(61A)-C(66A)  | 178(5)     |
| C(66A)-C(61A)-C(62A)-C(63A) | -0.9(18)   |
| N(48)-C(61A)-C(62A)-C(63A)  | 178.3(10)  |
| C(66A)-C(61A)-C(62A)-C(67A) | -179.5(12) |
| N(48)-C(61A)-C(62A)-C(67A)  | -0.3(15)   |
| C(61A)-C(62A)-C(63A)-C(64A) | 0.1(18)    |
| C(67A)-C(62A)-C(63A)-C(64A) | 178.7(11)  |
| C(62A)-C(63A)-C(64A)-C(65A) | 0(2)       |
| C(63A)-C(64A)-C(65A)-C(66A) | 0.5(19)    |
| C(64A)-C(65A)-C(66A)-C(61A) | -1.1(17)   |
| C(64A)-C(65A)-C(66A)-C(68A) | 177.9(11)  |
| C(62A)-C(61A)-C(66A)-C(65A) | 1.4(19)    |
| N(48)-C(61A)-C(66A)-C(65A)  | -177.9(10) |
| C(62A)-C(61A)-C(66A)-C(68A) | -177.6(11) |
| N(48)-C(61A)-C(66A)-C(68A)  | 3.2(19)    |
| C(44)-N(48)-C(61B)-C(62B)   | -89(3)     |
| C(47)-N(48)-C(61B)-C(62B)   | 74(3)      |

|                             |            |
|-----------------------------|------------|
| C(61A)-N(48)-C(61B)-C(62B)  | 177(7)     |
| C(44)-N(48)-C(61B)-C(66B)   | 93(2)      |
| C(47)-N(48)-C(61B)-C(66B)   | -103.7(19) |
| C(61A)-N(48)-C(61B)-C(66B)  | 0(3)       |
| C(66B)-C(61B)-C(62B)-C(63B) | 1(4)       |
| N(48)-C(61B)-C(62B)-C(63B)  | -176(2)    |
| C(66B)-C(61B)-C(62B)-C(67B) | 179(2)     |
| N(48)-C(61B)-C(62B)-C(67B)  | 1(4)       |
| C(61B)-C(62B)-C(63B)-C(64B) | -5(3)      |
| C(67B)-C(62B)-C(63B)-C(64B) | 178(2)     |
| C(62B)-C(63B)-C(64B)-C(65B) | 3(4)       |
| C(63B)-C(64B)-C(65B)-C(66B) | 2(5)       |
| C(62B)-C(61B)-C(66B)-C(65B) | 4(4)       |
| N(48)-C(61B)-C(66B)-C(65B)  | -179(2)    |
| C(62B)-C(61B)-C(66B)-C(68B) | 176(3)     |
| N(48)-C(61B)-C(66B)-C(68B)  | -6(3)      |
| C(64B)-C(65B)-C(66B)-C(61B) | -6(4)      |
| C(64B)-C(65B)-C(66B)-C(68B) | -178(3)    |
| C(44)-Ru(41)-C(70)-C(71)    | 179.8(4)   |
| O(77)-Ru(41)-C(70)-C(71)    | 0.2(4)     |
| Cl(42)-Ru(41)-C(70)-C(71)   | 84.2(4)    |
| Cl(43)-Ru(41)-C(70)-C(71)   | -84.1(4)   |
| Ru(41)-C(70)-C(71)-C(72)    | -1.7(7)    |
| Ru(41)-C(70)-C(71)-C(76)    | 179.6(4)   |
| C(76)-C(71)-C(72)-O(77)     | -178.5(5)  |
| C(70)-C(71)-C(72)-O(77)     | 2.7(7)     |
| C(76)-C(71)-C(72)-C(73)     | 1.5(8)     |
| C(70)-C(71)-C(72)-C(73)     | -177.3(5)  |
| O(77)-C(72)-C(73)-C(74)     | 178.6(5)   |
| C(71)-C(72)-C(73)-C(74)     | -1.5(8)    |
| C(72)-C(73)-C(74)-C(75)     | -0.8(8)    |
| C(73)-C(74)-C(75)-C(76)     | 3.0(8)     |
| C(74)-C(75)-C(76)-C(71)     | -3.0(8)    |
| C(72)-C(71)-C(76)-C(75)     | 0.8(8)     |
| C(70)-C(71)-C(76)-C(75)     | 179.5(5)   |
| C(71)-C(72)-O(77)-C(78)     | 167.2(4)   |
| C(73)-C(72)-O(77)-C(78)     | -12.8(7)   |
| C(71)-C(72)-O(77)-Ru(41)    | -2.3(5)    |
| C(73)-C(72)-O(77)-Ru(41)    | 177.7(4)   |

|                           |           |
|---------------------------|-----------|
| C(70)-Ru(41)-O(77)-C(72)  | 1.2(3)    |
| C(44)-Ru(41)-O(77)-C(72)  | -21(8)    |
| Cl(42)-Ru(41)-O(77)-C(72) | -99.0(3)  |
| Cl(43)-Ru(41)-O(77)-C(72) | 102.5(3)  |
| C(70)-Ru(41)-O(77)-C(78)  | -166.9(4) |
| C(44)-Ru(41)-O(77)-C(78)  | 171(43)   |
| Cl(42)-Ru(41)-O(77)-C(78) | 92.8(4)   |
| Cl(43)-Ru(41)-O(77)-C(78) | -65.6(4)  |
| C(72)-O(77)-C(78)-C(79)   | 173.5(4)  |
| Ru(41)-O(77)-C(78)-C(79)  | -19.4(6)  |
| C(72)-O(77)-C(78)-C(80)   | -64.2(6)  |
| Ru(41)-O(77)-C(78)-C(80)  | 102.8(4)  |
| C(110)-Ru(81)-C(84)-N(88) | -4.0(5)   |
| O(117)-Ru(81)-C(84)-N(88) | 102(10)   |
| Cl(83)-Ru(81)-C(84)-N(88) | -104.5(5) |
| Cl(82)-Ru(81)-C(84)-N(88) | 98.9(5)   |
| C(110)-Ru(81)-C(84)-N(85) | 178.5(4)  |
| O(117)-Ru(81)-C(84)-N(85) | -76(10)   |
| Cl(83)-Ru(81)-C(84)-N(85) | 78.0(4)   |
| Cl(82)-Ru(81)-C(84)-N(85) | -78.6(4)  |
| N(88)-C(84)-N(85)-C(86)   | 0.9(5)    |
| Ru(81)-C(84)-N(85)-C(86)  | 179.1(3)  |
| N(88)-C(84)-N(85)-C(91)   | 179.2(4)  |
| Ru(81)-C(84)-N(85)-C(91)  | -2.6(7)   |
| C(84)-N(85)-C(86)-C(87)   | -0.9(6)   |
| C(91)-N(85)-C(86)-C(87)   | -179.3(5) |
| N(85)-C(86)-C(87)-N(88)   | 0.5(6)    |
| N(85)-C(84)-N(88)-C(87)   | -0.6(5)   |
| Ru(81)-C(84)-N(88)-C(87)  | -178.5(4) |
| N(85)-C(84)-N(88)-C(101)  | -177.1(4) |
| Ru(81)-C(84)-N(88)-C(101) | 5.0(8)    |
| C(86)-C(87)-N(88)-C(84)   | 0.1(6)    |
| C(86)-C(87)-N(88)-C(101)  | 176.9(5)  |
| C(84)-N(85)-C(91)-C(96)   | 93.9(6)   |
| C(86)-N(85)-C(91)-C(96)   | -88.0(6)  |
| C(84)-N(85)-C(91)-C(92)   | -90.2(6)  |
| C(86)-N(85)-C(91)-C(92)   | 87.9(6)   |
| C(96)-C(91)-C(92)-C(93)   | -6.0(7)   |
| N(85)-C(91)-C(92)-C(93)   | 178.2(4)  |

|                             |           |
|-----------------------------|-----------|
| C(96)-C(91)-C(92)-C(97)     | 168.8(5)  |
| N(85)-C(91)-C(92)-C(97)     | -7.0(7)   |
| C(91)-C(92)-C(93)-C(94)     | 2.4(8)    |
| C(97)-C(92)-C(93)-C(94)     | -172.5(5) |
| C(92)-C(93)-C(94)-C(95)     | 1.8(8)    |
| C(93)-C(94)-C(95)-C(96)     | -2.6(8)   |
| C(92)-C(91)-C(96)-C(95)     | 5.1(7)    |
| N(85)-C(91)-C(96)-C(95)     | -179.1(4) |
| C(92)-C(91)-C(96)-C(98)     | -169.7(5) |
| N(85)-C(91)-C(96)-C(98)     | 6.0(7)    |
| C(94)-C(95)-C(96)-C(91)     | -0.8(8)   |
| C(94)-C(95)-C(96)-C(98)     | 174.2(5)  |
| C(84)-N(88)-C(101)-C(106)   | 92.0(6)   |
| C(87)-N(88)-C(101)-C(106)   | -84.3(6)  |
| C(84)-N(88)-C(101)-C(102)   | -89.1(6)  |
| C(87)-N(88)-C(101)-C(102)   | 94.6(6)   |
| C(106)-C(101)-C(102)-C(103) | -1.3(7)   |
| N(88)-C(101)-C(102)-C(103)  | 179.9(4)  |
| C(106)-C(101)-C(102)-C(107) | 177.7(5)  |
| N(88)-C(101)-C(102)-C(107)  | -1.1(7)   |
| C(101)-C(102)-C(103)-C(104) | -0.6(7)   |
| C(107)-C(102)-C(103)-C(104) | -179.6(5) |
| C(102)-C(103)-C(104)-C(105) | 2.2(8)    |
| C(103)-C(104)-C(105)-C(106) | -2.0(8)   |
| C(102)-C(101)-C(106)-C(105) | 1.4(7)    |
| N(88)-C(101)-C(106)-C(105)  | -179.7(4) |
| C(102)-C(101)-C(106)-C(108) | -176.2(4) |
| N(88)-C(101)-C(106)-C(108)  | 2.7(7)    |
| C(104)-C(105)-C(106)-C(101) | 0.3(7)    |
| C(104)-C(105)-C(106)-C(108) | 177.8(5)  |
| C(84)-Ru(81)-C(110)-C(111)  | 176.8(3)  |
| O(117)-Ru(81)-C(110)-C(111) | -2.2(3)   |
| Cl(83)-Ru(81)-C(110)-C(111) | -87.8(3)  |
| Cl(82)-Ru(81)-C(110)-C(111) | 82.7(3)   |
| Ru(81)-C(110)-C(111)-C(112) | 1.5(6)    |
| Ru(81)-C(110)-C(111)-C(116) | -178.1(3) |
| C(116)-C(111)-C(112)-O(117) | -179.3(4) |
| C(110)-C(111)-C(112)-O(117) | 1.0(6)    |
| C(116)-C(111)-C(112)-C(113) | 0.5(7)    |



|                             |           |
|-----------------------------|-----------|
| C(110)-C(111)-C(112)-C(113) | -179.1(4) |
| O(117)-C(112)-C(113)-C(114) | -179.5(4) |
| C(111)-C(112)-C(113)-C(114) | 0.7(7)    |
| C(112)-C(113)-C(114)-C(115) | -1.0(7)   |
| C(113)-C(114)-C(115)-C(116) | 0.0(7)    |
| C(114)-C(115)-C(116)-C(111) | 1.3(7)    |
| C(112)-C(111)-C(116)-C(115) | -1.5(7)   |
| C(110)-C(111)-C(116)-C(115) | 178.1(4)  |
| C(113)-C(112)-O(117)-C(118) | 10.8(7)   |
| C(111)-C(112)-O(117)-C(118) | -169.3(4) |
| C(113)-C(112)-O(117)-Ru(81) | 177.6(4)  |
| C(111)-C(112)-O(117)-Ru(81) | -2.5(4)   |
| C(110)-Ru(81)-O(117)-C(112) | 2.7(3)    |
| C(84)-Ru(81)-O(117)-C(112)  | -103(10)  |
| Cl(83)-Ru(81)-O(117)-C(112) | 102.9(3)  |
| Cl(82)-Ru(81)-O(117)-C(112) | -100.5(3) |
| C(110)-Ru(81)-O(117)-C(118) | 167.8(4)  |
| C(84)-Ru(81)-O(117)-C(118)  | 62(10)    |
| Cl(83)-Ru(81)-O(117)-C(118) | -91.9(3)  |
| Cl(82)-Ru(81)-O(117)-C(118) | 64.7(3)   |
| C(112)-O(117)-C(118)-C(120) | 69.0(5)   |
| Ru(81)-O(117)-C(118)-C(120) | -95.0(4)  |
| C(112)-O(117)-C(118)-C(119) | -167.7(4) |
| Ru(81)-O(117)-C(118)-C(119) | 28.3(5)   |

---
